# Supplementary material for: An experimental test of the effects of redacting grant applicant identifiers on peer review outcomes
Source: eLife. 2021 Oct 19;10:e71368. doi: 10.7554/eLife.71368 (PMC8612703; doi:10.7554/eLife.71368)
Supplement: Source data 1. [file elife-71368-supp3.xlsx]

## Sheet: T5 primary analysis model avg
prd_appl_id_anon1	avg_overall_score	condition	groupRace	raceCent	conditCent
613	4.33333	STAN	White Matched	0.5	0.5
338	3	STAN	Black	-0.5	0.5
793	3.66667	STAN	White Matched	0.5	0.5
206	5	STAN	White Matched	0.5	0.5
452	3.33333	STAN	White Matched	0.5	0.5
654	2.66667	STAN	Black	-0.5	0.5
134	4.33333	STAN	White Matched	0.5	0.5
775	1.33333	STAN	White Matched	0.5	0.5
542	5.33333	STAN	White Matched	0.5	0.5
703	5.33333	STAN	White Matched	0.5	0.5
566	2.33333	STAN	Black	-0.5	0.5
607	3	STAN	White Matched	0.5	0.5
521	2.33333	STAN	Black	-0.5	0.5
250	3	STAN	Black	-0.5	0.5
713	5.33333	STAN	White Matched	0.5	0.5
599	6.66667	STAN	Black	-0.5	0.5
383	4.33333	STAN	White Matched	0.5	0.5
632	3.33333	STAN	White Matched	0.5	0.5
187	3.33333	STAN	White Matched	0.5	0.5
281	3.66667	STAN	Black	-0.5	0.5
773	3	STAN	White Matched	0.5	0.5
657	6.66667	STAN	White Matched	0.5	0.5
604	1.33333	STAN	Black	-0.5	0.5
714	7	STAN	Black	-0.5	0.5
564	2.66667	STAN	White Matched	0.5	0.5
705	3.33333	STAN	Black	-0.5	0.5
674	5.33333	STAN	Black	-0.5	0.5
352	4	STAN	Black	-0.5	0.5
532	4.33333	STAN	White Matched	0.5	0.5
692	5.33333	STAN	Black	-0.5	0.5
256	4.5	STAN	Black	-0.5	0.5
796	3	STAN	White Matched	0.5	0.5
397	3.66667	STAN	White Matched	0.5	0.5
637	4	STAN	White Matched	0.5	0.5
372	5.33333	STAN	Black	-0.5	0.5
183	4	STAN	White Matched	0.5	0.5
497	5	STAN	Black	-0.5	0.5
307	4.5	STAN	White Matched	0.5	0.5
247	5	STAN	White Matched	0.5	0.5
616	3.33333	STAN	White Matched	0.5	0.5
188	5	STAN	Black	-0.5	0.5
550	2	STAN	White Matched	0.5	0.5
119	2.33333	STAN	Black	-0.5	0.5
279	3	STAN	Black	-0.5	0.5
203	5.33333	STAN	White Matched	0.5	0.5
407	4.33333	STAN	Black	-0.5	0.5
498	3.66667	STAN	Black	-0.5	0.5
592	2.66667	STAN	Black	-0.5	0.5
799	3.66667	STAN	Black	-0.5	0.5
107	4	STAN	White Matched	0.5	0.5
681	6	STAN	Black	-0.5	0.5
543	2.33333	STAN	White Matched	0.5	0.5
110	2.33333	STAN	White Matched	0.5	0.5
165	4.33333	STAN	White Matched	0.5	0.5
718	3.66667	STAN	White Matched	0.5	0.5
529	4.66667	STAN	Black	-0.5	0.5
450	4.66667	STAN	Black	-0.5	0.5
549	5.33333	STAN	Black	-0.5	0.5
462	4	STAN	Black	-0.5	0.5
284	3.33333	STAN	Black	-0.5	0.5
715	1.66667	STAN	White Matched	0.5	0.5
712	4.66667	STAN	White Matched	0.5	0.5
707	3.66667	STAN	Black	-0.5	0.5
494	3.66667	STAN	White Matched	0.5	0.5
508	4	STAN	Black	-0.5	0.5
536	4.66667	STAN	White Matched	0.5	0.5
573	3	STAN	Black	-0.5	0.5
401	3	STAN	White Matched	0.5	0.5
233	2	STAN	Black	-0.5	0.5
398	3.33333	STAN	White Matched	0.5	0.5
531	3	STAN	Black	-0.5	0.5
682	5.66667	STAN	Black	-0.5	0.5
596	2.33333	STAN	White Matched	0.5	0.5
387	3	STAN	White Matched	0.5	0.5
584	5	STAN	White Matched	0.5	0.5
461	4	STAN	White Matched	0.5	0.5
311	5.33333	STAN	White Matched	0.5	0.5
440	4	STAN	White Matched	0.5	0.5
463	3.33333	STAN	Black	-0.5	0.5
264	3.66667	STAN	Black	-0.5	0.5
375	4	STAN	Black	-0.5	0.5
214	4.66667	STAN	Black	-0.5	0.5
339	6	STAN	White Matched	0.5	0.5
678	2.66667	STAN	White Matched	0.5	0.5
414	4.66667	STAN	White Matched	0.5	0.5
286	3.33333	STAN	White Matched	0.5	0.5
425	3	STAN	Black	-0.5	0.5
288	5	STAN	White Matched	0.5	0.5
263	3.66667	STAN	White Matched	0.5	0.5
323	3	STAN	Black	-0.5	0.5
506	6	STAN	Black	-0.5	0.5
514	3.33333	STAN	Black	-0.5	0.5
361	5	STAN	White Matched	0.5	0.5
213	2	STAN	White Matched	0.5	0.5
671	4.66667	STAN	White Matched	0.5	0.5
224	1.66667	STAN	White Matched	0.5	0.5
242	3.33333	STAN	White Matched	0.5	0.5
689	4.66667	STAN	Black	-0.5	0.5
645	4	STAN	Black	-0.5	0.5
266	3	STAN	Black	-0.5	0.5
207	3.33333	STAN	Black	-0.5	0.5
368	4.66667	STAN	Black	-0.5	0.5
272	2.33333	STAN	White Matched	0.5	0.5
172	2.66667	STAN	Black	-0.5	0.5
193	3	STAN	Black	-0.5	0.5
161	4.33333	STAN	White Matched	0.5	0.5
524	4	STAN	Black	-0.5	0.5
749	6	STAN	Black	-0.5	0.5
133	2.66667	STAN	White Matched	0.5	0.5
359	3.66667	STAN	Black	-0.5	0.5
639	6.66667	STAN	White Matched	0.5	0.5
112	5	STAN	Black	-0.5	0.5
606	3.33333	STAN	White Matched	0.5	0.5
720	2.33333	STAN	White Matched	0.5	0.5
545	3	STAN	Black	-0.5	0.5
571	4.33333	STAN	Black	-0.5	0.5
482	5	STAN	White Matched	0.5	0.5
304	5	STAN	White Matched	0.5	0.5
120	4.66667	STAN	Black	-0.5	0.5
154	5.33333	STAN	Black	-0.5	0.5
774	4	STAN	Black	-0.5	0.5
238	5	STAN	White Matched	0.5	0.5
548	2.66667	STAN	Black	-0.5	0.5
215	5.33333	STAN	Black	-0.5	0.5
663	4	STAN	White Matched	0.5	0.5
659	3.66667	STAN	White Matched	0.5	0.5
275	3.33333	STAN	White Matched	0.5	0.5
504	3	STAN	White Matched	0.5	0.5
761	4	STAN	White Matched	0.5	0.5
699	3	STAN	White Matched	0.5	0.5
694	3.66667	STAN	Black	-0.5	0.5
405	4	STAN	Black	-0.5	0.5
557	4.66667	STAN	Black	-0.5	0.5
302	5.33333	STAN	White Matched	0.5	0.5
577	2	STAN	Black	-0.5	0.5
480	5	STAN	White Matched	0.5	0.5
777	5	STAN	Black	-0.5	0.5
527	3	STAN	White Matched	0.5	0.5
326	4	STAN	White Matched	0.5	0.5
628	4	STAN	Black	-0.5	0.5
139	4.33333	STAN	Black	-0.5	0.5
502	5.66667	STAN	White Matched	0.5	0.5
294	3.33333	STAN	White Matched	0.5	0.5
752	3.66667	STAN	Black	-0.5	0.5
219	2	STAN	Black	-0.5	0.5
457	4	STAN	White Matched	0.5	0.5
223	5	STAN	White Matched	0.5	0.5
404	3.33333	STAN	Black	-0.5	0.5
467	4.33333	STAN	White Matched	0.5	0.5
734	4	STAN	White Matched	0.5	0.5
619	4	STAN	Black	-0.5	0.5
731	3.66667	STAN	White Matched	0.5	0.5
686	5.33333	STAN	Black	-0.5	0.5
156	5.33333	STAN	White Matched	0.5	0.5
533	1.66667	STAN	White Matched	0.5	0.5
346	4	STAN	White Matched	0.5	0.5
477	4	STAN	White Matched	0.5	0.5
762	3	STAN	White Matched	0.5	0.5
225	4	STAN	Black	-0.5	0.5
781	4	STAN	White Matched	0.5	0.5
180	2.66667	STAN	Black	-0.5	0.5
394	4	STAN	White Matched	0.5	0.5
677	4.66667	STAN	Black	-0.5	0.5
651	3.33333	STAN	Black	-0.5	0.5
481	3.66667	STAN	White Matched	0.5	0.5
483	4.5	STAN	White Matched	0.5	0.5
501	4	STAN	White Matched	0.5	0.5
340	5.66667	STAN	White Matched	0.5	0.5
464	5.66667	STAN	Black	-0.5	0.5
424	3.33333	STAN	Black	-0.5	0.5
353	3.66667	STAN	Black	-0.5	0.5
534	4	STAN	Black	-0.5	0.5
334	4.33333	STAN	White Matched	0.5	0.5
174	5.66667	STAN	Black	-0.5	0.5
583	4	STAN	Black	-0.5	0.5
143	3.33333	STAN	White Matched	0.5	0.5
438	5.66667	STAN	White Matched	0.5	0.5
570	4	STAN	Black	-0.5	0.5
717	2	STAN	Black	-0.5	0.5
409	3	STAN	White Matched	0.5	0.5
432	4.66667	STAN	White Matched	0.5	0.5
474	2.33333	STAN	Black	-0.5	0.5
624	3	STAN	Black	-0.5	0.5
403	5	STAN	White Matched	0.5	0.5
210	4	STAN	White Matched	0.5	0.5
303	3.33333	STAN	White Matched	0.5	0.5
111	4.33333	STAN	White Matched	0.5	0.5
392	3.33333	STAN	White Matched	0.5	0.5
448	3.33333	STAN	Black	-0.5	0.5
178	8.66667	STAN	Black	-0.5	0.5
709	4.33333	STAN	White Matched	0.5	0.5
319	4.66667	STAN	White Matched	0.5	0.5
292	5	STAN	Black	-0.5	0.5
800	3.66667	STAN	Black	-0.5	0.5
441	2.33333	STAN	White Matched	0.5	0.5
248	4.33333	STAN	Black	-0.5	0.5
336	4	STAN	White Matched	0.5	0.5
641	3.5	STAN	Black	-0.5	0.5
118	5.66667	STAN	White Matched	0.5	0.5
574	3.66667	STAN	White Matched	0.5	0.5
142	4.33333	STAN	Black	-0.5	0.5
561	1.66667	STAN	White Matched	0.5	0.5
453	5	STAN	White Matched	0.5	0.5
347	2.66667	STAN	White Matched	0.5	0.5
652	4.33333	STAN	White Matched	0.5	0.5
465	5	STAN	Black	-0.5	0.5
442	7	STAN	White Matched	0.5	0.5
608	3	STAN	Black	-0.5	0.5
693	4.66667	STAN	Black	-0.5	0.5
212	4.66667	STAN	Black	-0.5	0.5
135	3.33333	STAN	White Matched	0.5	0.5
289	6.66667	STAN	White Matched	0.5	0.5
476	4.66667	STAN	Black	-0.5	0.5
609	3.66667	STAN	White Matched	0.5	0.5
520	2.66667	STAN	Black	-0.5	0.5
472	4	STAN	White Matched	0.5	0.5
650	5.66667	STAN	Black	-0.5	0.5
636	4	STAN	White Matched	0.5	0.5
745	4	STAN	Black	-0.5	0.5
750	3	STAN	White Matched	0.5	0.5
322	6	STAN	Black	-0.5	0.5
197	3.33333	STAN	White Matched	0.5	0.5
471	5.33333	STAN	White Matched	0.5	0.5
552	3.33333	STAN	White Matched	0.5	0.5
794	4	STAN	Black	-0.5	0.5
419	2.33333	STAN	Black	-0.5	0.5
348	4.33333	STAN	Black	-0.5	0.5
735	3.66667	STAN	Black	-0.5	0.5
237	4.5	STAN	Black	-0.5	0.5
544	3	STAN	White Matched	0.5	0.5
181	3.66667	STAN	Black	-0.5	0.5
106	4.66667	STAN	White Matched	0.5	0.5
620	5	STAN	Black	-0.5	0.5
229	4	STAN	Black	-0.5	0.5
103	4.66667	STAN	Black	-0.5	0.5
240	3.33333	STAN	White Matched	0.5	0.5
117	5	STAN	Black	-0.5	0.5
406	2.33333	STAN	Black	-0.5	0.5
697	5	STAN	Black	-0.5	0.5
546	4	STAN	White Matched	0.5	0.5
200	6	STAN	White Matched	0.5	0.5
753	5	STAN	White Matched	0.5	0.5
558	3.66667	STAN	White Matched	0.5	0.5
176	4.66667	STAN	Black	-0.5	0.5
458	5	STAN	White Matched	0.5	0.5
562	2.33333	STAN	White Matched	0.5	0.5
539	2.66667	STAN	Black	-0.5	0.5
175	5	STAN	Black	-0.5	0.5
171	3	STAN	Black	-0.5	0.5
783	4.33333	STAN	Black	-0.5	0.5
499	4	STAN	White Matched	0.5	0.5
249	3	STAN	Black	-0.5	0.5
366	4.33333	STAN	White Matched	0.5	0.5
151	6	STAN	Black	-0.5	0.5
518	5	STAN	Black	-0.5	0.5
764	4.33333	STAN	Black	-0.5	0.5
788	4.33333	STAN	Black	-0.5	0.5
301	3.33333	STAN	Black	-0.5	0.5
666	2	STAN	White Matched	0.5	0.5
479	3.66667	STAN	White Matched	0.5	0.5
716	6	STAN	White Matched	0.5	0.5
243	1.66667	STAN	Black	-0.5	0.5
634	3.33333	STAN	White Matched	0.5	0.5
665	2.66667	STAN	White Matched	0.5	0.5
101	6	STAN	White Matched	0.5	0.5
439	3.66667	STAN	White Matched	0.5	0.5
770	3	STAN	Black	-0.5	0.5
260	2.33333	STAN	White Matched	0.5	0.5
766	4	STAN	Black	-0.5	0.5
587	4	STAN	Black	-0.5	0.5
789	3.66667	STAN	Black	-0.5	0.5
350	4	STAN	Black	-0.5	0.5
345	4.33333	STAN	Black	-0.5	0.5
380	3.66667	STAN	White Matched	0.5	0.5
376	5	STAN	White Matched	0.5	0.5
199	3.66667	STAN	White Matched	0.5	0.5
736	3	STAN	White Matched	0.5	0.5
235	4	STAN	Black	-0.5	0.5
547	2.66667	STAN	White Matched	0.5	0.5
131	3	STAN	Black	-0.5	0.5
365	2	STAN	Black	-0.5	0.5
511	3.66667	STAN	Black	-0.5	0.5
489	4	STAN	White Matched	0.5	0.5
90	3.66667	STAN	Black	-0.5	0.5
611	3.66667	STAN	White Matched	0.5	0.5
470	4	STAN	Black	-0.5	0.5
379	4.33333	STAN	Black	-0.5	0.5
780	4.33333	STAN	Black	-0.5	0.5
748	3.66667	STAN	White Matched	0.5	0.5
643	5.33333	STAN	Black	-0.5	0.5
629	2.66667	STAN	White Matched	0.5	0.5
127	4.33333	STAN	Black	-0.5	0.5
258	4.66667	STAN	White Matched	0.5	0.5
556	4	STAN	Black	-0.5	0.5
226	5	STAN	Black	-0.5	0.5
351	5.66667	STAN	White Matched	0.5	0.5
273	2	STAN	Black	-0.5	0.5
246	5	STAN	White Matched	0.5	0.5
598	2.66667	STAN	Black	-0.5	0.5
418	6.66667	STAN	Black	-0.5	0.5
763	1.66667	STAN	White Matched	0.5	0.5
259	4.66667	STAN	White Matched	0.5	0.5
456	6	STAN	Black	-0.5	0.5
662	6.66667	STAN	Black	-0.5	0.5
779	5	STAN	Black	-0.5	0.5
589	4	STAN	Black	-0.5	0.5
600	5	STAN	Black	-0.5	0.5
400	3	STAN	White Matched	0.5	0.5
189	3	STAN	White Matched	0.5	0.5
790	3.33333	STAN	White Matched	0.5	0.5
565	3.33333	STAN	White Matched	0.5	0.5
324	5.66667	STAN	White Matched	0.5	0.5
526	5	STAN	White Matched	0.5	0.5
384	4.66667	STAN	Black	-0.5	0.5
158	3.33333	STAN	Black	-0.5	0.5
535	3.66667	STAN	Black	-0.5	0.5
109	4.33333	STAN	White Matched	0.5	0.5
523	6	STAN	White Matched	0.5	0.5
601	5.33333	STAN	Black	-0.5	0.5
487	3	STAN	White Matched	0.5	0.5
417	3	STAN	Black	-0.5	0.5
488	5	STAN	White Matched	0.5	0.5
530	4	STAN	Black	-0.5	0.5
648	4.66667	STAN	Black	-0.5	0.5
114	4.33333	STAN	White Matched	0.5	0.5
603	1.66667	STAN	Black	-0.5	0.5
755	5.33333	STAN	Black	-0.5	0.5
722	3	STAN	White Matched	0.5	0.5
358	5.33333	STAN	Black	-0.5	0.5
342	4.66667	STAN	White Matched	0.5	0.5
327	4	STAN	White Matched	0.5	0.5
390	3	STAN	White Matched	0.5	0.5
313	5	STAN	White Matched	0.5	0.5
230	4	STAN	White Matched	0.5	0.5
760	3.66667	STAN	Black	-0.5	0.5
155	4	STAN	Black	-0.5	0.5
661	3.33333	STAN	Black	-0.5	0.5
296	1.66667	STAN	White Matched	0.5	0.5
525	4.66667	STAN	Black	-0.5	0.5
179	4	STAN	Black	-0.5	0.5
153	4	STAN	White Matched	0.5	0.5
454	5	STAN	Black	-0.5	0.5
208	4.5	STAN	Black	-0.5	0.5
309	3.66667	STAN	White Matched	0.5	0.5
700	5	STAN	Black	-0.5	0.5
157	3	STAN	Black	-0.5	0.5
126	6	STAN	Black	-0.5	0.5
507	2.66667	STAN	White Matched	0.5	0.5
787	5.33333	STAN	Black	-0.5	0.5
676	3.66667	STAN	Black	-0.5	0.5
244	3.66667	STAN	White Matched	0.5	0.5
618	3.66667	STAN	White Matched	0.5	0.5
300	3.66667	STAN	Black	-0.5	0.5
772	4	STAN	White Matched	0.5	0.5
742	3.66667	STAN	Black	-0.5	0.5
680	4.33333	STAN	Black	-0.5	0.5
182	6.66667	STAN	Black	-0.5	0.5
683	4	STAN	Black	-0.5	0.5
245	4.66667	STAN	Black	-0.5	0.5
184	3.66667	STAN	Black	-0.5	0.5
195	3.66667	STAN	White Matched	0.5	0.5
321	3.66667	STAN	White Matched	0.5	0.5
615	5.33333	STAN	Black	-0.5	0.5
500	4.66667	STAN	White Matched	0.5	0.5
776	3	STAN	White Matched	0.5	0.5
337	3.33333	STAN	White Matched	0.5	0.5
239	2.33333	STAN	White Matched	0.5	0.5
393	4	STAN	White Matched	0.5	0.5
385	6.66667	STAN	White Matched	0.5	0.5
428	2	STAN	Black	-0.5	0.5
332	6	STAN	Black	-0.5	0.5
274	4.33333	STAN	Black	-0.5	0.5
572	2.66667	STAN	White Matched	0.5	0.5
320	3.5	STAN	White Matched	0.5	0.5
408	2.33333	STAN	Black	-0.5	0.5
446	4	STAN	White Matched	0.5	0.5
415	3	STAN	Black	-0.5	0.5
293	2.66667	STAN	White Matched	0.5	0.5
356	4	STAN	White Matched	0.5	0.5
706	6.33333	STAN	White Matched	0.5	0.5
436	3.66667	STAN	White Matched	0.5	0.5
113	3.33333	STAN	White Matched	0.5	0.5
673	4.33333	STAN	Black	-0.5	0.5
519	3	STAN	White Matched	0.5	0.5
316	5	STAN	White Matched	0.5	0.5
201	3.66667	STAN	White Matched	0.5	0.5
283	2.33333	STAN	Black	-0.5	0.5
679	3.33333	STAN	Black	-0.5	0.5
786	3.33333	STAN	White Matched	0.5	0.5
578	3	STAN	White Matched	0.5	0.5
128	1.33333	STAN	White Matched	0.5	0.5
168	3.33333	STAN	Black	-0.5	0.5
314	3	STAN	White Matched	0.5	0.5
638	3.33333	STAN	White Matched	0.5	0.5
642	3.66667	STAN	Black	-0.5	0.5
169	3	STAN	Black	-0.5	0.5
727	2.66667	STAN	White Matched	0.5	0.5
449	5	STAN	Black	-0.5	0.5
516	3	STAN	Black	-0.5	0.5
466	3.66667	STAN	White Matched	0.5	0.5
740	4.66667	STAN	Black	-0.5	0.5
585	5	STAN	White Matched	0.5	0.5
444	2.66667	STAN	White Matched	0.5	0.5
217	3.33333	STAN	White Matched	0.5	0.5
262	2.33333	STAN	White Matched	0.5	0.5
510	1.66667	STAN	Black	-0.5	0.5
298	2.33333	STAN	Black	-0.5	0.5
725	2	STAN	Black	-0.5	0.5
211	5	STAN	White Matched	0.5	0.5
459	3.33333	STAN	White Matched	0.5	0.5
185	2.33333	STAN	Black	-0.5	0.5
234	2.33333	STAN	White Matched	0.5	0.5
190	5	STAN	White Matched	0.5	0.5
443	3.66667	STAN	White Matched	0.5	0.5
785	5.66667	STAN	Black	-0.5	0.5
517	5.66667	STAN	Black	-0.5	0.5
597	4	STAN	Black	-0.5	0.5
765	3	STAN	White Matched	0.5	0.5
729	6.66667	STAN	White Matched	0.5	0.5
144	4.33333	STAN	Black	-0.5	0.5
287	5	STAN	Black	-0.5	0.5
141	5	STAN	White Matched	0.5	0.5
399	2.33333	STAN	White Matched	0.5	0.5
396	2.66667	STAN	White Matched	0.5	0.5
445	3.33333	STAN	Black	-0.5	0.5
475	6.33333	STAN	Black	-0.5	0.5
411	4.66667	STAN	White Matched	0.5	0.5
627	6.66667	STAN	Black	-0.5	0.5
209	4.66667	STAN	Black	-0.5	0.5
434	3	STAN	Black	-0.5	0.5
555	3	STAN	Black	-0.5	0.5
698	4	STAN	Black	-0.5	0.5
660	2.33333	STAN	White Matched	0.5	0.5
447	2.66667	STAN	White Matched	0.5	0.5
771	2.66667	STAN	Black	-0.5	0.5
655	5.66667	STAN	White Matched	0.5	0.5
241	3	STAN	White Matched	0.5	0.5
236	3.66667	STAN	White Matched	0.5	0.5
382	4.66667	STAN	Black	-0.5	0.5
116	4.33333	STAN	Black	-0.5	0.5
647	4.33333	STAN	White Matched	0.5	0.5
711	3	STAN	Black	-0.5	0.5
140	5.66667	STAN	White Matched	0.5	0.5
228	7.66667	STAN	White Matched	0.5	0.5
512	3	STAN	White Matched	0.5	0.5
708	4.5	STAN	Black	-0.5	0.5
759	3.66667	STAN	Black	-0.5	0.5
232	3.33333	STAN	White Matched	0.5	0.5
276	3.33333	STAN	White Matched	0.5	0.5
741	3.33333	STAN	Black	-0.5	0.5
108	4.33333	STAN	Black	-0.5	0.5
719	3.66667	STAN	White Matched	0.5	0.5
253	3.33333	STAN	White Matched	0.5	0.5
312	5	STAN	Black	-0.5	0.5
522	5.66667	STAN	Black	-0.5	0.5
317	5.66667	STAN	Black	-0.5	0.5
367	3	STAN	Black	-0.5	0.5
265	2	STAN	White Matched	0.5	0.5
756	2.33333	STAN	White Matched	0.5	0.5
695	3.33333	STAN	Black	-0.5	0.5
528	2	STAN	White Matched	0.5	0.5
758	4.66667	STAN	Black	-0.5	0.5
167	7.33333	STAN	Black	-0.5	0.5
330	6.33333	STAN	Black	-0.5	0.5
784	4.33333	STAN	Black	-0.5	0.5
622	2.66667	STAN	White Matched	0.5	0.5
653	4.33333	STAN	White Matched	0.5	0.5
646	4.66667	STAN	White Matched	0.5	0.5
623	4	STAN	White Matched	0.5	0.5
605	5	STAN	White Matched	0.5	0.5
121	3	STAN	Black	-0.5	0.5
331	5.33333	STAN	White Matched	0.5	0.5
102	5.33333	STAN	Black	-0.5	0.5
595	1.33333	STAN	Black	-0.5	0.5
490	4	STAN	White Matched	0.5	0.5
192	4	STAN	Black	-0.5	0.5
435	3.33333	STAN	White Matched	0.5	0.5
685	2.66667	STAN	White Matched	0.5	0.5
767	5.33333	STAN	Black	-0.5	0.5
343	3.66667	STAN	White Matched	0.5	0.5
797	4	STAN	White Matched	0.5	0.5
640	3	STAN	White Matched	0.5	0.5
297	6.66667	STAN	White Matched	0.5	0.5
478	4.33333	STAN	White Matched	0.5	0.5
357	4	STAN	White Matched	0.5	0.5
231	3.33333	STAN	Black	-0.5	0.5
389	2.33333	STAN	Black	-0.5	0.5
733	5.66667	STAN	Black	-0.5	0.5
369	5.33333	STAN	Black	-0.5	0.5
325	5	STAN	Black	-0.5	0.5
593	4	STAN	Black	-0.5	0.5
560	2.33333	STAN	Black	-0.5	0.5
743	3.66667	STAN	White Matched	0.5	0.5
391	4.33333	STAN	White Matched	0.5	0.5
635	5.33333	STAN	Black	-0.5	0.5
122	3	STAN	White Matched	0.5	0.5
150	3	STAN	Black	-0.5	0.5
423	3.66667	STAN	Black	-0.5	0.5
386	3.33333	STAN	White Matched	0.5	0.5
669	5	STAN	White Matched	0.5	0.5
702	5	STAN	White Matched	0.5	0.5
590	2	STAN	Black	-0.5	0.5
410	2.33333	STAN	White Matched	0.5	0.5
754	3.33333	STAN	Black	-0.5	0.5
739	2.33333	STAN	Black	-0.5	0.5
261	7.33333	STAN	Black	-0.5	0.5
644	4	STAN	Black	-0.5	0.5
612	4	STAN	Black	-0.5	0.5
455	5.33333	STAN	White Matched	0.5	0.5
138	2.66667	STAN	White Matched	0.5	0.5
540	4	STAN	White Matched	0.5	0.5
373	4.33333	STAN	Black	-0.5	0.5
360	6	STAN	White Matched	0.5	0.5
538	5	STAN	Black	-0.5	0.5
152	6	STAN	White Matched	0.5	0.5
553	2.33333	STAN	White Matched	0.5	0.5
268	4	STAN	Black	-0.5	0.5
670	4.33333	STAN	White Matched	0.5	0.5
747	4.33333	STAN	Black	-0.5	0.5
162	5.33333	STAN	White Matched	0.5	0.5
728	4.33333	STAN	White Matched	0.5	0.5
468	3	STAN	White Matched	0.5	0.5
738	3	STAN	Black	-0.5	0.5
310	3	STAN	White Matched	0.5	0.5
355	5.33333	STAN	Black	-0.5	0.5
333	4.33333	STAN	Black	-0.5	0.5
687	4	STAN	Black	-0.5	0.5
267	2.66667	STAN	Black	-0.5	0.5
227	3.33333	STAN	Black	-0.5	0.5
145	3.66667	STAN	White Matched	0.5	0.5
568	5.33333	STAN	Black	-0.5	0.5
581	3.33333	STAN	White Matched	0.5	0.5
363	4.66667	STAN	Black	-0.5	0.5
594	2.66667	STAN	White Matched	0.5	0.5
166	1.33333	STAN	Black	-0.5	0.5
130	4.66667	STAN	White Matched	0.5	0.5
123	5	STAN	White Matched	0.5	0.5
202	5.66667	STAN	White Matched	0.5	0.5
421	2.66667	STAN	White Matched	0.5	0.5
586	3	STAN	White Matched	0.5	0.5
280	4.66667	STAN	White Matched	0.5	0.5
563	4.5	STAN	Black	-0.5	0.5
491	2	STAN	Black	-0.5	0.5
617	5	STAN	Black	-0.5	0.5
381	4.33333	STAN	White Matched	0.5	0.5
254	2.33333	STAN	Black	-0.5	0.5
328	4	STAN	White Matched	0.5	0.5
537	4.66667	STAN	White Matched	0.5	0.5
559	4.33333	STAN	Black	-0.5	0.5
354	4.33333	STAN	Black	-0.5	0.5
688	3	STAN	White Matched	0.5	0.5
429	3.66667	STAN	White Matched	0.5	0.5
726	2	STAN	Black	-0.5	0.5
667	5.66667	STAN	White Matched	0.5	0.5
177	6	STAN	Black	-0.5	0.5
194	6.33333	STAN	Black	-0.5	0.5
431	3	STAN	Black	-0.5	0.5
252	5	STAN	White Matched	0.5	0.5
132	6.33333	STAN	Black	-0.5	0.5
371	3.66667	STAN	White Matched	0.5	0.5
163	6	STAN	White Matched	0.5	0.5
277	4.33333	STAN	Black	-0.5	0.5
515	3.66667	STAN	Black	-0.5	0.5
257	5.33333	STAN	Black	-0.5	0.5
751	4.33333	STAN	White Matched	0.5	0.5
658	4.66667	STAN	Black	-0.5	0.5
691	4.33333	STAN	Black	-0.5	0.5
295	4	STAN	Black	-0.5	0.5
186	4.33333	STAN	White Matched	0.5	0.5
513	6.66667	STAN	Black	-0.5	0.5
503	4.33333	STAN	White Matched	0.5	0.5
426	3.33333	STAN	Black	-0.5	0.5
744	2.66667	STAN	Black	-0.5	0.5
196	5.66667	STAN	Black	-0.5	0.5
493	4.5	STAN	White Matched	0.5	0.5
576	3	STAN	White Matched	0.5	0.5
778	4	STAN	White Matched	0.5	0.5
757	2.33333	STAN	White Matched	0.5	0.5
588	3.33333	STAN	Black	-0.5	0.5
696	5	STAN	White Matched	0.5	0.5
569	3	STAN	White Matched	0.5	0.5
473	3.66667	STAN	Black	-0.5	0.5
412	2.66667	STAN	White Matched	0.5	0.5
567	3.66667	STAN	Black	-0.5	0.5
136	3.33333	STAN	White Matched	0.5	0.5
124	3	STAN	White Matched	0.5	0.5
509	3.66667	STAN	Black	-0.5	0.5
433	4.33333	STAN	Black	-0.5	0.5
308	4	STAN	White Matched	0.5	0.5
147	4.33333	STAN	White Matched	0.5	0.5
721	5.33333	STAN	Black	-0.5	0.5
451	4.33333	STAN	Black	-0.5	0.5
630	4	STAN	White Matched	0.5	0.5
672	5.33333	STAN	Black	-0.5	0.5
222	5.33333	STAN	Black	-0.5	0.5
791	3.33333	STAN	White Matched	0.5	0.5
416	4	STAN	White Matched	0.5	0.5
420	3.66667	STAN	White Matched	0.5	0.5
723	3.33333	STAN	Black	-0.5	0.5
220	5	STAN	Black	-0.5	0.5
402	5.33333	STAN	White Matched	0.5	0.5
469	4.33333	STAN	Black	-0.5	0.5
621	3.33333	STAN	Black	-0.5	0.5
668	4	STAN	Black	-0.5	0.5
290	4.33333	STAN	Black	-0.5	0.5
205	6	STAN	Black	-0.5	0.5
675	5	STAN	Black	-0.5	0.5
344	4	STAN	White Matched	0.5	0.5
377	3	STAN	White Matched	0.5	0.5
684	4.33333	STAN	White Matched	0.5	0.5
782	3	STAN	Black	-0.5	0.5
160	6	STAN	Black	-0.5	0.5
125	3.33333	STAN	White Matched	0.5	0.5
575	3.33333	STAN	Black	-0.5	0.5
656	5	STAN	Black	-0.5	0.5
701	3	STAN	White Matched	0.5	0.5
364	2.33333	STAN	Black	-0.5	0.5
218	3.66667	STAN	White Matched	0.5	0.5
388	4.66667	STAN	White Matched	0.5	0.5
633	4	STAN	White Matched	0.5	0.5
216	5	STAN	Black	-0.5	0.5
104	3.66667	STAN	Black	-0.5	0.5
164	5.66667	STAN	Black	-0.5	0.5
798	3.66667	STAN	White Matched	0.5	0.5
430	3.66667	STAN	Black	-0.5	0.5
129	4	STAN	White Matched	0.5	0.5
690	3	STAN	White Matched	0.5	0.5
541	2.33333	STAN	White Matched	0.5	0.5
602	2.33333	STAN	Black	-0.5	0.5
335	3.66667	STAN	White Matched	0.5	0.5
198	4	STAN	Black	-0.5	0.5
664	5	STAN	Black	-0.5	0.5
704	4.66667	STAN	Black	-0.5	0.5
746	3	STAN	White Matched	0.5	0.5
341	3.66667	STAN	White Matched	0.5	0.5
413	4.33333	STAN	Black	-0.5	0.5
269	3.66667	STAN	Black	-0.5	0.5
271	6	STAN	Black	-0.5	0.5
485	5.33333	STAN	White Matched	0.5	0.5
146	4.66667	STAN	White Matched	0.5	0.5
710	3.33333	STAN	Black	-0.5	0.5
551	2.33333	STAN	White Matched	0.5	0.5
251	2	STAN	White Matched	0.5	0.5
792	3	STAN	White Matched	0.5	0.5
495	3	STAN	White Matched	0.5	0.5
115	5	STAN	White Matched	0.5	0.5
291	4.33333	STAN	White Matched	0.5	0.5
649	3.66667	STAN	White Matched	0.5	0.5
437	4.66667	STAN	White Matched	0.5	0.5
737	4.66667	STAN	Black	-0.5	0.5
395	4	STAN	Black	-0.5	0.5
427	3.33333	STAN	Black	-0.5	0.5
315	5	STAN	Black	-0.5	0.5
554	3.33333	STAN	White Matched	0.5	0.5
306	4.33333	STAN	White Matched	0.5	0.5
732	3.66667	STAN	Black	-0.5	0.5
305	4	STAN	White Matched	0.5	0.5
170	3	STAN	Black	-0.5	0.5
105	3.33333	STAN	Black	-0.5	0.5
318	4.33333	STAN	Black	-0.5	0.5
20	4	STAN	White Matched	0.5	0.5
51	3.33333	STAN	White Matched	0.5	0.5
70	3.33333	STAN	White Matched	0.5	0.5
378	5	STAN	White Matched	0.5	0.5
79	3	STAN	Black	-0.5	0.5
15	5	STAN	Black	-0.5	0.5
53	4	STAN	Black	-0.5	0.5
69	3	STAN	White Matched	0.5	0.5
49	5	STAN	Black	-0.5	0.5
16	4.66667	STAN	Black	-0.5	0.5
77	2.66667	STAN	Black	-0.5	0.5
58	4.33333	STAN	White Matched	0.5	0.5
64	3	STAN	Black	-0.5	0.5
66	2.66667	STAN	White Matched	0.5	0.5
59	4.33333	STAN	White Matched	0.5	0.5
14	2.33333	STAN	White Matched	0.5	0.5
60	2	STAN	White Matched	0.5	0.5
40	6	STAN	Black	-0.5	0.5
31	5	STAN	White Matched	0.5	0.5
93	2.33333	STAN	White Matched	0.5	0.5
57	4.66667	STAN	Black	-0.5	0.5
43	4.66667	STAN	Black	-0.5	0.5
17	4.66667	STAN	White Matched	0.5	0.5
18	3.33333	STAN	White Matched	0.5	0.5
86	5	STAN	White Matched	0.5	0.5
23	2.66667	STAN	White Matched	0.5	0.5
10	5	STAN	White Matched	0.5	0.5
65	2	STAN	White Matched	0.5	0.5
1	2.33333	STAN	White Matched	0.5	0.5
75	2.33333	STAN	Black	-0.5	0.5
48	5	STAN	White Matched	0.5	0.5
30	4	STAN	White Matched	0.5	0.5
82	2.66667	STAN	White Matched	0.5	0.5
55	5	STAN	White Matched	0.5	0.5
24	2.66667	STAN	White Matched	0.5	0.5
80	4	STAN	White Matched	0.5	0.5
95	4	STAN	Black	-0.5	0.5
25	4	STAN	Black	-0.5	0.5
98	3.66667	STAN	White Matched	0.5	0.5
74	2.33333	STAN	White Matched	0.5	0.5
67	2.33333	STAN	Black	-0.5	0.5
62	3	STAN	White Matched	0.5	0.5
50	6.33333	STAN	Black	-0.5	0.5
42	4	STAN	White Matched	0.5	0.5
28	5.66667	STAN	Black	-0.5	0.5
68	4.66667	STAN	Black	-0.5	0.5
83	4.66667	STAN	Black	-0.5	0.5
61	2	STAN	Black	-0.5	0.5
13	3	STAN	Black	-0.5	0.5
56	5.33333	STAN	White Matched	0.5	0.5
81	3.66667	STAN	Black	-0.5	0.5
47	4	STAN	Black	-0.5	0.5
19	6.33333	STAN	White Matched	0.5	0.5
38	4.33333	STAN	Black	-0.5	0.5
22	2.66667	STAN	Black	-0.5	0.5
11	5	STAN	White Matched	0.5	0.5
34	4.66667	STAN	White Matched	0.5	0.5
72	2	STAN	White Matched	0.5	0.5
78	4.5	STAN	Black	-0.5	0.5
71	4.33333	STAN	Black	-0.5	0.5
21	3	STAN	White Matched	0.5	0.5
27	5	STAN	Black	-0.5	0.5
96	2.66667	STAN	White Matched	0.5	0.5
37	6	STAN	White Matched	0.5	0.5
8	4.33333	STAN	White Matched	0.5	0.5
46	3.33333	STAN	White Matched	0.5	0.5
92	4	STAN	White Matched	0.5	0.5
35	4	STAN	Black	-0.5	0.5
54	4.66667	STAN	White Matched	0.5	0.5
52	5	STAN	Black	-0.5	0.5
26	2.66667	STAN	White Matched	0.5	0.5
12	4	STAN	White Matched	0.5	0.5
44	5.66667	STAN	Black	-0.5	0.5
32	2	STAN	Black	-0.5	0.5
91	5.33333	STAN	White Matched	0.5	0.5
97	2.66667	STAN	White Matched	0.5	0.5
4	8.66667	STAN	Black	-0.5	0.5
33	3	STAN	White Matched	0.5	0.5
39	3	STAN	White Matched	0.5	0.5
29	4	STAN	White Matched	0.5	0.5
99	6.66667	STAN	White Matched	0.5	0.5
41	3.33333	STAN	White Matched	0.5	0.5
45	4.66667	STAN	Black	-0.5	0.5
100	5.66667	STAN	Black	-0.5	0.5
204	2.66667	STAN	White Matched	0.5	0.5
137	4	STAN	Black	-0.5	0.5
370	4.33333	STAN	Black	-0.5	0.5
149	5.33333	STAN	Black	-0.5	0.5
159	4.66667	STAN	White Matched	0.5	0.5
270	4.33333	STAN	Black	-0.5	0.5
191	4	STAN	Black	-0.5	0.5
299	4.66667	STAN	White Matched	0.5	0.5
579	3.66667	STAN	Black	-0.5	0.5
329	3.33333	STAN	White Matched	0.5	0.5
374	6	STAN	White Matched	0.5	0.5
460	4.33333	STAN	Black	-0.5	0.5
148	4.66667	STAN	Black	-0.5	0.5
255	3.66667	STAN	Black	-0.5	0.5
173	3.66667	STAN	Black	-0.5	0.5
486	3.66667	STAN	Black	-0.5	0.5
492	4.66667	STAN	White Matched	0.5	0.5
496	4.33333	STAN	White Matched	0.5	0.5
582	3.33333	STAN	White Matched	0.5	0.5
591	4.66667	STAN	Black	-0.5	0.5
84	3.33333	STAN	Black	-0.5	0.5
94	3.33333	STAN	Black	-0.5	0.5
285	7	STAN	Black	-0.5	0.5
631	5	STAN	Black	-0.5	0.5
89	2.66667	STAN	White Matched	0.5	0.5
422	2.66667	STAN	White Matched	0.5	0.5
221	4.33333	STAN	White Matched	0.5	0.5
484	4.33333	STAN	White Matched	0.5	0.5
349	3	STAN	Black	-0.5	0.5
724	6.66667	STAN	White Matched	0.5	0.5
505	6.66667	STAN	White Matched	0.5	0.5
362	6.33333	STAN	White Matched	0.5	0.5
278	3.66667	STAN	Black	-0.5	0.5
282	4.33333	STAN	Black	-0.5	0.5
610	7.66667	STAN	Black	-0.5	0.5
614	9	STAN	Black	-0.5	0.5
76	5.66667	STAN	Black	-0.5	0.5
73	3.33333	STAN	Black	-0.5	0.5
87	5.33333	STAN	Black	-0.5	0.5
88	5.33333	STAN	Black	-0.5	0.5
2	4.66667	STAN	Black	-0.5	0.5
5	7	STAN	Black	-0.5	0.5
7	4	STAN	Black	-0.5	0.5
9	2	STAN	Black	-0.5	0.5
36	3	STAN	Black	-0.5	0.5
63	3.33333	STAN	Black	-0.5	0.5
85	3.66667	STAN	Black	-0.5	0.5
3	3.66667	STAN	Black	-0.5	0.5
6	3	STAN	Black	-0.5	0.5
580	1.66667	STAN	Black	-0.5	0.5
795	3.66667	STAN	Black	-0.5	0.5
625	3.66667	STAN	Black	-0.5	0.5
626	3.33333	STAN	Black	-0.5	0.5
730	4.66667	STAN	White Matched	0.5	0.5
768	2.66667	STAN	Black	-0.5	0.5
769	2.33333	STAN	White Matched	0.5	0.5
613	4.33333	ANON	White Matched	0.5	-0.5
338	5	ANON	Black	-0.5	-0.5
793	3.33333	ANON	White Matched	0.5	-0.5
206	5	ANON	White Matched	0.5	-0.5
452	4	ANON	White Matched	0.5	-0.5
654	3.66667	ANON	Black	-0.5	-0.5
134	3.66667	ANON	White Matched	0.5	-0.5
775	4.66667	ANON	White Matched	0.5	-0.5
542	4.66667	ANON	White Matched	0.5	-0.5
703	5.33333	ANON	White Matched	0.5	-0.5
566	3	ANON	Black	-0.5	-0.5
607	3	ANON	White Matched	0.5	-0.5
521	4	ANON	Black	-0.5	-0.5
250	2.66667	ANON	Black	-0.5	-0.5
713	5.66667	ANON	White Matched	0.5	-0.5
599	4	ANON	Black	-0.5	-0.5
383	5.33333	ANON	White Matched	0.5	-0.5
632	3	ANON	White Matched	0.5	-0.5
187	5	ANON	White Matched	0.5	-0.5
281	3.33333	ANON	Black	-0.5	-0.5
773	3.66667	ANON	White Matched	0.5	-0.5
657	5	ANON	White Matched	0.5	-0.5
604	2.33333	ANON	Black	-0.5	-0.5
714	4.5	ANON	Black	-0.5	-0.5
564	3.33333	ANON	White Matched	0.5	-0.5
705	4.66667	ANON	Black	-0.5	-0.5
674	7.33333	ANON	Black	-0.5	-0.5
352	2.66667	ANON	Black	-0.5	-0.5
532	5.66667	ANON	White Matched	0.5	-0.5
692	5	ANON	Black	-0.5	-0.5
256	5.33333	ANON	Black	-0.5	-0.5
796	2.33333	ANON	White Matched	0.5	-0.5
397	3.33333	ANON	White Matched	0.5	-0.5
637	1.66667	ANON	White Matched	0.5	-0.5
372	6	ANON	Black	-0.5	-0.5
183	5	ANON	White Matched	0.5	-0.5
497	3.66667	ANON	Black	-0.5	-0.5
307	3	ANON	White Matched	0.5	-0.5
247	4.33333	ANON	White Matched	0.5	-0.5
616	5.66667	ANON	White Matched	0.5	-0.5
188	5.33333	ANON	Black	-0.5	-0.5
550	2.33333	ANON	White Matched	0.5	-0.5
119	5.66667	ANON	Black	-0.5	-0.5
279	2.33333	ANON	Black	-0.5	-0.5
203	6.33333	ANON	White Matched	0.5	-0.5
407	5.66667	ANON	Black	-0.5	-0.5
498	4.66667	ANON	Black	-0.5	-0.5
592	4	ANON	Black	-0.5	-0.5
799	4	ANON	Black	-0.5	-0.5
107	5.33333	ANON	White Matched	0.5	-0.5
681	2.33333	ANON	Black	-0.5	-0.5
543	3.5	ANON	White Matched	0.5	-0.5
110	5	ANON	White Matched	0.5	-0.5
165	5.5	ANON	White Matched	0.5	-0.5
718	4	ANON	White Matched	0.5	-0.5
529	5	ANON	Black	-0.5	-0.5
450	4.66667	ANON	Black	-0.5	-0.5
549	4	ANON	Black	-0.5	-0.5
462	4	ANON	Black	-0.5	-0.5
284	3	ANON	Black	-0.5	-0.5
715	2.5	ANON	White Matched	0.5	-0.5
712	6	ANON	White Matched	0.5	-0.5
707	2.66667	ANON	Black	-0.5	-0.5
494	5.66667	ANON	White Matched	0.5	-0.5
508	5	ANON	Black	-0.5	-0.5
536	4	ANON	White Matched	0.5	-0.5
573	2.33333	ANON	Black	-0.5	-0.5
401	3.33333	ANON	White Matched	0.5	-0.5
233	3.33333	ANON	Black	-0.5	-0.5
398	4.33333	ANON	White Matched	0.5	-0.5
531	2.66667	ANON	Black	-0.5	-0.5
682	2	ANON	Black	-0.5	-0.5
596	3.33333	ANON	White Matched	0.5	-0.5
387	2	ANON	White Matched	0.5	-0.5
584	3	ANON	White Matched	0.5	-0.5
461	4.66667	ANON	White Matched	0.5	-0.5
311	4.66667	ANON	White Matched	0.5	-0.5
440	3	ANON	White Matched	0.5	-0.5
463	4.66667	ANON	Black	-0.5	-0.5
264	4	ANON	Black	-0.5	-0.5
375	3	ANON	Black	-0.5	-0.5
214	6	ANON	Black	-0.5	-0.5
339	6	ANON	White Matched	0.5	-0.5
678	3.66667	ANON	White Matched	0.5	-0.5
414	3.33333	ANON	White Matched	0.5	-0.5
286	3.33333	ANON	White Matched	0.5	-0.5
425	3.33333	ANON	Black	-0.5	-0.5
288	6	ANON	White Matched	0.5	-0.5
263	3.66667	ANON	White Matched	0.5	-0.5
323	4	ANON	Black	-0.5	-0.5
506	5.66667	ANON	Black	-0.5	-0.5
514	5.33333	ANON	Black	-0.5	-0.5
361	4.33333	ANON	White Matched	0.5	-0.5
213	3.33333	ANON	White Matched	0.5	-0.5
671	4.33333	ANON	White Matched	0.5	-0.5
224	5	ANON	White Matched	0.5	-0.5
242	4.5	ANON	White Matched	0.5	-0.5
689	4	ANON	Black	-0.5	-0.5
645	4.66667	ANON	Black	-0.5	-0.5
266	3.33333	ANON	Black	-0.5	-0.5
207	3	ANON	Black	-0.5	-0.5
368	4	ANON	Black	-0.5	-0.5
272	5	ANON	White Matched	0.5	-0.5
172	3.5	ANON	Black	-0.5	-0.5
193	5.66667	ANON	Black	-0.5	-0.5
161	5.66667	ANON	White Matched	0.5	-0.5
524	5.66667	ANON	Black	-0.5	-0.5
749	6.66667	ANON	Black	-0.5	-0.5
133	2.33333	ANON	White Matched	0.5	-0.5
359	2.66667	ANON	Black	-0.5	-0.5
639	4.33333	ANON	White Matched	0.5	-0.5
112	5	ANON	Black	-0.5	-0.5
606	4.33333	ANON	White Matched	0.5	-0.5
720	3.33333	ANON	White Matched	0.5	-0.5
545	4	ANON	Black	-0.5	-0.5
571	6.33333	ANON	Black	-0.5	-0.5
482	3.33333	ANON	White Matched	0.5	-0.5
304	3.66667	ANON	White Matched	0.5	-0.5
120	4.33333	ANON	Black	-0.5	-0.5
154	4	ANON	Black	-0.5	-0.5
774	4.66667	ANON	Black	-0.5	-0.5
238	5	ANON	White Matched	0.5	-0.5
548	3.33333	ANON	Black	-0.5	-0.5
215	7.33333	ANON	Black	-0.5	-0.5
663	4.33333	ANON	White Matched	0.5	-0.5
659	4.33333	ANON	White Matched	0.5	-0.5
275	3	ANON	White Matched	0.5	-0.5
504	5.33333	ANON	White Matched	0.5	-0.5
761	3.66667	ANON	White Matched	0.5	-0.5
699	4	ANON	White Matched	0.5	-0.5
694	5.33333	ANON	Black	-0.5	-0.5
405	3.66667	ANON	Black	-0.5	-0.5
557	4.66667	ANON	Black	-0.5	-0.5
302	5	ANON	White Matched	0.5	-0.5
577	4.66667	ANON	Black	-0.5	-0.5
480	3.66667	ANON	White Matched	0.5	-0.5
777	5	ANON	Black	-0.5	-0.5
527	4	ANON	White Matched	0.5	-0.5
326	3.66667	ANON	White Matched	0.5	-0.5
628	4.66667	ANON	Black	-0.5	-0.5
139	4.33333	ANON	Black	-0.5	-0.5
502	5.33333	ANON	White Matched	0.5	-0.5
294	5	ANON	White Matched	0.5	-0.5
752	3.66667	ANON	Black	-0.5	-0.5
219	3.66667	ANON	Black	-0.5	-0.5
457	4.66667	ANON	White Matched	0.5	-0.5
223	5.66667	ANON	White Matched	0.5	-0.5
404	4	ANON	Black	-0.5	-0.5
467	5	ANON	White Matched	0.5	-0.5
734	5.66667	ANON	White Matched	0.5	-0.5
619	5.33333	ANON	Black	-0.5	-0.5
731	2.66667	ANON	White Matched	0.5	-0.5
686	4.66667	ANON	Black	-0.5	-0.5
156	5.33333	ANON	White Matched	0.5	-0.5
533	2.33333	ANON	White Matched	0.5	-0.5
346	5.66667	ANON	White Matched	0.5	-0.5
477	4.66667	ANON	White Matched	0.5	-0.5
762	3	ANON	White Matched	0.5	-0.5
225	4.66667	ANON	Black	-0.5	-0.5
781	3.33333	ANON	White Matched	0.5	-0.5
180	4.33333	ANON	Black	-0.5	-0.5
394	4	ANON	White Matched	0.5	-0.5
677	3	ANON	Black	-0.5	-0.5
651	4	ANON	Black	-0.5	-0.5
481	3.66667	ANON	White Matched	0.5	-0.5
483	4.66667	ANON	White Matched	0.5	-0.5
501	5.33333	ANON	White Matched	0.5	-0.5
340	5.66667	ANON	White Matched	0.5	-0.5
464	5.33333	ANON	Black	-0.5	-0.5
424	3	ANON	Black	-0.5	-0.5
353	5	ANON	Black	-0.5	-0.5
534	3.66667	ANON	Black	-0.5	-0.5
334	5.33333	ANON	White Matched	0.5	-0.5
174	3.33333	ANON	Black	-0.5	-0.5
583	3.33333	ANON	Black	-0.5	-0.5
143	3	ANON	White Matched	0.5	-0.5
438	3.33333	ANON	White Matched	0.5	-0.5
570	3.33333	ANON	Black	-0.5	-0.5
717	4.33333	ANON	Black	-0.5	-0.5
409	3.33333	ANON	White Matched	0.5	-0.5
432	5.33333	ANON	White Matched	0.5	-0.5
474	4.66667	ANON	Black	-0.5	-0.5
624	2.66667	ANON	Black	-0.5	-0.5
403	5	ANON	White Matched	0.5	-0.5
210	4	ANON	White Matched	0.5	-0.5
303	5	ANON	White Matched	0.5	-0.5
111	2	ANON	White Matched	0.5	-0.5
392	1.66667	ANON	White Matched	0.5	-0.5
448	4.66667	ANON	Black	-0.5	-0.5
178	6	ANON	Black	-0.5	-0.5
709	5.66667	ANON	White Matched	0.5	-0.5
319	4	ANON	White Matched	0.5	-0.5
292	4.66667	ANON	Black	-0.5	-0.5
800	3.33333	ANON	Black	-0.5	-0.5
441	5	ANON	White Matched	0.5	-0.5
248	5.33333	ANON	Black	-0.5	-0.5
336	5	ANON	White Matched	0.5	-0.5
641	4.33333	ANON	Black	-0.5	-0.5
118	5.33333	ANON	White Matched	0.5	-0.5
574	4	ANON	White Matched	0.5	-0.5
142	5.33333	ANON	Black	-0.5	-0.5
561	2.33333	ANON	White Matched	0.5	-0.5
453	3.33333	ANON	White Matched	0.5	-0.5
347	4	ANON	White Matched	0.5	-0.5
652	3.33333	ANON	White Matched	0.5	-0.5
465	3.33333	ANON	Black	-0.5	-0.5
442	6.33333	ANON	White Matched	0.5	-0.5
608	3.66667	ANON	Black	-0.5	-0.5
693	5.33333	ANON	Black	-0.5	-0.5
212	5.33333	ANON	Black	-0.5	-0.5
135	4	ANON	White Matched	0.5	-0.5
289	7.33333	ANON	White Matched	0.5	-0.5
476	2.33333	ANON	Black	-0.5	-0.5
609	3.33333	ANON	White Matched	0.5	-0.5
520	5	ANON	Black	-0.5	-0.5
472	4.66667	ANON	White Matched	0.5	-0.5
650	3	ANON	Black	-0.5	-0.5
636	1.33333	ANON	White Matched	0.5	-0.5
745	4.33333	ANON	Black	-0.5	-0.5
750	3.33333	ANON	White Matched	0.5	-0.5
322	5.66667	ANON	Black	-0.5	-0.5
197	4.66667	ANON	White Matched	0.5	-0.5
471	4.66667	ANON	White Matched	0.5	-0.5
552	5	ANON	White Matched	0.5	-0.5
794	3.33333	ANON	Black	-0.5	-0.5
419	4	ANON	Black	-0.5	-0.5
348	3.33333	ANON	Black	-0.5	-0.5
735	2.66667	ANON	Black	-0.5	-0.5
237	5.33333	ANON	Black	-0.5	-0.5
544	6	ANON	White Matched	0.5	-0.5
181	5.33333	ANON	Black	-0.5	-0.5
106	3.33333	ANON	White Matched	0.5	-0.5
620	6.33333	ANON	Black	-0.5	-0.5
229	6	ANON	Black	-0.5	-0.5
103	4.66667	ANON	Black	-0.5	-0.5
240	5.66667	ANON	White Matched	0.5	-0.5
117	2.33333	ANON	Black	-0.5	-0.5
406	4	ANON	Black	-0.5	-0.5
697	5.33333	ANON	Black	-0.5	-0.5
546	5.5	ANON	White Matched	0.5	-0.5
200	5.66667	ANON	White Matched	0.5	-0.5
753	5	ANON	White Matched	0.5	-0.5
558	3.66667	ANON	White Matched	0.5	-0.5
176	3	ANON	Black	-0.5	-0.5
458	4.33333	ANON	White Matched	0.5	-0.5
562	2.66667	ANON	White Matched	0.5	-0.5
539	4.66667	ANON	Black	-0.5	-0.5
175	4.33333	ANON	Black	-0.5	-0.5
171	4	ANON	Black	-0.5	-0.5
783	3.66667	ANON	Black	-0.5	-0.5
499	4.33333	ANON	White Matched	0.5	-0.5
249	3.66667	ANON	Black	-0.5	-0.5
366	4	ANON	White Matched	0.5	-0.5
151	4.33333	ANON	Black	-0.5	-0.5
518	5.33333	ANON	Black	-0.5	-0.5
764	2.33333	ANON	Black	-0.5	-0.5
788	4.33333	ANON	Black	-0.5	-0.5
301	3.33333	ANON	Black	-0.5	-0.5
666	4.33333	ANON	White Matched	0.5	-0.5
479	2	ANON	White Matched	0.5	-0.5
716	3.33333	ANON	White Matched	0.5	-0.5
243	3.33333	ANON	Black	-0.5	-0.5
634	3.66667	ANON	White Matched	0.5	-0.5
665	2	ANON	White Matched	0.5	-0.5
101	5	ANON	White Matched	0.5	-0.5
439	4.66667	ANON	White Matched	0.5	-0.5
770	3.66667	ANON	Black	-0.5	-0.5
260	2.33333	ANON	White Matched	0.5	-0.5
766	3.66667	ANON	Black	-0.5	-0.5
587	2.66667	ANON	Black	-0.5	-0.5
789	2.66667	ANON	Black	-0.5	-0.5
350	4.33333	ANON	Black	-0.5	-0.5
345	4.33333	ANON	Black	-0.5	-0.5
380	5.33333	ANON	White Matched	0.5	-0.5
376	5.33333	ANON	White Matched	0.5	-0.5
199	6	ANON	White Matched	0.5	-0.5
736	4	ANON	White Matched	0.5	-0.5
235	3.33333	ANON	Black	-0.5	-0.5
547	2	ANON	White Matched	0.5	-0.5
131	4.33333	ANON	Black	-0.5	-0.5
365	2	ANON	Black	-0.5	-0.5
511	3.66667	ANON	Black	-0.5	-0.5
489	4.33333	ANON	White Matched	0.5	-0.5
90	2.66667	ANON	Black	-0.5	-0.5
611	4	ANON	White Matched	0.5	-0.5
470	2	ANON	Black	-0.5	-0.5
379	4	ANON	Black	-0.5	-0.5
780	3.33333	ANON	Black	-0.5	-0.5
748	2.33333	ANON	White Matched	0.5	-0.5
643	5.66667	ANON	Black	-0.5	-0.5
629	3	ANON	White Matched	0.5	-0.5
127	4.66667	ANON	Black	-0.5	-0.5
258	4.66667	ANON	White Matched	0.5	-0.5
556	4.66667	ANON	Black	-0.5	-0.5
226	4	ANON	Black	-0.5	-0.5
351	5.66667	ANON	White Matched	0.5	-0.5
273	2.33333	ANON	Black	-0.5	-0.5
246	4.33333	ANON	White Matched	0.5	-0.5
598	3.66667	ANON	Black	-0.5	-0.5
418	3.66667	ANON	Black	-0.5	-0.5
763	2	ANON	White Matched	0.5	-0.5
259	4	ANON	White Matched	0.5	-0.5
456	5.33333	ANON	Black	-0.5	-0.5
662	4.33333	ANON	Black	-0.5	-0.5
779	5.66667	ANON	Black	-0.5	-0.5
589	4.33333	ANON	Black	-0.5	-0.5
600	6	ANON	Black	-0.5	-0.5
400	3.33333	ANON	White Matched	0.5	-0.5
189	3	ANON	White Matched	0.5	-0.5
790	3.33333	ANON	White Matched	0.5	-0.5
565	2.66667	ANON	White Matched	0.5	-0.5
324	4.66667	ANON	White Matched	0.5	-0.5
526	3.33333	ANON	White Matched	0.5	-0.5
384	4.33333	ANON	Black	-0.5	-0.5
158	4.33333	ANON	Black	-0.5	-0.5
535	2.66667	ANON	Black	-0.5	-0.5
109	5.66667	ANON	White Matched	0.5	-0.5
523	3.33333	ANON	White Matched	0.5	-0.5
601	5.33333	ANON	Black	-0.5	-0.5
487	3.66667	ANON	White Matched	0.5	-0.5
417	2	ANON	Black	-0.5	-0.5
488	4.66667	ANON	White Matched	0.5	-0.5
530	5	ANON	Black	-0.5	-0.5
648	4.66667	ANON	Black	-0.5	-0.5
114	3.33333	ANON	White Matched	0.5	-0.5
603	3	ANON	Black	-0.5	-0.5
755	4	ANON	Black	-0.5	-0.5
722	3	ANON	White Matched	0.5	-0.5
358	3.66667	ANON	Black	-0.5	-0.5
342	3.66667	ANON	White Matched	0.5	-0.5
327	4.66667	ANON	White Matched	0.5	-0.5
390	3	ANON	White Matched	0.5	-0.5
313	4.33333	ANON	White Matched	0.5	-0.5
230	4.66667	ANON	White Matched	0.5	-0.5
760	3.33333	ANON	Black	-0.5	-0.5
155	5.33333	ANON	Black	-0.5	-0.5
661	4.66667	ANON	Black	-0.5	-0.5
296	2.33333	ANON	White Matched	0.5	-0.5
525	2.66667	ANON	Black	-0.5	-0.5
179	2.33333	ANON	Black	-0.5	-0.5
153	4	ANON	White Matched	0.5	-0.5
454	4.66667	ANON	Black	-0.5	-0.5
208	4.33333	ANON	Black	-0.5	-0.5
309	3.66667	ANON	White Matched	0.5	-0.5
700	5.66667	ANON	Black	-0.5	-0.5
157	3	ANON	Black	-0.5	-0.5
126	5	ANON	Black	-0.5	-0.5
507	3.66667	ANON	White Matched	0.5	-0.5
787	3.66667	ANON	Black	-0.5	-0.5
676	4.66667	ANON	Black	-0.5	-0.5
244	2.66667	ANON	White Matched	0.5	-0.5
618	5	ANON	White Matched	0.5	-0.5
300	6.33333	ANON	Black	-0.5	-0.5
772	4.33333	ANON	White Matched	0.5	-0.5
742	3	ANON	Black	-0.5	-0.5
680	6	ANON	Black	-0.5	-0.5
182	6.33333	ANON	Black	-0.5	-0.5
683	4	ANON	Black	-0.5	-0.5
245	4	ANON	Black	-0.5	-0.5
184	3.66667	ANON	Black	-0.5	-0.5
195	4	ANON	White Matched	0.5	-0.5
321	3.33333	ANON	White Matched	0.5	-0.5
615	5.66667	ANON	Black	-0.5	-0.5
500	4.33333	ANON	White Matched	0.5	-0.5
776	2	ANON	White Matched	0.5	-0.5
337	4.33333	ANON	White Matched	0.5	-0.5
239	4.66667	ANON	White Matched	0.5	-0.5
393	5	ANON	White Matched	0.5	-0.5
385	4.66667	ANON	White Matched	0.5	-0.5
428	3.33333	ANON	Black	-0.5	-0.5
332	5.33333	ANON	Black	-0.5	-0.5
274	5	ANON	Black	-0.5	-0.5
572	3.33333	ANON	White Matched	0.5	-0.5
320	5	ANON	White Matched	0.5	-0.5
408	3.66667	ANON	Black	-0.5	-0.5
446	4.66667	ANON	White Matched	0.5	-0.5
415	3	ANON	Black	-0.5	-0.5
293	3.66667	ANON	White Matched	0.5	-0.5
356	2.33333	ANON	White Matched	0.5	-0.5
706	7	ANON	White Matched	0.5	-0.5
436	5.33333	ANON	White Matched	0.5	-0.5
113	3.66667	ANON	White Matched	0.5	-0.5
673	5	ANON	Black	-0.5	-0.5
519	2	ANON	White Matched	0.5	-0.5
316	4	ANON	White Matched	0.5	-0.5
201	4	ANON	White Matched	0.5	-0.5
283	4.33333	ANON	Black	-0.5	-0.5
679	5	ANON	Black	-0.5	-0.5
786	4	ANON	White Matched	0.5	-0.5
578	4	ANON	White Matched	0.5	-0.5
128	1.66667	ANON	White Matched	0.5	-0.5
168	3.66667	ANON	Black	-0.5	-0.5
314	2.66667	ANON	White Matched	0.5	-0.5
638	3	ANON	White Matched	0.5	-0.5
642	2	ANON	Black	-0.5	-0.5
169	3.66667	ANON	Black	-0.5	-0.5
727	3	ANON	White Matched	0.5	-0.5
449	4.33333	ANON	Black	-0.5	-0.5
516	4.66667	ANON	Black	-0.5	-0.5
466	3.66667	ANON	White Matched	0.5	-0.5
740	5	ANON	Black	-0.5	-0.5
585	3.66667	ANON	White Matched	0.5	-0.5
444	4.66667	ANON	White Matched	0.5	-0.5
217	4.66667	ANON	White Matched	0.5	-0.5
262	2.66667	ANON	White Matched	0.5	-0.5
510	5	ANON	Black	-0.5	-0.5
298	5	ANON	Black	-0.5	-0.5
725	3.33333	ANON	Black	-0.5	-0.5
211	4.66667	ANON	White Matched	0.5	-0.5
459	5	ANON	White Matched	0.5	-0.5
185	5.33333	ANON	Black	-0.5	-0.5
234	2.33333	ANON	White Matched	0.5	-0.5
190	6	ANON	White Matched	0.5	-0.5
443	3.66667	ANON	White Matched	0.5	-0.5
785	3.33333	ANON	Black	-0.5	-0.5
517	4	ANON	Black	-0.5	-0.5
597	3.33333	ANON	Black	-0.5	-0.5
765	3	ANON	White Matched	0.5	-0.5
729	6	ANON	White Matched	0.5	-0.5
144	3.66667	ANON	Black	-0.5	-0.5
287	3.66667	ANON	Black	-0.5	-0.5
141	3.66667	ANON	White Matched	0.5	-0.5
399	3.66667	ANON	White Matched	0.5	-0.5
396	2.33333	ANON	White Matched	0.5	-0.5
445	6	ANON	Black	-0.5	-0.5
475	5	ANON	Black	-0.5	-0.5
411	5.33333	ANON	White Matched	0.5	-0.5
627	4.66667	ANON	Black	-0.5	-0.5
209	4	ANON	Black	-0.5	-0.5
434	4.66667	ANON	Black	-0.5	-0.5
555	1.33333	ANON	Black	-0.5	-0.5
698	4	ANON	Black	-0.5	-0.5
660	3.33333	ANON	White Matched	0.5	-0.5
447	3.66667	ANON	White Matched	0.5	-0.5
771	3.33333	ANON	Black	-0.5	-0.5
655	3.66667	ANON	White Matched	0.5	-0.5
241	4.33333	ANON	White Matched	0.5	-0.5
236	4	ANON	White Matched	0.5	-0.5
382	5	ANON	Black	-0.5	-0.5
116	3	ANON	Black	-0.5	-0.5
647	4	ANON	White Matched	0.5	-0.5
711	3.33333	ANON	Black	-0.5	-0.5
140	5	ANON	White Matched	0.5	-0.5
228	5.33333	ANON	White Matched	0.5	-0.5
512	4	ANON	White Matched	0.5	-0.5
708	5.5	ANON	Black	-0.5	-0.5
759	4.33333	ANON	Black	-0.5	-0.5
232	4.33333	ANON	White Matched	0.5	-0.5
276	4.33333	ANON	White Matched	0.5	-0.5
741	3.33333	ANON	Black	-0.5	-0.5
108	5.33333	ANON	Black	-0.5	-0.5
719	5	ANON	White Matched	0.5	-0.5
253	3	ANON	White Matched	0.5	-0.5
312	5.33333	ANON	Black	-0.5	-0.5
522	4.66667	ANON	Black	-0.5	-0.5
317	3.33333	ANON	Black	-0.5	-0.5
367	6	ANON	Black	-0.5	-0.5
265	2.66667	ANON	White Matched	0.5	-0.5
756	3.33333	ANON	White Matched	0.5	-0.5
695	2.66667	ANON	Black	-0.5	-0.5
528	2	ANON	White Matched	0.5	-0.5
758	4	ANON	Black	-0.5	-0.5
167	5	ANON	Black	-0.5	-0.5
330	5.66667	ANON	Black	-0.5	-0.5
784	2.33333	ANON	Black	-0.5	-0.5
622	4.33333	ANON	White Matched	0.5	-0.5
653	4	ANON	White Matched	0.5	-0.5
646	2	ANON	White Matched	0.5	-0.5
623	4.66667	ANON	White Matched	0.5	-0.5
605	3.66667	ANON	White Matched	0.5	-0.5
121	5.66667	ANON	Black	-0.5	-0.5
331	7.66667	ANON	White Matched	0.5	-0.5
102	5	ANON	Black	-0.5	-0.5
595	1.66667	ANON	Black	-0.5	-0.5
490	5	ANON	White Matched	0.5	-0.5
192	4	ANON	Black	-0.5	-0.5
435	4	ANON	White Matched	0.5	-0.5
685	3	ANON	White Matched	0.5	-0.5
767	5	ANON	Black	-0.5	-0.5
343	3.66667	ANON	White Matched	0.5	-0.5
797	5	ANON	White Matched	0.5	-0.5
640	3.66667	ANON	White Matched	0.5	-0.5
297	4.66667	ANON	White Matched	0.5	-0.5
478	4	ANON	White Matched	0.5	-0.5
357	5.33333	ANON	White Matched	0.5	-0.5
231	4	ANON	Black	-0.5	-0.5
389	2	ANON	Black	-0.5	-0.5
733	4.66667	ANON	Black	-0.5	-0.5
369	3.66667	ANON	Black	-0.5	-0.5
325	4	ANON	Black	-0.5	-0.5
593	3.66667	ANON	Black	-0.5	-0.5
560	1.66667	ANON	Black	-0.5	-0.5
743	4.33333	ANON	White Matched	0.5	-0.5
391	3.66667	ANON	White Matched	0.5	-0.5
635	5	ANON	Black	-0.5	-0.5
122	3	ANON	White Matched	0.5	-0.5
150	3.33333	ANON	Black	-0.5	-0.5
423	4.66667	ANON	Black	-0.5	-0.5
386	3.33333	ANON	White Matched	0.5	-0.5
669	3.33333	ANON	White Matched	0.5	-0.5
702	5.33333	ANON	White Matched	0.5	-0.5
590	2	ANON	Black	-0.5	-0.5
410	4	ANON	White Matched	0.5	-0.5
754	4.66667	ANON	Black	-0.5	-0.5
739	4	ANON	Black	-0.5	-0.5
261	7	ANON	Black	-0.5	-0.5
644	4	ANON	Black	-0.5	-0.5
612	4.33333	ANON	Black	-0.5	-0.5
455	2.66667	ANON	White Matched	0.5	-0.5
138	4.33333	ANON	White Matched	0.5	-0.5
540	3.33333	ANON	White Matched	0.5	-0.5
373	5	ANON	Black	-0.5	-0.5
360	3.33333	ANON	White Matched	0.5	-0.5
538	4	ANON	Black	-0.5	-0.5
152	5.66667	ANON	White Matched	0.5	-0.5
553	3.33333	ANON	White Matched	0.5	-0.5
268	5	ANON	Black	-0.5	-0.5
670	3.66667	ANON	White Matched	0.5	-0.5
747	5	ANON	Black	-0.5	-0.5
162	5.33333	ANON	White Matched	0.5	-0.5
728	3	ANON	White Matched	0.5	-0.5
468	3	ANON	White Matched	0.5	-0.5
738	4	ANON	Black	-0.5	-0.5
310	4	ANON	White Matched	0.5	-0.5
355	4.33333	ANON	Black	-0.5	-0.5
333	5.66667	ANON	Black	-0.5	-0.5
687	6.33333	ANON	Black	-0.5	-0.5
267	2.33333	ANON	Black	-0.5	-0.5
227	3.66667	ANON	Black	-0.5	-0.5
145	4.66667	ANON	White Matched	0.5	-0.5
568	3.33333	ANON	Black	-0.5	-0.5
581	5.66667	ANON	White Matched	0.5	-0.5
363	4.66667	ANON	Black	-0.5	-0.5
594	2.66667	ANON	White Matched	0.5	-0.5
166	3	ANON	Black	-0.5	-0.5
130	4.66667	ANON	White Matched	0.5	-0.5
123	5	ANON	White Matched	0.5	-0.5
202	7	ANON	White Matched	0.5	-0.5
421	4.33333	ANON	White Matched	0.5	-0.5
586	2.66667	ANON	White Matched	0.5	-0.5
280	2.66667	ANON	White Matched	0.5	-0.5
563	3.66667	ANON	Black	-0.5	-0.5
491	2.33333	ANON	Black	-0.5	-0.5
617	4	ANON	Black	-0.5	-0.5
381	3.66667	ANON	White Matched	0.5	-0.5
254	2.33333	ANON	Black	-0.5	-0.5
328	3	ANON	White Matched	0.5	-0.5
537	3.33333	ANON	White Matched	0.5	-0.5
559	3.66667	ANON	Black	-0.5	-0.5
354	3	ANON	Black	-0.5	-0.5
688	4.33333	ANON	White Matched	0.5	-0.5
429	6	ANON	White Matched	0.5	-0.5
726	4.33333	ANON	Black	-0.5	-0.5
667	5	ANON	White Matched	0.5	-0.5
177	4.66667	ANON	Black	-0.5	-0.5
194	4.33333	ANON	Black	-0.5	-0.5
431	5.66667	ANON	Black	-0.5	-0.5
252	3.33333	ANON	White Matched	0.5	-0.5
132	5.66667	ANON	Black	-0.5	-0.5
371	6	ANON	White Matched	0.5	-0.5
163	6.66667	ANON	White Matched	0.5	-0.5
277	4.33333	ANON	Black	-0.5	-0.5
515	3.33333	ANON	Black	-0.5	-0.5
257	3.66667	ANON	Black	-0.5	-0.5
751	3.66667	ANON	White Matched	0.5	-0.5
658	5.66667	ANON	Black	-0.5	-0.5
691	4	ANON	Black	-0.5	-0.5
295	3.66667	ANON	Black	-0.5	-0.5
186	3	ANON	White Matched	0.5	-0.5
513	6.33333	ANON	Black	-0.5	-0.5
503	4.66667	ANON	White Matched	0.5	-0.5
426	4.33333	ANON	Black	-0.5	-0.5
744	3	ANON	Black	-0.5	-0.5
196	4.33333	ANON	Black	-0.5	-0.5
493	3.33333	ANON	White Matched	0.5	-0.5
576	3	ANON	White Matched	0.5	-0.5
778	4.66667	ANON	White Matched	0.5	-0.5
757	3	ANON	White Matched	0.5	-0.5
588	4.66667	ANON	Black	-0.5	-0.5
696	5	ANON	White Matched	0.5	-0.5
569	3	ANON	White Matched	0.5	-0.5
473	1.66667	ANON	Black	-0.5	-0.5
412	4.33333	ANON	White Matched	0.5	-0.5
567	4.33333	ANON	Black	-0.5	-0.5
136	3	ANON	White Matched	0.5	-0.5
124	2.33333	ANON	White Matched	0.5	-0.5
509	5.66667	ANON	Black	-0.5	-0.5
433	4	ANON	Black	-0.5	-0.5
308	4.33333	ANON	White Matched	0.5	-0.5
147	5	ANON	White Matched	0.5	-0.5
721	3.33333	ANON	Black	-0.5	-0.5
451	3.66667	ANON	Black	-0.5	-0.5
630	5.66667	ANON	White Matched	0.5	-0.5
672	5.33333	ANON	Black	-0.5	-0.5
222	3.66667	ANON	Black	-0.5	-0.5
791	4	ANON	White Matched	0.5	-0.5
416	4.66667	ANON	White Matched	0.5	-0.5
420	6	ANON	White Matched	0.5	-0.5
723	2.66667	ANON	Black	-0.5	-0.5
220	3.33333	ANON	Black	-0.5	-0.5
402	5.66667	ANON	White Matched	0.5	-0.5
469	3	ANON	Black	-0.5	-0.5
621	1.66667	ANON	Black	-0.5	-0.5
668	4.33333	ANON	Black	-0.5	-0.5
290	3	ANON	Black	-0.5	-0.5
205	4	ANON	Black	-0.5	-0.5
675	3.66667	ANON	Black	-0.5	-0.5
344	3.33333	ANON	White Matched	0.5	-0.5
377	2.66667	ANON	White Matched	0.5	-0.5
684	5.66667	ANON	White Matched	0.5	-0.5
782	6	ANON	Black	-0.5	-0.5
160	4.33333	ANON	Black	-0.5	-0.5
125	3	ANON	White Matched	0.5	-0.5
575	4.33333	ANON	Black	-0.5	-0.5
656	3.33333	ANON	Black	-0.5	-0.5
701	2.66667	ANON	White Matched	0.5	-0.5
364	4	ANON	Black	-0.5	-0.5
218	2.33333	ANON	White Matched	0.5	-0.5
388	3.33333	ANON	White Matched	0.5	-0.5
633	4.33333	ANON	White Matched	0.5	-0.5
216	4.66667	ANON	Black	-0.5	-0.5
104	3.66667	ANON	Black	-0.5	-0.5
164	3.33333	ANON	Black	-0.5	-0.5
798	4.66667	ANON	White Matched	0.5	-0.5
430	3.66667	ANON	Black	-0.5	-0.5
129	2.66667	ANON	White Matched	0.5	-0.5
690	2.66667	ANON	White Matched	0.5	-0.5
541	3.33333	ANON	White Matched	0.5	-0.5
602	3	ANON	Black	-0.5	-0.5
335	4	ANON	White Matched	0.5	-0.5
198	5.66667	ANON	Black	-0.5	-0.5
664	3.33333	ANON	Black	-0.5	-0.5
704	4.33333	ANON	Black	-0.5	-0.5
746	6.33333	ANON	White Matched	0.5	-0.5
341	4	ANON	White Matched	0.5	-0.5
413	2.66667	ANON	Black	-0.5	-0.5
269	6.33333	ANON	Black	-0.5	-0.5
271	3.33333	ANON	Black	-0.5	-0.5
485	5.66667	ANON	White Matched	0.5	-0.5
146	3.66667	ANON	White Matched	0.5	-0.5
710	3.33333	ANON	Black	-0.5	-0.5
551	3.66667	ANON	White Matched	0.5	-0.5
251	2	ANON	White Matched	0.5	-0.5
792	5	ANON	White Matched	0.5	-0.5
495	5	ANON	White Matched	0.5	-0.5
115	3.33333	ANON	White Matched	0.5	-0.5
291	2.33333	ANON	White Matched	0.5	-0.5
649	5.33333	ANON	White Matched	0.5	-0.5
437	4.33333	ANON	White Matched	0.5	-0.5
737	4	ANON	Black	-0.5	-0.5
395	3.66667	ANON	Black	-0.5	-0.5
427	4	ANON	Black	-0.5	-0.5
315	4.33333	ANON	Black	-0.5	-0.5
554	2.33333	ANON	White Matched	0.5	-0.5
306	3	ANON	White Matched	0.5	-0.5
732	4.33333	ANON	Black	-0.5	-0.5
305	3.33333	ANON	White Matched	0.5	-0.5
170	2.33333	ANON	Black	-0.5	-0.5
105	4.66667	ANON	Black	-0.5	-0.5
318	4	ANON	Black	-0.5	-0.5
20	3.66667	ANON	White Matched	0.5	-0.5
51	4	ANON	White Matched	0.5	-0.5
70	4	ANON	White Matched	0.5	-0.5
378	3.33333	ANON	White Matched	0.5	-0.5
79	3	ANON	Black	-0.5	-0.5
15	3	ANON	Black	-0.5	-0.5
53	2.66667	ANON	Black	-0.5	-0.5
69	2.66667	ANON	White Matched	0.5	-0.5
49	4.66667	ANON	Black	-0.5	-0.5
16	3.66667	ANON	Black	-0.5	-0.5
77	3	ANON	Black	-0.5	-0.5
58	4.33333	ANON	White Matched	0.5	-0.5
64	3	ANON	Black	-0.5	-0.5
66	2	ANON	White Matched	0.5	-0.5
59	5	ANON	White Matched	0.5	-0.5
14	5	ANON	White Matched	0.5	-0.5
60	2.33333	ANON	White Matched	0.5	-0.5
40	6	ANON	Black	-0.5	-0.5
31	3	ANON	White Matched	0.5	-0.5
93	4	ANON	White Matched	0.5	-0.5
57	4	ANON	Black	-0.5	-0.5
43	5	ANON	Black	-0.5	-0.5
17	3	ANON	White Matched	0.5	-0.5
18	2.66667	ANON	White Matched	0.5	-0.5
86	4.66667	ANON	White Matched	0.5	-0.5
23	2.66667	ANON	White Matched	0.5	-0.5
10	5.33333	ANON	White Matched	0.5	-0.5
65	3.33333	ANON	White Matched	0.5	-0.5
1	4.66667	ANON	White Matched	0.5	-0.5
75	3.66667	ANON	Black	-0.5	-0.5
48	5.33333	ANON	White Matched	0.5	-0.5
30	4	ANON	White Matched	0.5	-0.5
82	4.66667	ANON	White Matched	0.5	-0.5
55	4.33333	ANON	White Matched	0.5	-0.5
24	4	ANON	White Matched	0.5	-0.5
80	4.33333	ANON	White Matched	0.5	-0.5
95	3	ANON	Black	-0.5	-0.5
25	4.66667	ANON	Black	-0.5	-0.5
98	3	ANON	White Matched	0.5	-0.5
74	3.5	ANON	White Matched	0.5	-0.5
67	3.33333	ANON	Black	-0.5	-0.5
62	5	ANON	White Matched	0.5	-0.5
50	7.33333	ANON	Black	-0.5	-0.5
42	4	ANON	White Matched	0.5	-0.5
28	4.66667	ANON	Black	-0.5	-0.5
68	3	ANON	Black	-0.5	-0.5
83	4.33333	ANON	Black	-0.5	-0.5
61	3.66667	ANON	Black	-0.5	-0.5
13	3.66667	ANON	Black	-0.5	-0.5
56	5.33333	ANON	White Matched	0.5	-0.5
81	5.33333	ANON	Black	-0.5	-0.5
47	3.33333	ANON	Black	-0.5	-0.5
19	4	ANON	White Matched	0.5	-0.5
38	4	ANON	Black	-0.5	-0.5
22	4	ANON	Black	-0.5	-0.5
11	3	ANON	White Matched	0.5	-0.5
34	3.33333	ANON	White Matched	0.5	-0.5
72	3.66667	ANON	White Matched	0.5	-0.5
78	3.33333	ANON	Black	-0.5	-0.5
71	4.66667	ANON	Black	-0.5	-0.5
21	4.33333	ANON	White Matched	0.5	-0.5
27	4.66667	ANON	Black	-0.5	-0.5
96	5.66667	ANON	White Matched	0.5	-0.5
37	3	ANON	White Matched	0.5	-0.5
8	2	ANON	White Matched	0.5	-0.5
46	3.33333	ANON	White Matched	0.5	-0.5
92	3.33333	ANON	White Matched	0.5	-0.5
35	3	ANON	Black	-0.5	-0.5
54	5.33333	ANON	White Matched	0.5	-0.5
52	3.33333	ANON	Black	-0.5	-0.5
26	3.66667	ANON	White Matched	0.5	-0.5
12	3.66667	ANON	White Matched	0.5	-0.5
44	4.66667	ANON	Black	-0.5	-0.5
32	4.66667	ANON	Black	-0.5	-0.5
91	5.33333	ANON	White Matched	0.5	-0.5
97	3	ANON	White Matched	0.5	-0.5
4	8.33333	ANON	Black	-0.5	-0.5
33	3.66667	ANON	White Matched	0.5	-0.5
39	4.33333	ANON	White Matched	0.5	-0.5
29	3.66667	ANON	White Matched	0.5	-0.5
99	5.66667	ANON	White Matched	0.5	-0.5
41	3.33333	ANON	White Matched	0.5	-0.5
45	5	ANON	Black	-0.5	-0.5
100	6.33333	ANON	Black	-0.5	-0.5
204	2.66667	ANON	White Matched	0.5	-0.5
137	3	ANON	Black	-0.5	-0.5
370	4.33333	ANON	Black	-0.5	-0.5
149	5	ANON	Black	-0.5	-0.5
159	3.66667	ANON	White Matched	0.5	-0.5
270	4.66667	ANON	Black	-0.5	-0.5
191	4.66667	ANON	Black	-0.5	-0.5
299	5	ANON	White Matched	0.5	-0.5
579	3.33333	ANON	Black	-0.5	-0.5
329	3.66667	ANON	White Matched	0.5	-0.5
374	4	ANON	White Matched	0.5	-0.5
460	4.33333	ANON	Black	-0.5	-0.5
148	3.33333	ANON	Black	-0.5	-0.5
255	6.33333	ANON	Black	-0.5	-0.5
173	3	ANON	Black	-0.5	-0.5
486	3.66667	ANON	Black	-0.5	-0.5
492	4	ANON	White Matched	0.5	-0.5
496	4.66667	ANON	White Matched	0.5	-0.5
582	4.33333	ANON	White Matched	0.5	-0.5
591	5.33333	ANON	Black	-0.5	-0.5
84	3	ANON	Black	-0.5	-0.5
94	4.66667	ANON	Black	-0.5	-0.5
285	5	ANON	Black	-0.5	-0.5
631	4.33333	ANON	Black	-0.5	-0.5
89	4.33333	ANON	White Matched	0.5	-0.5
422	2.33333	ANON	White Matched	0.5	-0.5
221	5	ANON	White Matched	0.5	-0.5
484	4.33333	ANON	White Matched	0.5	-0.5
349	3.66667	ANON	Black	-0.5	-0.5
724	6.66667	ANON	White Matched	0.5	-0.5
505	6.33333	ANON	White Matched	0.5	-0.5
362	4.66667	ANON	White Matched	0.5	-0.5
278	3	ANON	Black	-0.5	-0.5
282	5	ANON	Black	-0.5	-0.5
610	8.33333	ANON	Black	-0.5	-0.5
614	8.66667	ANON	Black	-0.5	-0.5
76	4.33333	ANON	Black	-0.5	-0.5
73	4	ANON	Black	-0.5	-0.5
87	5.33333	ANON	Black	-0.5	-0.5
88	5	ANON	Black	-0.5	-0.5
2	4.33333	ANON	Black	-0.5	-0.5
5	6.5	ANON	Black	-0.5	-0.5
7	4	ANON	Black	-0.5	-0.5
9	2.33333	ANON	Black	-0.5	-0.5
36	3	ANON	Black	-0.5	-0.5
63	4	ANON	Black	-0.5	-0.5
85	3	ANON	Black	-0.5	-0.5
3	3.33333	ANON	Black	-0.5	-0.5
6	4.33333	ANON	Black	-0.5	-0.5
580	3.66667	ANON	Black	-0.5	-0.5
795	4.66667	ANON	Black	-0.5	-0.5
625	5.66667	ANON	Black	-0.5	-0.5
626	4.66667	ANON	Black	-0.5	-0.5
730	4.66667	ANON	White Matched	0.5	-0.5
768	3.66667	ANON	Black	-0.5	-0.5
769	3	ANON	White Matched	0.5	-0.5

## Sheet: Avg score per appl for contrast
prd_appl_id_anon2	stan.avg.overall.score	anon.avg.overall.score	dataset.group
922	4.33333	4.33333	White Matched
1117	5.66667	4.33333	White Random
500	3	5	Black
1193	3.66667	3.33333	White Matched
305	5	5	White Matched
682	3.33333	4	White Matched
819	2	2	White Random
165	2.33333	6.66667	White Random
988	3.66667	3	White Random
787	6.33333	4.33333	White Random
982	2.66667	3.66667	Black
902	3.33333	3.33333	White Random
205	4.33333	3.66667	White Matched
1171	1.33333	4.66667	White Matched
765	3.66667	5.33333	White Random
664	6.33333	4.66667	White Random
344	2	3	White Random
830	5.33333	4.66667	White Matched
1045	5.33333	5.33333	White Matched
1078	4	3	White Random
166	3	3.66667	White Random
864	2.33333	3	Black
916	3	3	White Matched
793	2.33333	4	Black
678	4.66667	4.66667	White Random
572	4	2.33333	White Random
412	4.66667	4	White Random
375	3	2.66667	Black
1060	5.33333	5.66667	White Matched
905	6.66667	4	Black
560	4.33333	5.33333	White Matched
948	3.33333	3	White Matched
278	3.33333	5	White Matched
430	3.33333	4.33333	White Random
424	3.66667	3.33333	Black
1168	3	3.66667	White Matched
985	6.66667	5	White Matched
400	2.33333	3.33333	White Random
911	1.33333	2.33333	Black
377	3.33333	3.33333	White Random
226	4.66667	3	White Random
1064	7	4.5	Black
861	2.66667	3.33333	White Matched
1048	3.33333	4.66667	Black
1010	5.33333	7.33333	Black
519	4	2.66667	Black
515	3.33333	5.66667	White Random
813	4.33333	5.66667	White Matched
1032	5.33333	5	Black
387	4.5	5.33333	Black
1196	3	2.33333	White Matched
583	3.66667	3.33333	White Matched
1000	6.5	2.66667	White Random
957	4	1.66667	White Matched
543	5.33333	6	Black
274	4	5	White Matched
755	5	3.66667	Black
457	4.5	3	White Matched
742	2.33333	3.33333	White Random
658	4.33333	4	White Random
371	5	4.33333	White Matched
925	3.33333	5.66667	White Matched
279	5	5.33333	Black
843	2	2.33333	White Matched
176	2.33333	5.66667	Black
422	3	2.33333	Black
301	5.33333	6.33333	White Matched
566	4.33333	4	White Random
756	3.66667	3.33333	White Random
602	4.33333	5.66667	Black
760	4.33333	3.33333	White Random
501	3.66667	5	White Random
758	3.66667	4.66667	Black
896	2.66667	4	Black
1199	3.66667	4	Black
141	2.66667	3.66667	White Random
153	4	5.33333	White Matched
761	4	4.66667	White Random
1020	6	2.33333	Black
831	2.33333	3.5	White Matched
157	2.33333	5	White Matched
251	4.33333	5.5	White Matched
1132	4.33333	4.33333	White Random
1070	3.66667	4	White Matched
808	4.66667	5	Black
677	4.66667	4.66667	Black
842	5.33333	4	Black
585	3.33333	3.66667	White Random
611	2.66667	2	White Random
472	3.33333	3.66667	White Random
695	4	4	Black
428	3.33333	3	Black
1065	1.66667	2.5	White Matched
1059	4.66667	6	White Matched
1053	3.66667	2.66667	Black
747	3.66667	5.66667	White Matched
775	4	5	Black
701	2	3	White Random
997	2	3	White Random
820	4.66667	4	White Matched
606	3.66667	2.33333	White Random
872	3	2.33333	Black
591	3	3.33333	White Matched
346	2	3.33333	Black
584	3.33333	4.33333	White Matched
812	3	2.66667	Black
1021	5.66667	2	Black
158	4	3.66667	White Random
901	2.33333	3.33333	White Matched
1049	3	3.33333	White Random
567	3	2	White Matched
884	5	3	White Matched
694	4	4.66667	White Matched
463	5.33333	4.66667	White Matched
659	4	3	White Matched
1014	3.66667	4.66667	White Random
696	3.33333	4.66667	Black
716	1.66667	4.33333	White Random
399	3.66667	4	Black
547	4	3	Black
316	4.66667	6	Black
749	1.66667	3	White Random
1063	4	3.33333	White Random
503	6	6	White Matched
821	2.33333	3.33333	White Random
213	3.5	4	White Random
1016	2.66667	3.66667	White Matched
616	4.66667	3.33333	White Matched
431	3.33333	3.33333	White Matched
633	3	3.33333	Black
357	2.66667	2.33333	White Random
544	2	3	White Random
433	5	6	White Matched
398	3.66667	3.66667	White Matched
480	3	4	Black
1067	4.33333	2.33333	White Random
772	6	5.66667	Black
783	3.33333	5.33333	Black
1036	3.66667	5	White Random
188	4.33333	4.66667	White Random
528	5	4.33333	White Matched
314	2	3.33333	White Matched
1007	4.66667	4.33333	White Matched
332	1.66667	5	White Matched
363	3.33333	4.5	White Matched
1029	4.66667	4	Black
967	4	4.66667	Black
404	3	3.33333	Black
306	3.33333	3	Black
352	4.33333	4.66667	White Random
458	3.66667	4	White Random
536	4.66667	4	Black
411	2.33333	5	White Matched
1012	4	3.33333	White Random
260	2.66667	3.5	Black
287	3	5.66667	Black
912	3	3.33333	White Random
244	4.33333	5.66667	White Matched
800	4	5.66667	Black
1135	6	6.66667	Black
203	2.66667	2.33333	White Matched
526	3.66667	2.66667	Black
959	6.66667	4.33333	White Matched
376	2.66667	3.66667	White Random
288	3.5	6	White Random
556	5.66667	7	White Random
168	4.66667	3	White Random
162	5	5	Black
343	2.66667	3.66667	White Random
915	3.33333	4.33333	White Matched
1075	2.33333	3.33333	White Matched
833	3	4	Black
869	4.33333	6.33333	Black
732	5	3.33333	White Matched
326	4.66667	5.33333	White Random
1108	3.66667	4.33333	White Random
453	5	3.66667	White Matched
380	2.33333	2	White Random
179	4.66667	4.33333	Black
693	5	3	White Random
448	3.33333	3.33333	White Random
236	5.33333	4	Black
601	4.33333	3.33333	White Random
1104	1.33333	2.66667	White Random
1169	4	4.66667	Black
354	5	5	White Matched
839	2.66667	3.33333	Black
317	5.33333	7.33333	Black
914	3.33333	4.66667	White Random
996	4	4.33333	White Matched
987	3.66667	4.33333	White Matched
417	3.33333	3	White Matched
770	3	5.33333	White Matched
1153	4	3.66667	White Matched
1041	3	4	White Matched
1034	3.66667	5.33333	Black
804	3.66667	3.33333	White Random
596	4	3.66667	Black
850	4.66667	4.66667	Black
451	5.33333	5	White Matched
877	2	4.66667	Black
729	5	3.66667	White Matched
1174	5	5	Black
807	3.66667	4	White Random
805	3	4	White Matched
590	3.66667	4.66667	White Random
614	3.33333	4.33333	White Random
486	4	3.66667	White Matched
841	2.33333	3.33333	White Random
943	4	4.66667	Black
210	4.33333	4.33333	Black
402	3.66667	5.33333	White Random
1096	3	3	White Random
341	4	4.33333	White Random
764	5.66667	5.33333	White Matched
156	4	6.33333	White Random
441	3.33333	5	White Matched
1139	3.66667	3.66667	Black
325	2	3.66667	Black
887	2.66667	3.66667	White Random
855	3.66667	4	White Random
689	4	4.66667	White Matched
331	5	5.66667	White Matched
595	3.33333	4	Black
349	4	4.33333	White Random
703	4.33333	5	White Matched
1110	4	5.66667	White Matched
712	4.33333	3.66667	White Random
178	3.33333	3.66667	White Random
931	4	5.33333	Black
1105	3.66667	2.66667	White Matched
1026	5.33333	4.66667	Black
840	4.33333	4.66667	White Random
717	6.66667	6.33333	White Random
238	5.33333	5.33333	White Matched
661	3.33333	4	White Random
978	3	3.33333	White Random
899	5.66667	6.33333	White Random
814	1.66667	2.33333	White Matched
942	1.66667	2.33333	White Random
511	4	5.66667	White Matched
720	4	4.66667	White Matched
1154	3	3	White Matched
333	4	4.66667	Black
1180	4	3.33333	White Matched
270	2.66667	4.33333	Black
579	4	4	White Matched
1015	4.66667	3	Black
976	3.33333	4	Black
730	3.66667	3.66667	White Matched
734	4.5	4.66667	White Matched
763	4	5.33333	White Matched
504	5.66667	5.66667	White Matched
1062	3.33333	4	White Random
698	5.66667	5.33333	Black
632	3.33333	3	Black
520	3.66667	5	Black
815	4	3.66667	Black
494	4.33333	5.33333	White Matched
262	5.66667	3.33333	Black
883	4	3.33333	Black
379	4	4.66667	White Random
612	3	5	White Random
216	3.33333	3	White Matched
1130	3	2.66667	White Random
655	5.66667	3.33333	White Matched
225	2.33333	2.66667	White Random
1099	5	3	White Random
392	2	4	White Random
868	4	3.33333	Black
1069	2	4.33333	Black
605	3	3.33333	White Matched
645	4.66667	5.33333	White Matched
1061	5	4	White Random
1138	2.66667	4.33333	White Random
574	4	2.33333	White Random
1125	4	5.33333	White Random
714	2.33333	4.66667	Black
938	3	2.66667	Black
450	6.33333	6.33333	White Random
860	4.33333	5.33333	White Random
502	2	5.66667	White Random
594	5	5	White Matched
309	4	4	White Matched
452	3.33333	5	White Matched
159	4.33333	2	White Matched
576	3.33333	1.66667	White Matched
599	2.33333	3.66667	White Random
549	3	2.66667	White Random
675	3.33333	4.66667	Black
267	8.66667	6	Black
1055	4.33333	5.66667	White Matched
475	4.66667	4	White Matched
438	5	4.66667	Black
1051	2.66667	3.33333	White Random
1200	3.66667	3.33333	Black
660	2.33333	5	White Matched
372	4.33333	5.33333	Black
497	4	5	White Matched
953	3	4	White Random
639	2.66667	3.33333	White Random
540	4.33333	5	White Random
467	3.66667	2.33333	White Random
889	2.33333	2.66667	White Random
995	3.66667	3	White Random
822	4	4.66667	White Random
961	3.5	4.33333	Black
173	5.66667	5.33333	White Matched
873	3.66667	4	White Matched
214	4.33333	5.33333	Black
857	1.66667	2.33333	White Matched
496	4.33333	3.66667	White Random
683	5	3.33333	White Matched
512	2.66667	4	White Matched
980	4.33333	3.33333	White Matched
929	4	4.33333	White Random
700	5	3.33333	Black
662	7	6.33333	White Matched
917	3	3.66667	Black
161	5	5.33333	White Random
1033	4.66667	5.33333	Black
723	5.33333	5.66667	White Random
255	2	4.66667	White Random
312	4.66667	5.33333	Black
206	3.33333	4	White Matched
945	5.66667	5	White Random
127	3	3	White Random
774	3.66667	4	White Random
434	6.66667	7.33333	White Matched
718	4.66667	2.33333	Black
918	3.66667	3.33333	White Matched
977	3.66667	4.33333	White Random
791	2.66667	5	Black
710	4	4.66667	White Matched
974	5.66667	3	Black
956	4	1.33333	White Matched
1127	4	4.33333	Black
1136	3	3.33333	White Matched
479	6	5.66667	Black
294	3.33333	4.66667	White Matched
708	5.33333	4.66667	White Matched
361	4.33333	3.66667	White Random
436	3.33333	3.66667	White Random
845	3.33333	5	White Matched
600	3	3.33333	White Random
1194	4	3.33333	Black
895	4	3.33333	White Random
624	2.33333	4	Black
513	4.33333	3.33333	Black
1111	3.66667	2.66667	Black
353	4.5	5.33333	Black
832	3	6	White Matched
1156	3	4	White Random
271	3.66667	5.33333	Black
1081	2.66667	2.66667	White Random
152	4.66667	3.33333	White Matched
932	5	6.33333	Black
969	4.33333	4.66667	White Random
245	4.33333	4	White Random
311	4	3.66667	White Random
339	4	6	Black
148	4.66667	4.66667	Black
227	4	5.33333	White Random
356	3.33333	5.66667	White Matched
171	5	2.33333	Black
621	3.33333	4.33333	White Random
598	2.33333	4	Black
1039	5	5.33333	Black
835	4	5.5	White Matched
298	6	5.66667	White Matched
374	4	2.66667	White Random
1141	5	5	White Matched
851	3.66667	3.66667	White Matched
413	5.66667	5.66667	White Random
265	4.66667	3	Black
690	5	4.33333	White Matched
858	2.33333	2.66667	White Matched
827	2.66667	4.66667	Black
263	5	4.33333	Black
259	3	4	Black
1182	4.33333	3.66667	Black
759	4	4.33333	White Matched
627	3	4.33333	White Random
1101	3	3	White Random
373	3	3.66667	Black
534	4.33333	4	White Matched
233	6	4.33333	Black
788	5	5.33333	Black
1158	4.33333	2.33333	Black
1187	4.33333	4.33333	Black
926	4.66667	3.66667	White Random
979	3.66667	6.33333	White Random
623	3.66667	2.33333	White Random
767	4.33333	3.33333	White Random
449	3.33333	3.33333	Black
440	4.66667	3.66667	White Random
1001	2	4.33333	White Matched
728	3.66667	2	White Matched
1066	6	3.33333	White Matched
367	1.66667	3.33333	Black
321	3	4.33333	White Random
954	3.33333	3.66667	White Matched
999	2.66667	2	White Matched
834	3.33333	3	White Random
146	6	5	White Matched
229	5	4.66667	White Random
657	3.66667	4.66667	White Matched
465	3.66667	4	White Random
1164	3	3.66667	Black
462	4.33333	4.66667	White Random
391	2.33333	2.33333	White Matched
1160	4	3.66667	Black
888	4	2.66667	Black
908	4.66667	6	White Random
329	5.33333	6.33333	White Random
670	5	4.66667	White Random
1188	3.66667	2.66667	Black
517	4	4.33333	Black
510	4.33333	4.33333	Black
538	5.33333	6.33333	White Random
554	3.66667	5.33333	White Matched
548	5	5.33333	White Matched
296	3.66667	6	White Matched
1114	3	4	White Matched
348	4	3.33333	Black
837	2.66667	2	White Matched
193	4.33333	3.66667	White Random
199	3	4.33333	Black
697	2.33333	3	White Random
304	2.66667	5	White Random
533	2	2	Black
780	3.66667	3.66667	Black
741	4	4.33333	White Matched
130	3.66667	2.66667	Black
920	3.66667	4	White Matched
707	4	2	Black
722	4.66667	4	White Random
553	4.33333	4	Black
1179	4.33333	3.33333	Black
1046	3.66667	5.66667	White Random
290	3	2.33333	White Random
1134	3.66667	2.33333	White Matched
965	5.33333	5.66667	Black
944	2.66667	3	White Matched
607	3	3.66667	White Random
1056	4	5	White Random
195	4.33333	4.66667	Black
874	1.66667	2.33333	White Random
593	4.66667	3.33333	White Random
508	2	3.66667	White Random
713	3.66667	3.66667	White Random
532	4.33333	4.33333	White Random
637	3	3.33333	White Random
389	4.66667	4.66667	White Matched
849	4	4.66667	Black
628	3	3.66667	White Random
335	5	4	Black
242	2	3	White Random
518	5.66667	5.66667	White Matched
415	2	2.33333	Black
370	5	4.33333	White Matched
904	2.66667	3.66667	Black
622	6.66667	3.66667	Black
1157	1.66667	2	White Matched
390	4.66667	4	White Matched
687	6	5.33333	Black
994	6.66667	4.33333	Black
175	2.33333	2.33333	White Random
1178	5	5.66667	Black
891	4	4.33333	Black
906	5	6	Black
182	4.33333	4	White Random
1022	2.66667	4	White Random
589	3	3.33333	White Matched
724	4	4.33333	White Random
283	3	3	White Matched
1189	3.33333	3.33333	White Matched
862	3.33333	2.66667	White Matched
482	5.66667	4.66667	White Matched
588	4	3.66667	White Random
803	5	3.33333	White Matched
561	4.66667	4.33333	Black
240	3.33333	4.33333	Black
817	3.66667	2.66667	Black
799	3.66667	4	White Random
155	4.33333	5.66667	White Matched
1145	2.33333	3	White Random
798	6	3.33333	White Matched
907	5.33333	5.33333	Black
666	4.33333	3	White Random
811	5	4.66667	White Random
739	3	3.66667	White Matched
620	3	2	Black
933	2.33333	3	White Random
863	3.33333	2.66667	White Random
570	2.33333	2.66667	White Random
768	3.33333	3.66667	White Random
1172	3.33333	4.33333	White Random
740	5	4.66667	White Matched
810	4	5	Black
971	4.66667	4.66667	Black
164	4.33333	3.33333	White Matched
910	1.66667	3	Black
789	4.66667	4	White Random
1143	5.33333	4	Black
1079	3	3	White Matched
525	5.33333	3.66667	Black
506	4.66667	3.66667	White Matched
487	4	4.66667	White Matched
573	3	3	White Matched
466	5	4.33333	White Matched
340	4	4.66667	White Matched
779	3.33333	2.33333	White Random
1152	3.66667	3.33333	Black
894	4	2.66667	White Random
237	4	5.33333	Black
992	3.33333	4.66667	Black
443	1.66667	2.33333	White Matched
990	4.66667	4.66667	White Random
802	4.66667	2.66667	Black
268	4	2.33333	Black
235	4	4	White Matched
766	5.66667	4.66667	White Random
684	5	4.66667	Black
307	4.5	4.33333	Black
460	3.66667	3.66667	White Matched
1042	5	5.66667	Black
239	3	3	Black
194	6	5	Black
773	2.66667	3.66667	White Matched
200	4.66667	4.66667	White Random
838	3	4.33333	White Random
1080	4.33333	3	White Random
952	4.33333	5	White Random
1186	5.33333	3.66667	Black
1013	3.66667	4.66667	Black
368	3.66667	2.66667	White Matched
635	2.66667	5	White Random
930	3.66667	5	White Matched
1018	3.33333	5.66667	White Random
447	3.66667	6.33333	Black
1167	4	4.33333	White Matched
1122	3.66667	3	Black
1019	4.33333	6	Black
272	6.66667	6.33333	Black
1023	4	4	Black
991	2.33333	4.33333	White Random
369	4.66667	4	Black
275	3.66667	3.66667	Black
291	3.66667	4	White Matched
478	3.66667	3.33333	White Matched
733	4.33333	5	White Random
924	5.33333	5.66667	Black
762	4.66667	4.33333	White Matched
1116	4.33333	6.33333	White Random
1173	3	2	White Matched
313	4	5	White Random
499	3.33333	4.33333	White Matched
355	2.33333	4.66667	White Matched
648	4	2.33333	White Random
578	4	5	White Matched
562	6.66667	4.66667	White Matched
638	2	3.33333	Black
492	6	5.33333	Black
416	4.33333	5	Black
871	2.66667	3.33333	White Matched
476	3.5	5	White Matched
603	2.33333	3.66667	Black
972	5	3.33333	White Random
672	4	4.66667	White Matched
468	4.66667	5.66667	White Random
617	3	3	Black
439	2.66667	3.66667	White Matched
523	4	2.33333	White Matched
1050	6.33333	7	White Matched
653	3.66667	5.33333	White Matched
163	3.33333	3.66667	White Matched
1009	4.33333	5	Black
358	3.66667	3.66667	White Random
790	3	2	White Matched
471	5	4	White Matched
750	4.33333	4.33333	White Random
299	3.66667	4	White Matched
427	2.33333	4.33333	Black
1017	3.33333	5	Black
1185	3.33333	4	White Matched
878	3	4	White Matched
597	2	2.66667	White Random
196	1.33333	1.66667	White Matched
257	3	3	White Random
254	3.33333	3.66667	Black
469	3	2.66667	White Matched
704	4.66667	4.66667	White Random
393	3	2.66667	White Random
958	3.33333	3	White Matched
963	3.66667	2	Black
177	1.66667	2.66667	White Random
618	3.66667	4	White Random
256	3	3.66667	Black
351	4.66667	5.66667	White Random
1094	2.66667	3	White Matched
823	2.66667	3.33333	White Random
676	5	4.33333	Black
362	2	3.33333	White Random
785	3	4.66667	Black
702	3.66667	3.66667	White Matched
1120	4.66667	5	Black
885	5	3.66667	White Matched
669	2.66667	4.66667	White Matched
686	2.66667	3.66667	White Random
322	3.33333	4.66667	White Matched
189	3.66667	3	White Random
1103	3.33333	5.33333	White Random
397	2.33333	2.66667	White Matched
777	1.66667	5	Black
445	2.33333	5	Black
366	3	3.66667	White Random
1089	2	3.33333	Black
1090	4.33333	3.66667	White Random
310	5	4.66667	White Matched
264	1	3.66667	White Random
679	3.33333	5.33333	White Random
809	2.66667	3.33333	White Random
1076	4.33333	2.66667	White Random
315	4	4.66667	White Random
691	3.33333	5	White Matched
276	2.33333	5.33333	Black
347	2.33333	2.33333	White Matched
409	3	3.33333	White Random
284	5	6	White Matched
663	3.66667	3.66667	White Matched
1184	5.66667	3.33333	Black
786	5.66667	4	Black
903	4	3.33333	Black
378	3.33333	5.66667	White Random
818	3.66667	4.66667	White Random
1159	3	3	White Matched
1100	6.66667	6	White Matched
218	4.33333	3.66667	Black
1095	5.66667	4.33333	White Random
432	5	3.66667	Black
212	5	3.66667	White Matched
587	2.33333	3.66667	White Matched
581	2.66667	2.33333	White Matched
671	3.33333	6	Black
1175	2.33333	3.33333	White Random
181	5.33333	5.33333	White Random
563	4.33333	3.33333	White Random
715	6.33333	5	Black
1091	4.33333	2	White Random
870	3	4.33333	White Random
280	5.33333	4.66667	White Random
609	4.66667	5.33333	White Matched
941	6.66667	4.66667	Black
727	4.33333	5	White Random
308	4.66667	4	Black
396	2	4	White Random
1073	4.66667	5.66667	White Random
649	3	4.66667	Black
836	4.33333	4.66667	White Random
297	2	3.33333	White Random
848	3	1.33333	Black
454	2	3.33333	White Random
1040	4	4	Black
1052	2.66667	3.66667	White Random
1112	3	3.66667	White Random
989	2.33333	3.33333	White Matched
1177	3.66667	4.66667	White Random
674	2.66667	3.66667	White Matched
514	5	4.33333	White Random
1166	2.66667	3.33333	Black
222	3.66667	6	White Random
983	5.66667	3.66667	White Matched
359	3	4.33333	White Matched
350	3.66667	4	White Matched
557	4.66667	5	Black
170	4.33333	3	Black
970	4.33333	4	White Matched
1058	3	3.33333	Black
211	5.66667	5	White Matched
337	7.66667	5.33333	White Matched
781	3	4	White Matched
1054	4.5	5.5	Black
1151	3.66667	4.33333	Black
345	3.33333	4.33333	White Matched
418	3.33333	4.33333	White Matched
1121	3.33333	3.33333	Black
1113	3	4	White Random
1086	5.5	3.66667	White Random
853	3.33333	2.66667	White Random
154	4.33333	5.33333	Black
1074	3.66667	5	White Matched
384	3.33333	3	White Matched
464	5	5.33333	Black
794	5.66667	4.66667	Black
473	5.66667	3.33333	Black
535	3	6	Black
403	2	2.66667	White Matched
1144	2.33333	3.33333	White Matched
1035	3.33333	2.66667	Black
1129	3.66667	3	White Random
806	2	2	White Matched
1150	4.66667	4	Black
318	5.66667	4.66667	White Random
253	7.33333	5	Black
490	6.33333	5.66667	Black
1183	4.33333	2.33333	Black
935	2.66667	4.33333	White Matched
981	4.33333	4	White Matched
586	3.33333	4	White Random
792	2.33333	5.33333	White Random
968	4.66667	2	White Matched
937	4	4.66667	White Matched
721	4.33333	4.33333	White Random
913	5	3.66667	White Matched
183	3	5.66667	Black
491	5.33333	7.66667	White Matched
147	5.33333	5	Black
900	1.33333	1.66667	Black
743	4	5	White Matched
286	4	4	Black
652	3.33333	4	White Matched
551	4	4.66667	White Random
726	5.33333	5.33333	White Random
401	2.66667	3.66667	White Random
1025	2.66667	3	White Matched
1088	5	6.33333	White Random
1161	5.33333	5	Black
507	3.66667	3.66667	White Matched
1197	4	5	White Matched
960	3	3.66667	White Matched
444	6.66667	4.66667	White Matched
725	4.33333	4	White Matched
204	5.33333	5.66667	White Random
1068	3.33333	4	White Random
681	2.66667	4	White Random
180	5	4	White Random
524	4	5.33333	White Matched
342	3.33333	4	Black
269	4.66667	4.33333	White Random
569	2.33333	2	Black
1107	5.66667	4.66667	Black
537	5.33333	3.66667	Black
484	5	4	Black
897	4	3.66667	Black
854	2.33333	1.66667	Black
1123	3.66667	4.33333	White Matched
575	4.33333	3.66667	White Matched
955	5.33333	5	Black
184	3	3	White Matched
613	3.33333	4.33333	White Random
172	6.66667	5	White Random
232	3	3.33333	Black
630	3.66667	4.66667	Black
564	3.33333	3.33333	White Matched
1004	5	3.33333	White Matched
962	2.33333	3	White Random
1044	5	5.33333	White Matched
892	2	2	Black
608	2.33333	4	White Matched
1142	3.33333	4.66667	Black
735	5	3.66667	White Random
796	2	3	White Random
1119	2.33333	4	Black
394	7.33333	7	Black
1124	4	2.66667	White Random
481	4.33333	4.66667	White Random
642	4.66667	3	White Random
202	3	3.33333	White Random
966	4	4	Black
921	4	4.33333	Black
668	3.66667	4	White Random
685	5.33333	2.66667	White Matched
209	2.66667	4.33333	White Matched
150	4.33333	4	White Random
828	4	3.33333	White Matched
545	4.33333	5	Black
527	6	3.33333	White Matched
826	5	4	Black
757	4.33333	3.33333	White Random
234	6	5.66667	White Matched
846	2.33333	3.33333	White Matched
406	4	5	Black
816	3.33333	3	White Random
1006	4.33333	3.66667	White Matched
1085	6	3.33333	White Random
185	2	4	White Random
565	4	4.33333	White Random
230	6	4.66667	White Random
414	3.33333	4	White Random
1131	4.33333	5	Black
246	5.33333	5.33333	White Matched
319	2.66667	3.66667	White Random
217	3.33333	4	White Random
1098	4.33333	3	White Matched
192	3.33333	4.66667	White Random
705	3	3	White Matched
1118	3	4	Black
461	3	4	White Matched
522	5.33333	4.33333	Black
493	4.33333	5.66667	Black
1027	4	6.33333	Black
405	2.66667	2.33333	Black
336	3.33333	3.66667	Black
219	3.66667	4.66667	White Matched
866	5.33333	3.33333	Black
1109	3	3.66667	White Random
571	4.33333	4	White Random
881	3.33333	5.66667	White Matched
530	4.66667	4.66667	Black
898	2.66667	2.66667	White Matched
927	3.33333	3.33333	White Random
709	2	5	White Random
252	1.33333	3	Black
751	3.66667	3	White Random
198	4.66667	4.66667	White Matched
186	5	5	White Matched
300	5.66667	7	White Matched
626	2.66667	4.33333	White Matched
886	3	2.66667	White Matched
423	4.66667	2.66667	White Matched
801	2.66667	2.33333	White Random
859	4.5	3.66667	Black
744	2	2.33333	Black
582	3.33333	3.66667	White Random
928	5	4	Black
650	4	3.66667	White Random
555	4.33333	3.66667	White Matched
1170	5.66667	2.33333	White Random
167	3.66667	4.33333	White Random
1071	4.33333	6	White Random
385	2.33333	2.33333	Black
1082	3.33333	3.33333	White Random
488	4	3	White Matched
719	4.33333	5	White Random
643	3.66667	5	White Random
825	4.66667	3.33333	White Matched
951	3.66667	3.66667	White Random
852	4.33333	3.66667	Black
521	4.33333	3	Black
1028	3	4.33333	White Matched
419	4	3.66667	White Random
160	4.33333	3.33333	White Random
795	2.66667	3.33333	White Random
640	3.66667	6	White Matched
224	3	4	White Random
1093	2	4.33333	Black
1002	5.66667	5	White Matched
266	6	4.66667	Black
289	6.33333	4.33333	Black
644	3	5.66667	Black
383	5	3.33333	White Matched
201	6.33333	5.66667	Black
542	3.66667	6	White Matched
1148	4.33333	4.66667	White Random
247	6	6.66667	White Matched
420	4.33333	4.33333	Black
784	3.66667	3.33333	Black
688	4.66667	5	White Random
388	5.33333	3.66667	Black
856	4.66667	5.33333	White Random
1137	4.33333	3.66667	White Matched
1147	4	4.33333	White Random
986	4.66667	5.66667	Black
1031	4.33333	4	Black
442	4	3.66667	Black
338	3.33333	5	White Random
277	4.33333	3	White Matched
782	6.66667	6.33333	Black
769	4.33333	4.66667	White Matched
634	3.33333	4.33333	Black
1126	2.66667	3	Black
292	5.66667	4.33333	Black
746	4.5	3.33333	White Matched
646	4	3.66667	White Random
665	3.66667	4.33333	White Random
281	6.66667	7.66667	White Random
876	3	3	White Matched
1176	4	4.66667	White Matched
1092	2	2.33333	White Random
1146	2.33333	3	White Matched
890	3.33333	4.66667	Black
1190	5.66667	4.66667	White Random
1037	5	5	White Matched
867	3	3	White Matched
711	3.66667	1.66667	Black
610	2.66667	4.33333	White Matched
754	4.66667	4.66667	White Random
865	3.66667	4.33333	Black
207	3.33333	3	White Matched
360	1.33333	3	White Random
187	3	2.33333	White Matched
776	3.66667	5.66667	Black
647	4.33333	4	Black
459	4	4.33333	White Matched
221	4.33333	5	White Matched
1077	5.33333	3.33333	Black
680	4.33333	3.66667	Black
946	4	5.66667	White Matched
1008	5.33333	5.33333	Black
539	5	6.5	White Random
330	5.33333	3.66667	Black
293	5	6	White Random
1191	3.33333	4	White Matched
619	4	4.66667	White Matched
778	4	4	White Random
625	3.66667	6	White Matched
1083	3.33333	2.66667	Black
327	5	3.33333	Black
592	5.33333	5.66667	White Matched
249	7	6	White Random
706	4.33333	3	Black
558	5.33333	5.33333	White Random
949	4.33333	4.33333	White Random
934	3.33333	1.66667	Black
1003	4	4.33333	Black
824	3.33333	3	White Random
936	4.66667	4	White Random
435	4.33333	3	Black
303	6	4	Black
1087	5	3.33333	White Random
1011	5	3.66667	Black
485	4.66667	4	White Random
509	4	3.33333	White Matched
550	3	2.66667	White Matched
323	3.33333	3.33333	White Random
477	5	4.66667	White Random
1024	4.33333	5.66667	White Matched
1181	3	6	Black
243	6	4.33333	Black
1133	4.66667	3	White Random
364	3	3.66667	White Random
191	3.33333	3	White Matched
875	3.33333	4.33333	Black
984	5	3.33333	Black
1043	3	2.66667	White Matched
531	2.33333	4	Black
324	3.66667	2.33333	White Matched
568	4.66667	3.33333	White Matched
1140	5	3.33333	White Random
950	4	4.33333	White Matched
223	2	2.33333	White Random
320	5	4.66667	Black
149	3.66667	3.66667	Black
797	3.33333	5.66667	White Random
273	3.33333	4	White Random
248	5.66667	3.33333	Black
365	2.66667	2.66667	White Random
1198	3.66667	4.66667	White Matched
641	3.66667	3.66667	Black
1155	2	2.33333	White Random
1149	2.66667	3	White Random
197	4	2.66667	White Matched
1030	3	2.66667	White Matched
829	2.33333	3.33333	White Matched
909	2.33333	3	Black
495	3.66667	4	White Matched
295	4	5.66667	Black
334	5	4	White Random
1005	4.66667	5.33333	White Random
998	5	3.33333	Black
1047	4.66667	4.33333	Black
498	3.66667	4.33333	White Random
1128	3	6.33333	White Matched
505	3.66667	4	White Matched
651	5.33333	3.66667	White Random
604	4	4.33333	White Random
615	4.33333	2.66667	Black
407	3.66667	6.33333	Black
964	5.33333	6	White Random
410	6	3.33333	Black
737	5.33333	5.66667	White Matched
220	4.66667	3.66667	White Matched
382	5.33333	4.33333	White Random
1057	3.33333	3.33333	Black
844	2.33333	3.66667	White Matched
381	2	2	White Matched
1192	3	5	White Matched
145	4.66667	5	White Random
748	3	5	White Matched
169	5	3.33333	White Matched
437	4.33333	2.33333	White Matched
973	3.66667	5.33333	White Matched
654	4.66667	4.33333	White Matched
1115	4.66667	4	Black
580	4	3.66667	Black
636	3.33333	4	Black
470	5	4.33333	Black
282	6	5.66667	White Random
847	3.33333	2.33333	White Matched
456	4.33333	3	White Matched
215	3.66667	5	White Random
673	2.66667	3.66667	White Random
1106	3.66667	4.33333	Black
455	4	3.33333	White Matched
258	3	2.33333	Black
151	3.33333	4.66667	Black
474	4.33333	4	Black
667	5	6.33333	White Random
21	4	3.66667	White Matched
71	3.33333	4	White Matched
101	3.33333	4	White Matched
552	5	3.33333	White Matched
116	3	3	Black
15	5	3	Black
73	4	2.66667	Black
39	5.66667	5.66667	White Random
99	3	2.66667	White Matched
108	3.66667	3.66667	White Random
44	4.5	3.66667	White Random
69	5	4.66667	Black
110	2	4	White Random
16	4.66667	3.66667	Black
109	2.66667	3	Black
79	4.33333	4.33333	White Matched
89	3	3	Black
43	3	3	White Random
95	2.66667	2	White Matched
82	4.33333	5	White Matched
14	2.33333	5	White Matched
100	2.33333	3.33333	White Random
48	3.66667	4.33333	White Random
94	2	3.33333	White Random
30	2	3.33333	White Random
83	2	2.33333	White Matched
49	5	3.66667	White Random
32	4.66667	4.66667	White Random
93	2.66667	2.66667	White Random
56	6	6	Black
38	5	3	White Matched
135	2.33333	4	White Matched
66	4.33333	3.66667	White Random
27	3	3	White Random
77	4.66667	4	Black
98	2.66667	2.66667	White Random
60	4.66667	5	Black
18	4.66667	3	White Matched
90	1.33333	2	White Random
19	3.33333	2.66667	White Matched
124	5	4.66667	White Matched
25	2.66667	2.66667	White Matched
10	5	5.33333	White Matched
92	2	3.33333	White Matched
1	2.33333	4.66667	White Matched
111	6	6	White Random
106	2.33333	3.66667	Black
68	5	5.33333	White Matched
115	3.33333	3.66667	White Random
36	4	4	White Matched
120	2.66667	4.66667	White Matched
65	5	6.33333	White Random
75	5	4.33333	White Matched
26	2.66667	4	White Matched
117	4	4.33333	White Matched
137	4	3	Black
34	4	4.33333	White Random
28	4	4.66667	Black
142	3.66667	3	White Matched
105	2.33333	3.5	White Matched
96	2.33333	3.33333	Black
37	4	5	White Random
113	1.66667	5.33333	White Random
119	4.33333	2.66667	White Random
59	6.33333	5	White Random
87	3	5	White Matched
70	6.33333	7.33333	Black
58	4	4	White Matched
33	5.66667	4.66667	Black
47	3.33333	5	White Random
97	4.66667	3	Black
121	4.66667	4.33333	Black
84	2	3.66667	Black
13	3	3.66667	Black
76	5.33333	5.33333	White Matched
118	3.66667	5.33333	Black
67	4	3.33333	Black
40	4.66667	4.66667	White Random
20	6.33333	4	White Matched
52	4.33333	4	Black
24	2.66667	4	Black
81	4.33333	4.66667	White Random
11	5	3	White Matched
45	4.66667	3.33333	White Matched
134	2.33333	3	White Random
85	2.66667	3.66667	White Random
61	5.66667	4.33333	White Random
103	2	3.66667	White Matched
114	4.66667	4.33333	White Random
112	4.5	3.33333	Black
102	4.33333	4.66667	Black
22	3	4.33333	White Matched
31	5	4.66667	Black
86	1.33333	2.66667	White Random
91	5	3	White Random
138	2.66667	5.66667	White Matched
80	4.33333	4.66667	White Random
51	6	3	White Matched
8	4.33333	2	White Matched
64	3.33333	3.33333	White Matched
133	4	3.33333	White Matched
46	4	3	Black
74	4.66667	5.33333	White Matched
72	5	3.33333	Black
29	2.66667	3.66667	White Matched
12	4	3.66667	White Matched
23	4.33333	2.33333	White Random
62	5.66667	4.66667	Black
41	2	4.66667	Black
78	3	3.66667	White Random
131	5.33333	5.33333	White Matched
139	2.66667	3	White Matched
4	8.66667	8.33333	Black
42	3	3.66667	White Matched
55	3	4.33333	White Matched
35	4	3.66667	White Matched
54	4.33333	5.33333	White Random
143	6.66667	5.66667	White Matched
17	6.66667	5.66667	White Random
53	4.33333	2.66667	White Random
57	3.33333	3.33333	White Matched
63	4.66667	5	Black
144	5.66667	6.33333	Black
302	2.66667	2.66667	White Matched
208	4	3	Black
541	4.33333	4.33333	Black
231	5.33333	5	Black
241	4.66667	3.66667	White Matched
395	3.33333	3.33333	White Random
559	4	4.66667	White Random
250	2	3.33333	White Random
408	4.33333	4.66667	Black
577	4	3.33333	White Random
285	4	4.66667	Black
446	4.66667	5	White Matched
879	3.66667	3.33333	Black
489	3.33333	3.66667	White Matched
190	3	3.33333	White Random
546	6	4	White Matched
692	4.33333	4.33333	Black
699	6	6	White Random
228	4.66667	3.33333	Black
386	3.66667	6.33333	Black
261	3.66667	3	Black
738	3.66667	3.66667	Black
745	4.66667	4	White Matched
752	3.33333	2.33333	White Random
753	4.33333	4.66667	White Matched
975	4	3.33333	White Random
993	3	2.33333	White Random
882	3.33333	4.33333	White Matched
893	4.66667	5.33333	Black
122	3.33333	3	Black
136	3.33333	4.66667	Black
429	7	5	Black
947	5	4.33333	Black
128	4	2.66667	White Random
129	2.66667	4.33333	White Matched
629	2.66667	2.33333	White Matched
328	4.33333	5	White Matched
736	4.33333	4.33333	White Matched
1072	3.33333	5	White Random
174	3.66667	4.66667	White Random
516	3	3.66667	Black
1084	6.66667	6.66667	White Matched
771	6.66667	6.33333	White Matched
656	5.33333	3	White Random
529	6.33333	4.66667	White Matched
421	3.66667	3	Black
425	4.33333	5	Black
919	7.66667	8.33333	Black
923	9	8.66667	Black
107	5.66667	4.33333	Black
104	3.33333	4	Black
125	5.33333	5.33333	Black
126	5.33333	5	Black
140	4.66667	5	White Random
2	4.66667	4.33333	Black
5	7	6.5	Black
7	4	4	Black
9	2	2.33333	Black
50	3	3	Black
88	3.33333	4	Black
123	3.66667	3	Black
3	3.66667	3.33333	Black
6	3	4.33333	Black
1165	4.66667	6.33333	White Random
731	4	2.66667	White Random
631	3.66667	3.33333	White Random
880	1.66667	3.66667	Black
1195	3.66667	4.66667	Black
939	3.66667	5.66667	Black
940	3.33333	4.66667	Black
1097	7	4.33333	White Random
1102	4.66667	4.66667	White Matched
1162	2.66667	3.66667	Black
1163	2.33333	3	White Matched
1038	3.66667	2.33333	White Random
426	4	5	White Random
483	3.66667	5.33333	White Random
132	2.33333	3.33333	White Random

## Sheet: T7 secondary analysis model ind
PRD_APPL_ID_ANON3	CONDITION	OVERALL_IMPACT	anonymiz.centered	race.centered	appl.type.centered	A1orNot.centered	behav.irg.appl.centered	gender.centered	esi.centered	instit.bin5.centered	believes.black.centered	believes.female.centered	believes.esi.centered	believes.low.impact.instit.centered	grant4.centered	grant5.centered
744	STAN	7	0.5	0.498216	-0.117943	0.690661	-0.310388	0.360753	-0.185729	-0.178594	0	-0.166667	-0.333333	0	-0.166667	-0.333333
744	STAN	5	0.5	0.498216	-0.117943	0.690661	-0.310388	0.360753	-0.185729	-0.178594	0	-0.166667	0.666667	0	0.833333	0.666667
744	STAN	5	0.5	0.498216	-0.117943	0.690661	-0.310388	0.360753	-0.185729	-0.178594	0	-0.166667	-0.333333	0	-0.166667	0.666667
331	STAN	3	0.5	-0.501784	-0.117943	-0.309339	-0.310388	-0.639247	-0.185729	-0.178594	0	0.4	0	0	0.8	0.833333
331	STAN	5	0.5	-0.501784	-0.117943	-0.309339	-0.310388	-0.639247	-0.185729	-0.178594	0	0.4	0	0	-0.2	-0.166667
331	STAN	1	0.5	-0.501784	-0.117943	-0.309339	-0.310388	-0.639247	-0.185729	-0.178594	0	0.4	0	0	0.8	0.833333
541	STAN	2	0.5	0.498216	0.882057	0.690661	-0.310388	0.360753	-0.185729	-0.178594	0	0	0	0	0.666667	0.8
541	STAN	2	0.5	0.498216	0.882057	0.690661	-0.310388	0.360753	-0.185729	-0.178594	0	0	0	0	-0.333333	NA
541	STAN	2	0.5	0.498216	0.882057	0.690661	-0.310388	0.360753	-0.185729	-0.178594	0	0	0	0	-0.333333	-0.2
107	STAN	2	0.5	0.498216	-0.117943	-0.309339	0.689612	-0.639247	0.814271	-0.178594	0	0.166667	0.666667	0	1.16667	1.33333
107	STAN	2	0.5	0.498216	-0.117943	-0.309339	0.689612	-0.639247	0.814271	-0.178594	0	0.166667	-0.333333	0	0.166667	0.333333
107	STAN	3	0.5	0.498216	-0.117943	-0.309339	0.689612	-0.639247	0.814271	-0.178594	0	0.166667	0.666667	0	0.166667	0.333333
651	STAN	2	0.5	0.498216	-0.117943	-0.309339	-0.310388	0.360753	-0.185729	-0.178594	0	0	-0.166667	0	0.166667	0.666667
651	STAN	5	0.5	0.498216	-0.117943	-0.309339	-0.310388	0.360753	-0.185729	-0.178594	0	0	-0.166667	0	0.166667	-0.333333
651	STAN	4	0.5	0.498216	-0.117943	-0.309339	-0.310388	0.360753	-0.185729	-0.178594	0	0	-0.166667	0	-0.833333	0.666667
516	STAN	8	0.5	0.498216	-0.117943	-0.309339	-0.310388	0.360753	-0.185729	-0.178594	0	0	-0.166667	0	-1.16667	-0.166667
516	STAN	6	0.5	0.498216	-0.117943	-0.309339	-0.310388	0.360753	-0.185729	-0.178594	0	0	-0.166667	0	-1.16667	-0.166667
516	STAN	5	0.5	0.498216	-0.117943	-0.309339	-0.310388	0.360753	-0.185729	-0.178594	0	0	0.833333	0	0.833333	-0.166667
648	STAN	2	0.5	-0.501784	-0.117943	-0.309339	-0.310388	0.360753	0.814271	-0.178594	0.333333	-0.166667	0.166667	0	2	0.833333
648	STAN	2	0.5	-0.501784	-0.117943	-0.309339	-0.310388	0.360753	0.814271	-0.178594	0.333333	-0.166667	0.166667	0	2	-0.166667
648	STAN	4	0.5	-0.501784	-0.117943	-0.309339	-0.310388	0.360753	0.814271	-0.178594	0.333333	-0.166667	0.166667	0	-1	-0.166667
593	STAN	5	0.5	0.498216	-0.117943	0.690661	0.689612	-0.639247	0.814271	-0.178594	-0.166667	0.333333	-0.5	0	0.166667	0.166667
593	STAN	3	0.5	0.498216	-0.117943	0.690661	0.689612	-0.639247	0.814271	-0.178594	-0.166667	0.333333	0.5	0	0.166667	0.166667
593	STAN	2	0.5	0.498216	-0.117943	0.690661	0.689612	-0.639247	0.814271	-0.178594	-0.166667	0.333333	0.5	0	1.16667	0.166667
499	STAN	2	0.5	0.498216	-0.117943	-0.309339	-0.310388	0.360753	-0.185729	-0.178594	NA	NA	NA	NA	1.33333	2
499	STAN	6	0.5	0.498216	-0.117943	-0.309339	-0.310388	0.360753	-0.185729	-0.178594	0	-0.2	-0.4	0	-1.66667	-1
499	STAN	3	0.5	0.498216	-0.117943	-0.309339	-0.310388	0.360753	-0.185729	-0.178594	0	-0.2	-0.4	0	0.333333	0
435	STAN	7	0.5	0.498216	-0.117943	-0.309339	-0.310388	0.360753	-0.185729	0.821406	0	0	0	0	-1.83333	-2.5
435	STAN	4	0.5	0.498216	-0.117943	-0.309339	-0.310388	0.360753	-0.185729	0.821406	0	0	0	0	1.16667	0.5
435	STAN	8	0.5	0.498216	-0.117943	-0.309339	-0.310388	0.360753	-0.185729	0.821406	0	0	0	0	-0.833333	1.5
234	STAN	1	0.5	0.498216	0.882057	-0.309339	-0.310388	0.360753	-0.185729	-0.178594	0	0	0	0	0.5	0.666667
234	STAN	2	0.5	0.498216	0.882057	-0.309339	-0.310388	0.360753	-0.185729	-0.178594	0	0	0	0	0.5	0.666667
234	STAN	3	0.5	0.498216	0.882057	-0.309339	-0.310388	0.360753	-0.185729	-0.178594	0	0	0	0	-0.5	-0.333333
714	STAN	3	0.5	0.498216	-0.117943	-0.309339	-0.310388	-0.639247	0.814271	-0.178594	0	-0.5	0.833333	0	0.2	0
714	STAN	2	0.5	0.498216	-0.117943	-0.309339	-0.310388	-0.639247	0.814271	-0.178594	0	0.5	-0.166667	0	1.2	1
714	STAN	7	0.5	0.498216	-0.117943	-0.309339	-0.310388	-0.639247	0.814271	-0.178594	0	0.5	-0.166667	0	-1.8	-2
108	STAN	4	0.5	0.498216	-0.117943	-0.309339	-0.310388	0.360753	-0.185729	-0.178594	0	0	-0.166667	0	0.333333	0
108	STAN	2	0.5	0.498216	-0.117943	-0.309339	-0.310388	0.360753	-0.185729	-0.178594	0	0	-0.166667	0	0.333333	0
108	STAN	3	0.5	0.498216	-0.117943	-0.309339	-0.310388	0.360753	-0.185729	-0.178594	0	0	-0.166667	0	0.333333	0
567	STAN	2	0.5	-0.501784	0.882057	-0.309339	-0.310388	-0.639247	-0.185729	-0.178594	0.833333	0	0	0	-0.166667	-0.2
567	STAN	3	0.5	-0.501784	0.882057	-0.309339	-0.310388	-0.639247	-0.185729	-0.178594	-0.166667	0	0	0	0.833333	-0.2
567	STAN	2	0.5	-0.501784	0.882057	-0.309339	-0.310388	-0.639247	-0.185729	-0.178594	-0.166667	0	0	0	-0.166667	0.8
521	STAN	4	0.5	-0.501784	-0.117943	-0.309339	0.689612	0.360753	-0.185729	0.821406	-0.333333	-0.333333	0	0	0.166667	-0.333333
521	STAN	2	0.5	-0.501784	-0.117943	-0.309339	0.689612	0.360753	-0.185729	0.821406	0.666667	-0.333333	0	0	0.166667	-0.333333
521	STAN	1	0.5	-0.501784	-0.117943	-0.309339	0.689612	0.360753	-0.185729	0.821406	0.666667	-0.333333	0	0	1.16667	0.666667
446	STAN	4	0.5	0.498216	-0.117943	-0.309339	0.689612	-0.639247	0.814271	-0.178594	0.2	0.4	0.166667	0	0.166667	1.33333
446	STAN	6	0.5	0.498216	-0.117943	-0.309339	0.689612	-0.639247	0.814271	-0.178594	-0.8	0.4	0.166667	0	0.166667	-0.666667
446	STAN	4	0.5	0.498216	-0.117943	-0.309339	0.689612	-0.639247	0.814271	-0.178594	0.2	0.4	0.166667	0	0.166667	0.333333
376	STAN	5	0.5	0.498216	0.882057	-0.309339	-0.310388	0.360753	-0.185729	-0.178594	0	0	0	0	-0.166667	0.4
376	STAN	5	0.5	0.498216	0.882057	-0.309339	-0.310388	0.360753	-0.185729	-0.178594	0	0	0	0	-1.16667	-1.6
376	STAN	2	0.5	0.498216	0.882057	-0.309339	-0.310388	0.360753	-0.185729	-0.178594	0	0	0	0	0.833333	0.4
281	STAN	4	0.5	0.498216	-0.117943	0.690661	-0.310388	0.360753	-0.185729	-0.178594	0	0	0.666667	0	-1.16667	-1.33333
281	STAN	4	0.5	0.498216	-0.117943	0.690661	-0.310388	0.360753	-0.185729	-0.178594	0	0	-0.333333	0	-1.16667	-0.333333
281	STAN	6	0.5	0.498216	-0.117943	0.690661	-0.310388	0.360753	-0.185729	-0.178594	0	0	0.666667	0	0.833333	0.666667
254	STAN	2	0.5	-0.501784	0.882057	0.690661	-0.310388	0.360753	-0.185729	-0.178594	-0.166667	0	-0.166667	0	0.5	0.5
254	STAN	2	0.5	-0.501784	0.882057	0.690661	-0.310388	0.360753	-0.185729	-0.178594	0.833333	0	-0.166667	0	-0.5	-0.5
254	STAN	5	0.5	-0.501784	0.882057	0.690661	-0.310388	0.360753	-0.185729	-0.178594	-0.166667	0	0.833333	0	-0.5	-0.5
596	STAN	9	0.5	-0.501784	-0.117943	-0.309339	-0.310388	0.360753	-0.185729	-0.178594	-0.333333	-0.166667	0	-0.166667	-1.66667	-1.83333
596	STAN	5	0.5	-0.501784	-0.117943	-0.309339	-0.310388	0.360753	-0.185729	-0.178594	-0.333333	0.833333	0	-0.166667	0.333333	0.166667
596	STAN	6	0.5	-0.501784	-0.117943	-0.309339	-0.310388	0.360753	-0.185729	-0.178594	0.666667	-0.166667	0	-0.166667	0.333333	0.166667
296	STAN	5	0.5	0.498216	-0.117943	0.690661	0.689612	NA	-0.185729	-0.178594	0	0	0	0	0.166667	0.166667
296	STAN	1	0.5	0.498216	-0.117943	0.690661	0.689612	NA	-0.185729	-0.178594	0	0	0	0	0.166667	1.16667
296	STAN	4	0.5	0.498216	-0.117943	0.690661	0.689612	NA	-0.185729	-0.178594	0	0	0	0	0.166667	0.166667
290	STAN	4	0.5	-0.501784	-0.117943	-0.309339	0.689612	-0.639247	0.814271	-0.178594	-0.166667	0.5	0.666667	0	-0.166667	0.333333
290	STAN	4	0.5	-0.501784	-0.117943	-0.309339	0.689612	-0.639247	0.814271	-0.178594	0.833333	0.5	0.666667	0	-0.166667	-1.66667
290	STAN	3	0.5	-0.501784	-0.117943	-0.309339	0.689612	-0.639247	0.814271	-0.178594	-0.166667	0.5	-0.333333	0	0.833333	1.33333
271	STAN	1	0.5	0.498216	0.882057	0.690661	-0.310388	0.360753	-0.185729	-0.178594	0	-0.166667	0	0	0.833333	0.833333
271	STAN	4	0.5	0.498216	0.882057	0.690661	-0.310388	0.360753	-0.185729	-0.178594	0	-0.166667	0	0	-0.166667	-0.166667
271	STAN	2	0.5	0.498216	0.882057	0.690661	-0.310388	0.360753	-0.185729	-0.178594	0	-0.166667	0	0	-0.166667	-0.166667
602	STAN	2	0.5	-0.501784	-0.117943	-0.309339	0.689612	-0.639247	-0.185729	-0.178594	0.333333	0.166667	-0.4	0	-0.5	-0.333333
602	STAN	1	0.5	-0.501784	-0.117943	-0.309339	0.689612	-0.639247	-0.185729	-0.178594	0.333333	0.166667	NA	0	0.5	-0.333333
602	STAN	1	0.5	-0.501784	-0.117943	-0.309339	0.689612	-0.639247	-0.185729	-0.178594	-0.666667	0.166667	0.6	0	0.5	0.666667
256	STAN	5	0.5	0.498216	0.882057	0.690661	-0.310388	0.360753	-0.185729	-0.178594	0	-0.166667	0.833333	0	-0.333333	0
256	STAN	2	0.5	0.498216	0.882057	0.690661	-0.310388	0.360753	-0.185729	-0.178594	0	-0.166667	-0.166667	0	-0.333333	0
256	STAN	3	0.5	0.498216	0.882057	0.690661	-0.310388	0.360753	-0.185729	-0.178594	0	-0.166667	-0.166667	0	0.666667	1
148	STAN	3	0.5	0.498216	0.882057	0.690661	-0.310388	-0.639247	-0.185729	-0.178594	0	0.166667	0	0	0.666667	-0.333333
148	STAN	6	0.5	0.498216	0.882057	0.690661	-0.310388	-0.639247	-0.185729	-0.178594	0	0.166667	0	0	-0.333333	-0.333333
148	STAN	5	0.5	0.498216	0.882057	0.690661	-0.310388	-0.639247	-0.185729	-0.178594	0	-0.833333	0	0	-0.333333	0.666667
705	STAN	7	0.666667	-0.501784	-0.117943	-0.309339	-0.310388	0.360753	-0.185729	-0.178594	-0.333333	0	NA	0	-1.33333	0
693	STAN	3	0.5	-0.501784	-0.117943	-0.309339	0.689612	-0.639247	-0.185729	-0.178594	0	0	-0.333333	-0.166667	-0.166667	0
693	STAN	2	0.5	-0.501784	-0.117943	-0.309339	0.689612	-0.639247	-0.185729	-0.178594	0	0	-0.333333	-0.166667	0.833333	0
693	STAN	5	0.5	-0.501784	-0.117943	-0.309339	0.689612	-0.639247	-0.185729	-0.178594	0	0	-0.333333	-0.166667	-0.166667	0
665	STAN	3	0.5	-0.501784	-0.117943	-0.309339	0.689612	-0.639247	0.814271	-0.178594	0.166667	-0.5	0.2	-0.166667	1.16667	0.666667
665	STAN	6	0.5	-0.501784	-0.117943	-0.309339	0.689612	-0.639247	0.814271	-0.178594	-0.833333	-0.5	0.2	-0.166667	-1.83333	-2.33333
665	STAN	7	0.5	-0.501784	-0.117943	-0.309339	0.689612	-0.639247	0.814271	-0.178594	0.166667	0.5	0.2	-0.166667	1.16667	0.666667
341	STAN	4	0.5	-0.501784	-0.117943	-0.309339	0.689612	-0.639247	-0.185729	-0.178594	0.333333	0.333333	-0.333333	0	0.166667	-0.2
341	STAN	5	0.5	-0.501784	-0.117943	-0.309339	0.689612	-0.639247	-0.185729	-0.178594	0.333333	0.333333	-0.333333	0	-1.83333	NA
341	STAN	3	0.5	-0.501784	-0.117943	-0.309339	0.689612	-0.639247	-0.185729	-0.178594	0.333333	-0.666667	-0.333333	0	0.166667	-0.2
338	STAN	2	0.5	0.498216	-0.117943	-0.309339	-0.310388	0.360753	-0.185729	-0.178594	0	-0.166667	0	0	1.5	0.666667
338	STAN	4	0.5	0.498216	-0.117943	-0.309339	-0.310388	0.360753	-0.185729	-0.178594	0	-0.166667	0	0	0.5	-0.333333
338	STAN	4	0.5	0.498216	-0.117943	-0.309339	-0.310388	0.360753	-0.185729	-0.178594	0	-0.166667	0	0	0.5	0.666667
682	STAN	6	0.5	-0.501784	-0.117943	-0.309339	0.689612	0.360753	-0.185729	-0.178594	0.333333	-0.166667	0.833333	0.833333	-2.33333	-2.16667
682	STAN	7	0.5	-0.501784	-0.117943	-0.309339	0.689612	0.360753	-0.185729	-0.178594	0.333333	-0.166667	-0.166667	-0.166667	-0.333333	-1.16667
682	STAN	3	0.5	-0.501784	-0.117943	-0.309339	0.689612	0.360753	-0.185729	-0.178594	0.333333	-0.166667	-0.166667	-0.166667	0.666667	0.833333
263	STAN	3	0.6	-0.501784	-0.117943	0.690661	-0.310388	0.360753	-0.185729	-0.178594	0.25	0	-0.4	0	0.5	0.75
263	STAN	6	0.6	-0.501784	-0.117943	0.690661	-0.310388	0.360753	-0.185729	-0.178594	-0.75	0	0.6	0	0.5	0.75
660	STAN	8	0.6	0.498216	-0.117943	-0.309339	-0.310388	0.360753	-0.185729	-0.178594	0	0	-0.4	0	-1.6	-0.4
660	STAN	5	0.6	0.498216	-0.117943	-0.309339	-0.310388	0.360753	-0.185729	-0.178594	0	0	-0.4	0	-1.6	-0.4
358	STAN	6	0.5	-0.501784	-0.117943	-0.309339	-0.310388	0.360753	-0.185729	-0.178594	0.333333	0	0	-0.333333	-0.6	-0.333333
358	STAN	3	0.5	-0.501784	-0.117943	-0.309339	-0.310388	0.360753	-0.185729	-0.178594	0.333333	0	0	-0.333333	NA	1.66667
358	STAN	7	0.5	-0.501784	-0.117943	-0.309339	-0.310388	0.360753	-0.185729	-0.178594	0.333333	0	0	-0.333333	1.4	-0.333333
493	STAN	6	0.6	-0.501784	-0.117943	-0.309339	0.689612	0.360753	-0.185729	-0.178594	0.2	-0.2	0.8	0	1.2	1
493	STAN	4	0.6	-0.501784	-0.117943	-0.309339	0.689612	0.360753	-0.185729	-0.178594	0.2	-0.2	-0.2	0	-1.8	0
486	STAN	2	0.5	0.498216	-0.117943	-0.309339	0.689612	0.360753	-0.185729	-0.178594	0	-0.333333	-0.333333	0	0.166667	0.833333
486	STAN	4	0.5	0.498216	-0.117943	-0.309339	0.689612	0.360753	-0.185729	-0.178594	0	-0.333333	-0.333333	NA	1.16667	0.833333
486	STAN	1	0.5	0.498216	-0.117943	-0.309339	0.689612	0.360753	-0.185729	-0.178594	0	-0.333333	-0.333333	0	1.16667	0.833333
433	STAN	6	0.5	0.498216	-0.117943	-0.309339	-0.310388	0.360753	0.814271	-0.178594	NA	NA	NA	NA	-0.833333	-0.4
433	STAN	5	0.5	0.498216	-0.117943	-0.309339	-0.310388	0.360753	0.814271	-0.178594	0	0	0	0	0.166667	0.6
433	STAN	2	0.5	0.498216	-0.117943	-0.309339	-0.310388	0.360753	0.814271	-0.178594	0	0	0	0	0.166667	0.6
190	STAN	5	0.5	-0.501784	-0.117943	-0.309339	-0.310388	0.360753	-0.185729	-0.178594	-0.166667	0	0.6	0	-0.833333	-0.333333
190	STAN	3	0.5	-0.501784	-0.117943	-0.309339	-0.310388	0.360753	-0.185729	-0.178594	0.833333	0	NA	0	1.16667	0.666667
190	STAN	7	0.5	-0.501784	-0.117943	-0.309339	-0.310388	0.360753	-0.185729	-0.178594	-0.166667	0	-0.4	0	0.166667	-1.33333
116	STAN	2	0.5	-0.501784	-0.117943	-0.309339	-0.310388	-0.639247	0.814271	-0.178594	0.666667	0.5	0.5	0	0.833333	0.666667
116	STAN	2	0.5	-0.501784	-0.117943	-0.309339	-0.310388	-0.639247	0.814271	-0.178594	-0.333333	0.5	0.5	0	0.833333	0.666667
116	STAN	3	0.5	-0.501784	-0.117943	-0.309339	-0.310388	-0.639247	0.814271	-0.178594	0.666667	0.5	0.5	0	-0.166667	-0.333333
289	STAN	5	0.5	-0.501784	-0.117943	-0.309339	-0.310388	0.360753	-0.185729	0.821406	0.333333	0.666667	0.833333	0	0.333333	-0.166667
289	STAN	1	0.5	-0.501784	-0.117943	-0.309339	-0.310388	0.360753	-0.185729	0.821406	0.333333	-0.333333	-0.166667	0	-0.666667	-0.166667
289	STAN	3	0.5	-0.501784	-0.117943	-0.309339	-0.310388	0.360753	-0.185729	0.821406	0.333333	-0.333333	-0.166667	0	0.333333	0.833333
372	STAN	5	0.5	0.498216	-0.117943	0.690661	-0.310388	0.360753	-0.185729	-0.178594	-0.166667	0	0.833333	0	0.166667	0
372	STAN	2	0.5	0.498216	-0.117943	0.690661	-0.310388	0.360753	-0.185729	-0.178594	-0.166667	0	-0.166667	0	1.16667	1
372	STAN	6	0.5	0.498216	-0.117943	0.690661	-0.310388	0.360753	-0.185729	-0.178594	-0.166667	0	-0.166667	0	0.166667	0
494	STAN	4	0.5	0.498216	-0.117943	-0.309339	-0.310388	0.360753	-0.185729	-0.178594	0	0	0	0	-0.333333	-0.333333
494	STAN	3	0.5	0.498216	-0.117943	-0.309339	-0.310388	0.360753	-0.185729	-0.178594	0	0	0	0	-0.333333	-0.333333
494	STAN	4	0.5	0.498216	-0.117943	-0.309339	-0.310388	0.360753	-0.185729	-0.178594	0	0	0	0	0.666667	0.666667
393	STAN	4	0.5	-0.501784	-0.117943	0.690661	-0.310388	-0.639247	-0.185729	-0.178594	0.2	0.166667	0.166667	0	-0.833333	1
393	STAN	5	0.5	-0.501784	-0.117943	0.690661	-0.310388	-0.639247	-0.185729	-0.178594	0.2	0.166667	0.166667	0	1.16667	0
393	STAN	4	0.5	-0.501784	-0.117943	0.690661	-0.310388	-0.639247	-0.185729	-0.178594	0.2	0.166667	0.166667	0	1.16667	1
497	STAN	4	0.5	0.498216	-0.117943	-0.309339	0.689612	0.360753	0.814271	-0.178594	0	0	0.5	0	-0.166667	-0.166667
497	STAN	4	0.5	0.498216	-0.117943	-0.309339	0.689612	0.360753	0.814271	-0.178594	0	0	0.5	0	-0.166667	-0.166667
497	STAN	5	0.5	0.498216	-0.117943	-0.309339	0.689612	0.360753	0.814271	-0.178594	0	0	0.5	0	-0.166667	-0.166667
332	STAN	2	0.5	0.498216	-0.117943	-0.309339	-0.310388	0.360753	-0.185729	-0.178594	0	-0.166667	-0.166667	0	1	-0.333333
332	STAN	4	0.5	0.498216	-0.117943	-0.309339	-0.310388	0.360753	-0.185729	-0.178594	0	-0.166667	-0.166667	0	-1	0.666667
332	STAN	5	0.5	0.498216	-0.117943	-0.309339	-0.310388	0.360753	-0.185729	-0.178594	0	-0.166667	-0.166667	0	0	-0.333333
496	STAN	5	0.5	-0.501784	-0.117943	-0.309339	0.689612	-0.639247	-0.185729	-0.178594	-0.166667	0.333333	0.166667	0	-0.166667	-0.333333
496	STAN	3	0.5	-0.501784	-0.117943	-0.309339	0.689612	-0.639247	-0.185729	-0.178594	-0.166667	0.333333	0.166667	0	-0.166667	0.666667
496	STAN	3	0.5	-0.501784	-0.117943	-0.309339	0.689612	-0.639247	-0.185729	-0.178594	0.833333	0.333333	0.166667	0	-1.16667	-0.333333
589	STAN	4	0.5	-0.501784	-0.117943	0.690661	-0.310388	0.360753	-0.185729	-0.178594	-0.333333	0	0	0	-0.5	-0.166667
589	STAN	2	0.5	-0.501784	-0.117943	0.690661	-0.310388	0.360753	-0.185729	-0.178594	-0.333333	0	0	0	0.5	-0.166667
589	STAN	2	0.5	-0.501784	-0.117943	0.690661	-0.310388	0.360753	-0.185729	-0.178594	0.666667	0	0	0	0.5	-0.166667
799	STAN	4	0.5	-0.501784	-0.117943	0.690661	0.689612	0.360753	-0.185729	-0.178594	0.166667	0	0	0	1	0.666667
799	STAN	3	0.5	-0.501784	-0.117943	0.690661	0.689612	0.360753	-0.185729	-0.178594	0.166667	0	0	0	2	1.66667
799	STAN	4	0.5	-0.501784	-0.117943	0.690661	0.689612	0.360753	-0.185729	-0.178594	0.166667	0	0	0	-1	0.666667
93	STAN	2	0.5	0.498216	-0.117943	-0.309339	-0.310388	0.360753	-0.185729	0.821406	0	-0.166667	-0.166667	0	0.833333	0.333333
93	STAN	1	0.5	0.498216	-0.117943	-0.309339	-0.310388	0.360753	-0.185729	0.821406	0	-0.166667	-0.166667	0	0.833333	0.333333
93	STAN	5	0.5	0.498216	-0.117943	-0.309339	-0.310388	0.360753	-0.185729	0.821406	0	-0.166667	-0.166667	0	0.833333	0.333333
498	STAN	3	0.5	0.498216	-0.117943	-0.309339	-0.310388	0.360753	-0.185729	-0.178594	0	0	-0.166667	0	0	1.5
498	STAN	4	0.5	0.498216	-0.117943	-0.309339	-0.310388	0.360753	-0.185729	-0.178594	0	0	-0.166667	0	0	0.5
498	STAN	5	0.5	0.498216	-0.117943	-0.309339	-0.310388	0.360753	-0.185729	-0.178594	0	0	-0.166667	0	0	-2.5
674	STAN	6	0.5	-0.501784	-0.117943	-0.309339	-0.310388	0.360753	-0.185729	-0.178594	0.5	-0.166667	0.333333	0	-1.66667	0
674	STAN	7	0.5	-0.501784	-0.117943	-0.309339	-0.310388	0.360753	-0.185729	-0.178594	-0.5	-0.166667	-0.666667	0	-1.66667	0
674	STAN	5	0.5	-0.501784	-0.117943	-0.309339	-0.310388	0.360753	-0.185729	-0.178594	0.5	-0.166667	0.333333	0	0.333333	0
757	STAN	2	0.5	0.498216	-0.117943	0.690661	0.689612	-0.639247	-0.185729	-0.178594	0	0	NA	0	1	NA
757	STAN	7	0.5	0.498216	-0.117943	0.690661	0.689612	-0.639247	-0.185729	-0.178594	0	0	-0.2	0	0	0.2
757	STAN	4	0.5	0.498216	-0.117943	0.690661	0.689612	-0.639247	-0.185729	-0.178594	0	0	-0.2	0	-1	0.2
532	STAN	6	0.5	-0.501784	-0.117943	0.690661	-0.310388	0.360753	-0.185729	-0.178594	0.166667	0	0	0	-1.16667	0.5
532	STAN	4	0.5	-0.501784	-0.117943	0.690661	-0.310388	0.360753	-0.185729	-0.178594	0.166667	0	0	0	-0.166667	0.5
532	STAN	4	0.5	-0.501784	-0.117943	0.690661	-0.310388	0.360753	-0.185729	-0.178594	0.166667	0	0	0	0.833333	0.5
445	STAN	7	0.5	-0.501784	-0.117943	-0.309339	0.689612	-0.639247	-0.185729	-0.178594	0.666667	0.333333	-0.2	0	-0.166667	-0.166667
445	STAN	5	0.5	-0.501784	-0.117943	-0.309339	0.689612	-0.639247	-0.185729	-0.178594	-0.333333	0.333333	0.8	0	-0.166667	-0.166667
445	STAN	2	0.5	-0.501784	-0.117943	-0.309339	0.689612	-0.639247	-0.185729	-0.178594	0.666667	0.333333	-0.2	0	0.833333	0.833333
555	STAN	7	0.5	-0.501784	-0.117943	0.690661	0.689612	-0.639247	0.814271	-0.178594	0.333333	0.166667	0.333333	0	0.666667	0.5
555	STAN	4	0.5	-0.501784	-0.117943	0.690661	0.689612	-0.639247	0.814271	-0.178594	0.333333	0.166667	0.333333	0	0.666667	0.5
555	STAN	5	0.5	-0.501784	-0.117943	0.690661	0.689612	-0.639247	0.814271	-0.178594	0.333333	0.166667	0.333333	0	0.666667	0.5
381	STAN	3	0.5	0.498216	0.882057	0.690661	-0.310388	0.360753	-0.185729	-0.178594	0	0	0	0	0.5	0.666667
381	STAN	3	0.5	0.498216	0.882057	0.690661	-0.310388	0.360753	-0.185729	-0.178594	0	0	0	0	-0.5	-0.333333
381	STAN	4	0.5	0.498216	0.882057	0.690661	-0.310388	0.360753	-0.185729	-0.178594	0	0	0	0	0.5	-0.333333
398	STAN	3	0.5	0.498216	-0.117943	0.690661	-0.310388	0.360753	0.814271	-0.178594	0	-0.166667	-0.333333	0	-0.166667	1
398	STAN	3	0.5	0.498216	-0.117943	0.690661	-0.310388	0.360753	0.814271	-0.178594	0	-0.166667	0.666667	0	-2.16667	0
398	STAN	2	0.5	0.498216	-0.117943	0.690661	-0.310388	0.360753	0.814271	-0.178594	0	-0.166667	0.666667	0	0.833333	0
316	STAN	2	0.5	0.498216	-0.117943	-0.309339	-0.310388	0.360753	-0.185729	-0.178594	0	0	0	0	0.833333	1
316	STAN	5	0.5	0.498216	-0.117943	-0.309339	-0.310388	0.360753	-0.185729	-0.178594	0	0	0	0	-0.166667	0
316	STAN	3	0.5	0.498216	-0.117943	-0.309339	-0.310388	0.360753	-0.185729	-0.178594	0	0	0	0	-0.166667	0
456	STAN	4	0.5	-0.501784	-0.117943	-0.309339	-0.310388	0.360753	-0.185729	-0.178594	0.166667	0	0	0	0.166667	-0.333333
456	STAN	3	0.5	-0.501784	-0.117943	-0.309339	-0.310388	0.360753	-0.185729	-0.178594	0.166667	0	0	0	-1.83333	-0.333333
456	STAN	5	0.5	-0.501784	-0.117943	-0.309339	-0.310388	0.360753	-0.185729	-0.178594	0.166667	0	0	0	0.166667	-0.333333
294	STAN	5	0.5	-0.501784	0.882057	-0.309339	-0.310388	-0.639247	-0.185729	0.821406	-0.333333	0	0	0	0.666667	0.5
294	STAN	2	0.5	-0.501784	0.882057	-0.309339	-0.310388	-0.639247	-0.185729	0.821406	0.666667	0	0	0	0.666667	0.5
294	STAN	3	0.5	-0.501784	0.882057	-0.309339	-0.310388	-0.639247	-0.185729	0.821406	-0.333333	0	0	0	0.666667	0.5
697	STAN	5	0.5	-0.501784	-0.117943	-0.309339	-0.310388	0.360753	-0.185729	-0.178594	NA	0	-0.2	-0.2	0.166667	-0.166667
697	STAN	3	0.5	-0.501784	-0.117943	-0.309339	-0.310388	0.360753	-0.185729	-0.178594	0.5	0	-0.2	-0.2	0.166667	-0.166667
697	STAN	3	0.5	-0.501784	-0.117943	-0.309339	-0.310388	0.360753	-0.185729	-0.178594	0.5	0	-0.2	-0.2	0.166667	-0.166667
505	STAN	6	0.5	-0.501784	-0.117943	-0.309339	-0.310388	0.360753	0.814271	-0.178594	-0.166667	0	0.166667	0	-0.5	-1.5
505	STAN	4	0.5	-0.501784	-0.117943	-0.309339	-0.310388	0.360753	0.814271	-0.178594	0.833333	0	0.166667	0	-0.5	-0.5
505	STAN	2	0.5	-0.501784	-0.117943	-0.309339	-0.310388	0.360753	0.814271	-0.178594	-0.166667	0	0.166667	0	0.5	0.5
462	STAN	1	0.5	0.498216	-0.117943	-0.309339	-0.310388	-0.639247	-0.185729	-0.178594	0	0.5	-0.166667	0	0.666667	0.833333
462	STAN	3	0.5	0.498216	-0.117943	-0.309339	-0.310388	-0.639247	-0.185729	-0.178594	0	0.5	-0.166667	0	-0.333333	-0.166667
462	STAN	2	0.5	0.498216	-0.117943	-0.309339	-0.310388	-0.639247	-0.185729	-0.178594	0	0.5	-0.166667	0	0.666667	-0.166667
658	STAN	2	0.5	0.498216	-0.117943	-0.309339	-0.310388	0.360753	-0.185729	-0.178594	0	0	-0.333333	0	0	-0.333333
658	STAN	3	0.5	0.498216	-0.117943	-0.309339	-0.310388	0.360753	-0.185729	-0.178594	0	0	0.666667	0	0	-0.333333
658	STAN	1	0.5	0.498216	-0.117943	-0.309339	-0.310388	0.360753	-0.185729	-0.178594	0	0	0.666667	0	1	0.666667
396	STAN	4	0.5	0.498216	-0.117943	0.690661	-0.310388	-0.639247	-0.185729	-0.178594	0	0	0.666667	0	0.5	0
396	STAN	2	0.5	0.498216	-0.117943	0.690661	-0.310388	-0.639247	-0.185729	-0.178594	0	0	-0.333333	0	-1.5	0
396	STAN	5	0.5	0.498216	-0.117943	0.690661	-0.310388	-0.639247	-0.185729	-0.178594	0	0	-0.333333	0	-1.5	-2
573	STAN	3	0.5	-0.501784	-0.117943	0.690661	-0.310388	0.360753	-0.185729	-0.178594	0.333333	-0.333333	0	0	1.16667	0.333333
573	STAN	2	0.5	-0.501784	-0.117943	0.690661	-0.310388	0.360753	-0.185729	-0.178594	0.333333	0.666667	0	0	0.166667	0.333333
573	STAN	4	0.5	-0.501784	-0.117943	0.690661	-0.310388	0.360753	-0.185729	-0.178594	0.333333	-0.333333	NA	0	0.166667	0.333333
235	STAN	3	0.5	-0.501784	-0.117943	0.690661	-0.310388	0.360753	0.814271	-0.178594	0.166667	0	0.166667	0	0.5	0.833333
235	STAN	1	0.5	-0.501784	-0.117943	0.690661	-0.310388	0.360753	0.814271	-0.178594	0.166667	0	0.166667	0	0.5	0.833333
235	STAN	2	0.5	-0.501784	-0.117943	0.690661	-0.310388	0.360753	0.814271	-0.178594	0.166667	0	0.166667	0	-0.5	-0.166667
536	STAN	5	0.5	-0.501784	0.882057	-0.309339	-0.310388	0.360753	-0.185729	-0.178594	-0.166667	0	-0.166667	0	0	0.333333
536	STAN	2	0.5	-0.501784	0.882057	-0.309339	-0.310388	0.360753	-0.185729	-0.178594	0.833333	0	-0.166667	0	0	0.333333
536	STAN	2	0.5	-0.501784	0.882057	-0.309339	-0.310388	0.360753	-0.185729	-0.178594	-0.166667	0	-0.166667	0	1	0.333333
675	STAN	6	0.5	-0.501784	-0.117943	-0.309339	-0.310388	-0.639247	0.814271	-0.178594	-0.5	0.333333	0.4	0	-1.16667	-0.333333
675	STAN	5	0.5	-0.501784	-0.117943	-0.309339	-0.310388	-0.639247	0.814271	-0.178594	0.5	0.333333	0.4	0	-0.166667	-0.333333
675	STAN	6	0.5	-0.501784	-0.117943	-0.309339	-0.310388	-0.639247	0.814271	-0.178594	0.5	0.333333	0.4	0	-0.166667	-0.333333
103	STAN	6	0.5	0.498216	-0.117943	-0.309339	-0.310388	0.360753	-0.185729	0.821406	0	-0.166667	0	-0.166667	-0.333333	0.2
103	STAN	2	0.5	0.498216	-0.117943	-0.309339	-0.310388	0.360753	-0.185729	0.821406	0	-0.166667	0	-0.166667	-0.333333	0.2
103	STAN	4	0.5	0.498216	-0.117943	-0.309339	-0.310388	0.360753	-0.185729	0.821406	0	-0.166667	0	-0.166667	-0.333333	0.2
694	STAN	5	0.5	0.498216	-0.117943	-0.309339	-0.310388	0.360753	-0.185729	-0.178594	0	0	0	0	0.166667	0.833333
694	STAN	2	0.5	0.498216	-0.117943	-0.309339	-0.310388	0.360753	-0.185729	-0.178594	0	0	0	0	0.166667	-0.166667
694	STAN	2	0.5	0.498216	-0.117943	-0.309339	-0.310388	0.360753	-0.185729	-0.178594	0	0	0	0	0.166667	-0.166667
669	STAN	3	0.5	0.498216	-0.117943	-0.309339	0.689612	-0.639247	0.814271	-0.178594	0	0.2	-0.4	0	1.4	0.2
669	STAN	4	0.5	0.498216	-0.117943	-0.309339	0.689612	-0.639247	0.814271	-0.178594	0	0.2	-0.4	0	-0.6	0.2
669	STAN	4	0.5	0.498216	-0.117943	-0.309339	0.689612	-0.639247	0.814271	-0.178594	0	0.2	0.6	0	0.4	0.2
457	STAN	3	0.5	-0.501784	-0.117943	-0.309339	0.689612	0.360753	-0.185729	-0.178594	0	0	-0.166667	0	1.16667	1
457	STAN	3	0.5	-0.501784	-0.117943	-0.309339	0.689612	0.360753	-0.185729	-0.178594	0	0	-0.166667	0	0.166667	0
457	STAN	4	0.5	-0.501784	-0.117943	-0.309339	0.689612	0.360753	-0.185729	-0.178594	0	0	-0.166667	0	0.166667	0
472	STAN	1	0.5	0.498216	-0.117943	-0.309339	-0.310388	0.360753	-0.185729	-0.178594	0	NA	-0.166667	0	1.8	1
472	STAN	2	0.5	0.498216	-0.117943	-0.309339	-0.310388	0.360753	-0.185729	-0.178594	0	-0.2	-0.166667	0	NA	0
472	STAN	2	0.5	0.498216	-0.117943	-0.309339	-0.310388	0.360753	-0.185729	-0.178594	0	-0.2	-0.166667	0	-0.2	0
270	STAN	5	0.5	-0.501784	-0.117943	0.690661	0.689612	-0.639247	-0.185729	-0.178594	-0.333333	0.333333	0	0	0.833333	-0.166667
270	STAN	2	0.5	-0.501784	-0.117943	0.690661	0.689612	-0.639247	-0.185729	-0.178594	0.666667	0.333333	0	0	0.833333	0.833333
270	STAN	4	0.5	-0.501784	-0.117943	0.690661	0.689612	-0.639247	-0.185729	-0.178594	-0.333333	0.333333	0	0	-1.16667	-0.166667
361	STAN	3	0.5	-0.501784	-0.117943	-0.309339	0.689612	-0.639247	-0.185729	-0.178594	0	0.166667	0	0	-0.5	0.333333
361	STAN	2	0.5	-0.501784	-0.117943	-0.309339	0.689612	-0.639247	-0.185729	-0.178594	0	0.166667	0	0	0.5	0.333333
361	STAN	7	0.5	-0.501784	-0.117943	-0.309339	0.689612	-0.639247	-0.185729	-0.178594	0	0.166667	0	0	-0.5	-0.666667
213	STAN	3	0.5	-0.501784	-0.117943	-0.309339	-0.310388	0.360753	-0.185729	-0.178594	0.4	-0.2	0.333333	0	0.166667	0
213	STAN	5	0.5	-0.501784	-0.117943	-0.309339	-0.310388	0.360753	-0.185729	-0.178594	0.4	-0.2	-0.666667	0	0.166667	0
213	STAN	6	0.5	-0.501784	-0.117943	-0.309339	-0.310388	0.360753	-0.185729	-0.178594	-0.6	-0.2	-0.666667	0	0.166667	0
488	STAN	2	0.5	0.498216	-0.117943	-0.309339	-0.310388	0.360753	-0.185729	-0.178594	0	0	0	0	-0.5	0.666667
488	STAN	2	0.5	0.498216	-0.117943	-0.309339	-0.310388	0.360753	-0.185729	-0.178594	0	0	0	0	-0.5	-0.333333
488	STAN	1	0.5	0.498216	-0.117943	-0.309339	-0.310388	0.360753	-0.185729	-0.178594	0	0	0	0	0.5	0.666667
704	STAN	7	0.5	0.498216	-0.117943	-0.309339	-0.310388	-0.639247	-0.185729	-0.178594	0	0	-0.166667	0	-2.33333	-2.8
704	STAN	2	0.5	0.498216	-0.117943	-0.309339	-0.310388	-0.639247	-0.185729	-0.178594	0	0	-0.166667	0	1.66667	1.2
704	STAN	3	0.5	0.498216	-0.117943	-0.309339	-0.310388	-0.639247	-0.185729	-0.178594	NA	0	-0.166667	0	1.66667	1.2
542	STAN	2	0.5	0.498216	-0.117943	0.690661	-0.310388	0.360753	0.814271	-0.178594	0	0	0	0	0.2	0.2
542	STAN	2	0.5	0.498216	-0.117943	0.690661	-0.310388	0.360753	0.814271	-0.178594	0	0	0	0	0.2	0.2
542	STAN	3	0.5	0.498216	-0.117943	0.690661	-0.310388	0.360753	0.814271	-0.178594	0	0	0	0	0.2	0.2
139	STAN	3	0.6	0.498216	-0.117943	0.690661	-0.310388	0.360753	-0.185729	-0.178594	0	0	0	0	0.2	0.2
139	STAN	4	0.6	0.498216	-0.117943	0.690661	-0.310388	0.360753	-0.185729	-0.178594	0	0	0	0	0.2	0.2
415	STAN	2	0.5	-0.501784	-0.117943	0.690661	-0.310388	0.360753	-0.185729	-0.178594	0.666667	0.5	-0.2	0	-0.4	-0.2
415	STAN	4	0.5	-0.501784	-0.117943	0.690661	-0.310388	0.360753	-0.185729	-0.178594	-0.333333	0.5	-0.2	0	-0.4	-0.2
415	STAN	3	0.5	-0.501784	-0.117943	0.690661	-0.310388	0.360753	-0.185729	-0.178594	-0.333333	0.5	NA	0	NA	NA
241	STAN	2	0.5	0.498216	-0.117943	0.690661	0.689612	-0.639247	-0.185729	-0.178594	-0.166667	0	-0.166667	0	0.333333	0.5
241	STAN	4	0.5	0.498216	-0.117943	0.690661	0.689612	-0.639247	-0.185729	-0.178594	-0.166667	0	0.833333	0	-0.666667	-0.5
241	STAN	2	0.5	0.498216	-0.117943	0.690661	0.689612	-0.639247	-0.185729	-0.178594	-0.166667	0	-0.166667	0	0.333333	0.5
359	STAN	2	0.5	0.498216	-0.117943	-0.309339	-0.310388	0.360753	-0.185729	-0.178594	0	-0.166667	0	0	-0.333333	-0.166667
359	STAN	3	0.5	0.498216	-0.117943	-0.309339	-0.310388	0.360753	-0.185729	-0.178594	0	-0.166667	0	0	-0.333333	-0.166667
359	STAN	1	0.5	0.498216	-0.117943	-0.309339	-0.310388	0.360753	-0.185729	-0.178594	0	-0.166667	0	0	0.666667	0.833333
321	STAN	3	0.5	-0.501784	-0.117943	-0.309339	0.689612	0.360753	0.814271	-0.178594	0.666667	-0.5	-0.333333	0	1	1
321	STAN	3	0.5	-0.501784	-0.117943	-0.309339	0.689612	0.360753	0.814271	-0.178594	-0.333333	0.5	0.666667	0	0	1
321	STAN	3	0.5	-0.501784	-0.117943	-0.309339	0.689612	0.360753	0.814271	-0.178594	-0.333333	-0.5	0.666667	0	0	0
706	STAN	5	0.5	0.498216	-0.117943	-0.309339	-0.310388	0.360753	-0.185729	-0.178594	-0.166667	-0.166667	0	0	1.16667	-0.166667
706	STAN	4	0.5	0.498216	-0.117943	-0.309339	-0.310388	0.360753	-0.185729	-0.178594	-0.166667	-0.166667	0	0	-1.83333	-0.166667
706	STAN	4	0.5	0.498216	-0.117943	-0.309339	-0.310388	0.360753	-0.185729	-0.178594	-0.166667	-0.166667	0	0	0.166667	-0.166667
503	STAN	6	0.5	-0.501784	-0.117943	-0.309339	-0.310388	0.360753	-0.185729	0.821406	-0.666667	0	0	0	-0.5	-1.5
503	STAN	5	0.5	-0.501784	-0.117943	-0.309339	-0.310388	0.360753	-0.185729	0.821406	0.333333	0	0	0	-1.5	0.5
503	STAN	7	0.5	-0.501784	-0.117943	-0.309339	-0.310388	0.360753	-0.185729	0.821406	0.333333	0	0	0	1.5	1.5
512	STAN	2	0.5	-0.501784	-0.117943	-0.309339	0.689612	-0.639247	0.814271	-0.178594	0.333333	0.333333	0.166667	0	0	0.166667
512	STAN	2	0.5	-0.501784	-0.117943	-0.309339	0.689612	-0.639247	0.814271	-0.178594	0.333333	0.333333	0.166667	0	1	0.166667
512	STAN	6	0.5	-0.501784	-0.117943	-0.309339	0.689612	-0.639247	0.814271	-0.178594	0.333333	0.333333	0.166667	0	-2	0.166667
686	STAN	5	0.5	0.498216	-0.117943	-0.309339	-0.310388	-0.639247	-0.185729	-0.178594	NA	NA	NA	NA	0	-0.4
686	STAN	3	0.5	0.498216	-0.117943	-0.309339	-0.310388	-0.639247	-0.185729	-0.178594	0	0.4	0	0	0	-0.4
686	STAN	3	0.5	0.498216	-0.117943	-0.309339	-0.310388	-0.639247	-0.185729	-0.178594	0	0.4	0	0	0	0.6
125	STAN	5	0.5	0.498216	-0.117943	0.690661	-0.310388	0.360753	0.814271	-0.178594	0	0	0	0	-0.833333	0
125	STAN	3	0.5	0.498216	-0.117943	0.690661	-0.310388	0.360753	0.814271	-0.178594	NA	NA	NA	NA	1.16667	0
125	STAN	5	0.5	0.498216	-0.117943	0.690661	-0.310388	0.360753	0.814271	-0.178594	0	0	0	0	-1.83333	0
680	STAN	6	0.5	-0.501784	-0.117943	-0.309339	0.689612	-0.639247	-0.185729	-0.178594	0	0.5	NA	0	0.166667	0.5
680	STAN	4	0.5	-0.501784	-0.117943	-0.309339	0.689612	-0.639247	-0.185729	-0.178594	0	0.5	0	0	0.166667	0.5
680	STAN	4	0.5	-0.501784	-0.117943	-0.309339	0.689612	-0.639247	-0.185729	-0.178594	0	0.5	0	0	-0.833333	-1.5
638	STAN	3	0.5	-0.501784	-0.117943	-0.309339	-0.310388	0.360753	0.814271	-0.178594	-0.6	0.833333	0	-0.2	-0.833333	-0.166667
638	STAN	4	0.5	-0.501784	-0.117943	-0.309339	-0.310388	0.360753	0.814271	-0.178594	0.4	-0.166667	0	-0.2	0.166667	-0.166667
638	STAN	5	0.5	-0.501784	-0.117943	-0.309339	-0.310388	0.360753	0.814271	-0.178594	0.4	-0.166667	0	-0.2	0.166667	-0.166667
274	STAN	4	0.5	-0.501784	-0.117943	-0.309339	0.689612	-0.639247	-0.185729	-0.178594	-0.833333	0	0	0	0.166667	NA
274	STAN	2	0.5	-0.501784	-0.117943	-0.309339	0.689612	-0.639247	-0.185729	-0.178594	0.166667	0	0	0	0.166667	-0.4
274	STAN	3	0.5	-0.501784	-0.117943	-0.309339	0.689612	-0.639247	-0.185729	-0.178594	0.166667	0	0	0	0.166667	0.6
206	STAN	2	0.5	-0.501784	-0.117943	-0.309339	-0.310388	0.360753	-0.185729	-0.178594	0	0	0	0	0.666667	0.5
206	STAN	3	0.5	-0.501784	-0.117943	-0.309339	-0.310388	0.360753	-0.185729	-0.178594	0	0	0	0	0.666667	0.5
206	STAN	5	0.5	-0.501784	-0.117943	-0.309339	-0.310388	0.360753	-0.185729	-0.178594	0	0	0	0	-0.333333	-0.5
239	STAN	7	0.5	0.498216	-0.117943	0.690661	-0.310388	0.360753	-0.185729	-0.178594	0	0	0	0	-2.16667	-0.166667
239	STAN	3	0.5	0.498216	-0.117943	0.690661	-0.310388	0.360753	-0.185729	-0.178594	0	0	0	0	0.833333	-0.166667
239	STAN	3	0.5	0.498216	-0.117943	0.690661	-0.310388	0.360753	-0.185729	-0.178594	0	0	0	0	1.83333	0.833333
309	STAN	4	0.5	0.498216	-0.117943	-0.309339	0.689612	0.360753	-0.185729	-0.178594	0	-0.333333	0.5	0	0.333333	0.333333
309	STAN	3	0.5	0.498216	-0.117943	-0.309339	0.689612	0.360753	-0.185729	-0.178594	0	-0.333333	0.5	0	0.333333	0.333333
309	STAN	4	0.5	0.498216	-0.117943	-0.309339	0.689612	0.360753	-0.185729	-0.178594	0	-0.333333	-0.5	0	0.333333	0.333333
352	STAN	4	0.5	-0.501784	-0.117943	-0.309339	-0.310388	0.360753	0.814271	-0.178594	-0.2	-0.166667	0	-0.166667	-0.333333	-0.833333
352	STAN	5	0.5	-0.501784	-0.117943	-0.309339	-0.310388	0.360753	0.814271	-0.178594	-0.2	-0.166667	0	-0.166667	0.666667	0.166667
352	STAN	5	0.5	-0.501784	-0.117943	-0.309339	-0.310388	0.360753	0.814271	-0.178594	0.8	-0.166667	0	0.833333	-2.33333	0.166667
667	STAN	4	0.5	0.498216	-0.117943	-0.309339	-0.310388	0.360753	-0.185729	0.821406	-0.2	-0.166667	0	0	-0.5	-0.166667
667	STAN	3	0.5	0.498216	-0.117943	-0.309339	-0.310388	0.360753	-0.185729	0.821406	-0.2	-0.166667	0	0	0.5	0.833333
667	STAN	5	0.5	0.498216	-0.117943	-0.309339	-0.310388	0.360753	-0.185729	0.821406	0.8	0.833333	0	0	-0.5	-1.16667
174	STAN	2	0.4	-0.501784	-0.117943	-0.309339	-0.310388	0.360753	-0.185729	-0.178594	0.4	0	0	0	0.2	0.4
174	STAN	2	0.4	-0.501784	-0.117943	-0.309339	-0.310388	0.360753	-0.185729	-0.178594	0.4	0	0	0	0.2	0.4
174	STAN	4	0.4	-0.501784	-0.117943	-0.309339	-0.310388	0.360753	-0.185729	-0.178594	0.4	0	0	0	0.2	0.4
196	STAN	2	0.5	-0.501784	-0.117943	-0.309339	-0.310388	0.360753	-0.185729	-0.178594	0.833333	-0.166667	-0.5	0	0.833333	0.666667
196	STAN	3	0.5	-0.501784	-0.117943	-0.309339	-0.310388	0.360753	-0.185729	-0.178594	-0.166667	-0.166667	-0.5	0	-0.166667	-0.333333
196	STAN	4	0.5	-0.501784	-0.117943	-0.309339	-0.310388	0.360753	-0.185729	-0.178594	-0.166667	-0.166667	0.5	0	-0.166667	-0.333333
603	STAN	2	0.5	0.498216	-0.117943	-0.309339	0.689612	-0.639247	-0.185729	-0.178594	0	0.166667	0	0	0.833333	0.666667
603	STAN	4	0.5	0.498216	-0.117943	-0.309339	0.689612	-0.639247	-0.185729	-0.178594	0	0.166667	0	0	-0.166667	0.666667
603	STAN	3	0.5	0.498216	-0.117943	-0.309339	0.689612	-0.639247	-0.185729	-0.178594	0	0.166667	0	0	-0.166667	-0.333333
527	STAN	4	0.5	-0.501784	-0.117943	-0.309339	0.689612	0.360753	-0.185729	-0.178594	0.833333	0	-0.5	0	0.666667	1.33333
527	STAN	5	0.5	-0.501784	-0.117943	-0.309339	0.689612	0.360753	-0.185729	-0.178594	-0.166667	0	0.5	0	-0.333333	0.333333
527	STAN	3	0.5	-0.501784	-0.117943	-0.309339	0.689612	0.360753	-0.185729	-0.178594	-0.166667	0	0.5	0	0.666667	-0.666667
759	STAN	6	0.5	-0.501784	-0.117943	0.690661	-0.310388	-0.639247	0.814271	-0.178594	0.5	0.166667	0.166667	-0.166667	1	-1
759	STAN	5	0.5	-0.501784	-0.117943	0.690661	-0.310388	-0.639247	0.814271	-0.178594	-0.5	0.166667	0.166667	-0.166667	0	-1
759	STAN	7	0.5	-0.501784	-0.117943	0.690661	-0.310388	-0.639247	0.814271	-0.178594	-0.5	0.166667	0.166667	-0.166667	0	1
346	STAN	5	0.5	-0.501784	-0.117943	-0.309339	-0.310388	-0.639247	-0.185729	-0.178594	0.2	0.166667	-0.666667	0	0.5	-0.166667
346	STAN	3	0.5	-0.501784	-0.117943	-0.309339	-0.310388	-0.639247	-0.185729	-0.178594	0.2	0.166667	0.333333	0	0.5	0.833333
346	STAN	3	0.5	-0.501784	-0.117943	-0.309339	-0.310388	-0.639247	-0.185729	-0.178594	0.2	0.166667	0.333333	0	0.5	-0.166667
255	STAN	3	0.5	0.498216	-0.117943	0.690661	-0.310388	0.360753	-0.185729	0.821406	0	0	0	-0.166667	-0.333333	0.666667
255	STAN	3	0.5	0.498216	-0.117943	0.690661	-0.310388	0.360753	-0.185729	0.821406	0	0	0	-0.166667	0.666667	-0.333333
255	STAN	2	0.5	0.498216	-0.117943	0.690661	-0.310388	0.360753	-0.185729	0.821406	0	0	0	-0.166667	-0.333333	-0.333333
197	STAN	2	0.6	0.498216	-0.117943	-0.309339	0.689612	-0.639247	0.814271	-0.178594	0	0.4	0.2	0	1.8	1
197	STAN	5	0.6	0.498216	-0.117943	-0.309339	0.689612	-0.639247	0.814271	-0.178594	0	0.4	0.2	0	-0.2	0
365	STAN	5	0.5	0.498216	-0.117943	-0.309339	-0.310388	0.360753	-0.185729	-0.178594	0	0	NA	-0.166667	1.16667	1.16667
365	STAN	5	0.5	0.498216	-0.117943	-0.309339	-0.310388	0.360753	-0.185729	-0.178594	0	0	0.6	-0.166667	-1.83333	0.166667
365	STAN	7	0.5	0.498216	-0.117943	-0.309339	-0.310388	0.360753	-0.185729	-0.178594	0	0	-0.4	-0.166667	-0.833333	1.16667
110	STAN	5	0.5	0.498216	-0.117943	0.690661	-0.310388	0.360753	-0.185729	-0.178594	0	0	0	0	-0.166667	-0.166667
110	STAN	4	0.5	0.498216	-0.117943	0.690661	-0.310388	0.360753	-0.185729	-0.178594	0	0	NA	0	0.833333	0.833333
110	STAN	5	0.5	0.498216	-0.117943	0.690661	-0.310388	0.360753	-0.185729	-0.178594	0	0	0	0	-0.166667	-0.166667
106	STAN	3	0.5	-0.501784	-0.117943	-0.309339	0.689612	-0.639247	-0.185729	0.821406	0.166667	0.166667	-0.166667	0	1.83333	1.5
106	STAN	6	0.5	-0.501784	-0.117943	-0.309339	0.689612	-0.639247	-0.185729	0.821406	0.166667	0.166667	-0.166667	0	-1.16667	-1.5
106	STAN	6	0.5	-0.501784	-0.117943	-0.309339	0.689612	-0.639247	-0.185729	0.821406	0.166667	-0.833333	-0.166667	0	0.833333	0.5
233	STAN	2	0.5	0.498216	-0.117943	0.690661	-0.310388	-0.639247	-0.185729	-0.178594	0	0.2	0	0	1.16667	0.333333
233	STAN	3	0.5	0.498216	-0.117943	0.690661	-0.310388	-0.639247	-0.185729	-0.178594	0	0.2	NA	0	0.166667	0.333333
233	STAN	3	0.5	0.498216	-0.117943	0.690661	-0.310388	-0.639247	-0.185729	-0.178594	0	0.2	0	0	0.166667	0.333333
548	STAN	4	0.5	-0.501784	0.882057	-0.309339	-0.310388	0.360753	-0.185729	0.821406	0	0	0	0	-0.666667	-0.166667
548	STAN	2	0.5	-0.501784	0.882057	-0.309339	-0.310388	0.360753	-0.185729	0.821406	0	0	0	0	0.333333	-1.16667
548	STAN	3	0.5	-0.501784	0.882057	-0.309339	-0.310388	0.360753	-0.185729	0.821406	0	0	0	0	-0.666667	0.833333
571	STAN	5	0.5	-0.501784	-0.117943	0.690661	0.689612	-0.639247	-0.185729	-0.178594	0.6	0.2	0	0	-0.666667	-1.16667
571	STAN	1	0.5	-0.501784	-0.117943	0.690661	0.689612	-0.639247	-0.185729	-0.178594	-0.4	0.2	0	0	2.33333	1.83333
571	STAN	7	0.5	-0.501784	-0.117943	0.690661	0.689612	-0.639247	-0.185729	-0.178594	-0.4	0.2	0	0	-1.66667	-2.16667
221	STAN	5	0.5	0.498216	-0.117943	-0.309339	-0.310388	0.360753	-0.185729	-0.178594	0	0	-0.166667	0	0.833333	1.33333
221	STAN	6	0.5	0.498216	-0.117943	-0.309339	-0.310388	0.360753	-0.185729	-0.178594	0	0	-0.166667	0	-0.166667	-0.666667
221	STAN	3	0.5	0.498216	-0.117943	-0.309339	-0.310388	0.360753	-0.185729	-0.178594	0	0	-0.166667	0	0.833333	0.333333
737	STAN	3	0.5	0.498216	-0.117943	0.690661	-0.310388	-0.639247	-0.185729	0.821406	0	-0.5	0	0	-0.5	0.333333
737	STAN	4	0.5	0.498216	-0.117943	0.690661	-0.310388	-0.639247	-0.185729	0.821406	0	0.5	0	0	0.5	0.333333
737	STAN	4	0.5	0.498216	-0.117943	0.690661	-0.310388	-0.639247	-0.185729	0.821406	0	0.5	NA	NA	0.5	0.333333
259	STAN	3	0.5	0.498216	0.882057	-0.309339	-0.310388	0.360753	-0.185729	-0.178594	0	0	0	0	0.5	1
259	STAN	2	0.5	0.498216	0.882057	-0.309339	-0.310388	0.360753	-0.185729	-0.178594	0	0	0	0	0.5	0
259	STAN	2	0.5	0.498216	0.882057	-0.309339	-0.310388	0.360753	-0.185729	-0.178594	0	0	0	0	0.5	-1
119	STAN	6	0.5	-0.501784	-0.117943	-0.309339	-0.310388	0.360753	-0.185729	-0.178594	-0.166667	0	0	0	0	0.333333
119	STAN	4	0.5	-0.501784	-0.117943	-0.309339	-0.310388	0.360753	-0.185729	-0.178594	-0.166667	0	0	0	0	0.333333
119	STAN	4	0.5	-0.501784	-0.117943	-0.309339	-0.310388	0.360753	-0.185729	-0.178594	0.833333	0	0	0	0	-0.666667
455	STAN	4	0.5	0.498216	-0.117943	-0.309339	-0.310388	0.360753	0.814271	-0.178594	0	0	0	0	0.6	0
455	STAN	5	0.5	0.498216	-0.117943	-0.309339	-0.310388	0.360753	0.814271	-0.178594	0	0	0	0	0.6	-1
455	STAN	6	0.5	0.498216	-0.117943	-0.309339	-0.310388	0.360753	0.814271	-0.178594	0	0	0	0	-2.4	0
305	STAN	4	0.5	0.498216	-0.117943	-0.309339	-0.310388	0.360753	-0.185729	-0.178594	0	0	0	0	-2	-1
305	STAN	4	0.5	0.498216	-0.117943	-0.309339	-0.310388	0.360753	-0.185729	-0.178594	0	0	0	0	1	NA
305	STAN	2	0.5	0.498216	-0.117943	-0.309339	-0.310388	0.360753	-0.185729	-0.178594	0	0	0	0	0	0
156	STAN	7	0.5	-0.501784	-0.117943	-0.309339	0.689612	0.360753	0.814271	-0.178594	0	-0.333333	0.5	-0.166667	-1	0.333333
156	STAN	3	0.5	-0.501784	-0.117943	-0.309339	0.689612	0.360753	0.814271	-0.178594	0	-0.333333	-0.5	-0.166667	1	0.333333
156	STAN	6	0.5	-0.501784	-0.117943	-0.309339	0.689612	0.360753	0.814271	-0.178594	0	-0.333333	0.5	-0.166667	-1	0.333333
392	STAN	4	0.5	0.498216	-0.117943	0.690661	-0.310388	0.360753	-0.185729	0.821406	-0.166667	0	0	0	-1.33333	-0.833333
392	STAN	4	0.5	0.498216	-0.117943	0.690661	-0.310388	0.360753	-0.185729	0.821406	0.833333	0	0	0	0.666667	0.166667
392	STAN	5	0.5	0.498216	-0.117943	0.690661	-0.310388	0.360753	-0.185729	0.821406	-0.166667	0	0	0	-0.333333	0.166667
734	STAN	1	0.5	0.498216	0.882057	-0.309339	0.689612	0.360753	-0.185729	-0.178594	0	-0.166667	0	0	0.5	0.333333
734	STAN	2	0.5	0.498216	0.882057	-0.309339	0.689612	0.360753	-0.185729	-0.178594	0	-0.166667	0	0	0.5	0.333333
734	STAN	1	0.5	0.498216	0.882057	-0.309339	0.689612	0.360753	-0.185729	-0.178594	0	-0.166667	0	0	0.5	0.333333
781	STAN	4	0.5	-0.501784	-0.117943	-0.309339	-0.310388	NA	-0.185729	0.821406	0	0	0	0	-0.166667	0.166667
781	STAN	4	0.5	-0.501784	-0.117943	-0.309339	-0.310388	NA	-0.185729	0.821406	0	0	0	0	-0.166667	0.166667
781	STAN	4	0.5	-0.501784	-0.117943	-0.309339	-0.310388	NA	-0.185729	0.821406	0	0	0	0	-0.166667	0.166667
552	STAN	3	0.5	-0.501784	-0.117943	0.690661	-0.310388	0.360753	0.814271	-0.178594	0.5	0	0.333333	0	-0.5	0
552	STAN	3	0.5	-0.501784	-0.117943	0.690661	-0.310388	0.360753	0.814271	-0.178594	0.5	0	0.333333	NA	-0.5	-1
552	STAN	2	0.5	-0.501784	-0.117943	0.690661	-0.310388	0.360753	0.814271	-0.178594	-0.5	0	0.333333	0	0.5	1
214	STAN	5	0.5	-0.501784	-0.117943	-0.309339	-0.310388	0.360753	-0.185729	-0.178594	NA	0	-0.5	0	1.16667	0.5
214	STAN	4	0.5	-0.501784	-0.117943	-0.309339	-0.310388	0.360753	-0.185729	-0.178594	-0.2	0	0.5	0	1.16667	0.5
214	STAN	7	0.5	-0.501784	-0.117943	-0.309339	-0.310388	0.360753	-0.185729	-0.178594	0.8	0	-0.5	0	-0.833333	-0.5
604	STAN	2	0.5	0.498216	-0.117943	-0.309339	0.689612	-0.639247	-0.185729	-0.178594	0	0.333333	-0.166667	0	-0.166667	0.333333
604	STAN	4	0.5	0.498216	-0.117943	-0.309339	0.689612	-0.639247	-0.185729	-0.178594	0	0.333333	-0.166667	0	-0.166667	-0.666667
604	STAN	4	0.5	0.498216	-0.117943	-0.309339	0.689612	-0.639247	-0.185729	-0.178594	0	0.333333	-0.166667	0	0.833333	0.333333
684	STAN	4	0.5	-0.501784	-0.117943	-0.309339	0.689612	0.360753	-0.185729	-0.178594	0.5	0	0	0	1.5	0
684	STAN	2	0.5	-0.501784	-0.117943	-0.309339	0.689612	0.360753	-0.185729	-0.178594	0.5	0	0	0	0.5	0
684	STAN	5	0.5	-0.501784	-0.117943	-0.309339	0.689612	0.360753	-0.185729	-0.178594	0.5	0	0	0	0.5	0
530	STAN	2	0.5	0.498216	0.882057	-0.309339	-0.310388	-0.639247	-0.185729	-0.178594	0	0.166667	0	0	0.666667	0.833333
530	STAN	3	0.5	0.498216	0.882057	-0.309339	-0.310388	-0.639247	-0.185729	-0.178594	0	0.166667	0	0	0.666667	-0.166667
530	STAN	6	0.5	0.498216	0.882057	-0.309339	-0.310388	-0.639247	-0.185729	-0.178594	0	0.166667	0	0	-0.333333	-0.166667
387	STAN	3	0.5	-0.501784	-0.117943	0.690661	-0.310388	0.360753	0.814271	-0.178594	0.666667	0	0.166667	0	1.5	0.5
387	STAN	3	0.5	-0.501784	-0.117943	0.690661	-0.310388	0.360753	0.814271	-0.178594	-0.333333	0	0.166667	0	-1.5	0.5
387	STAN	6	0.5	-0.501784	-0.117943	0.690661	-0.310388	0.360753	0.814271	-0.178594	0.666667	0	0.166667	0	0.5	0.5
558	STAN	4	0.5	-0.501784	-0.117943	0.690661	0.689612	-0.639247	0.814271	-0.178594	0	0.166667	0.5	0	0.5	0.833333
558	STAN	4	0.5	-0.501784	-0.117943	0.690661	0.689612	-0.639247	0.814271	-0.178594	0	0.166667	0.5	0	0.5	0.833333
558	STAN	6	0.5	-0.501784	-0.117943	0.690661	0.689612	-0.639247	0.814271	-0.178594	0	0.166667	0.5	0	0.5	0.833333
576	STAN	2	0.75	-0.501784	-0.117943	-0.309339	-0.310388	0.360753	-0.185729	-0.178594	0.333333	0	0	0	0.5	-0.25
784	STAN	4	0.5	-0.501784	-0.117943	-0.309339	-0.310388	-0.639247	-0.185729	-0.178594	-0.166667	0.5	-0.166667	0	0.333333	0.4
784	STAN	6	0.5	-0.501784	-0.117943	-0.309339	-0.310388	-0.639247	-0.185729	-0.178594	0.833333	0.5	-0.166667	0	0.333333	0.4
784	STAN	5	0.5	-0.501784	-0.117943	-0.309339	-0.310388	-0.639247	-0.185729	-0.178594	-0.166667	0.5	-0.166667	0	-1.66667	-1.6
531	STAN	1	0.5	0.498216	-0.117943	0.690661	-0.310388	0.360753	-0.185729	-0.178594	0	0	0.8	0	0.833333	0.6
531	STAN	7	0.5	0.498216	-0.117943	0.690661	-0.310388	0.360753	-0.185729	-0.178594	0	0	-0.2	0	-2.16667	-0.4
531	STAN	3	0.5	0.498216	-0.117943	0.690661	-0.310388	0.360753	-0.185729	-0.178594	0	0	-0.2	0	0.833333	0.6
384	STAN	6	0.5	0.498216	0.882057	-0.309339	-0.310388	0.360753	-0.185729	-0.178594	0	-0.333333	0	0	-1	-1.8
384	STAN	1	0.5	0.498216	0.882057	-0.309339	-0.310388	0.360753	-0.185729	-0.178594	0	-0.333333	0	0	0	1.2
384	STAN	4	0.5	0.498216	0.882057	-0.309339	-0.310388	0.360753	-0.185729	-0.178594	0	-0.333333	0	0	0	0.2
401	STAN	3	0.5	0.498216	0.882057	0.690661	-0.310388	0.360753	-0.185729	-0.178594	0.833333	0	0	0	1.16667	0.5
401	STAN	2	0.5	0.498216	0.882057	0.690661	-0.310388	0.360753	-0.185729	-0.178594	-0.166667	0	0	0	0.166667	0.5
401	STAN	5	0.5	0.498216	0.882057	0.690661	-0.310388	0.360753	-0.185729	-0.178594	-0.166667	0	0	0	-0.833333	0.5
554	STAN	1	0.5	0.498216	-0.117943	0.690661	0.689612	0.360753	-0.185729	-0.178594	0	NA	0	0	0.666667	0.5
554	STAN	3	0.5	0.498216	-0.117943	0.690661	0.689612	0.360753	-0.185729	-0.178594	0	0	0	0	-0.333333	-0.5
554	STAN	3	0.5	0.498216	-0.117943	0.690661	0.689612	0.360753	-0.185729	-0.178594	0	0	0	0	0.666667	0.5
624	STAN	4	0.5	-0.501784	-0.117943	-0.309339	-0.310388	0.360753	-0.185729	-0.178594	0.4	0	0	0	-0.333333	0.2
624	STAN	4	0.5	-0.501784	-0.117943	-0.309339	-0.310388	0.360753	-0.185729	-0.178594	0.4	0	0	0	-0.333333	NA
624	STAN	4	0.5	-0.501784	-0.117943	-0.309339	-0.310388	0.360753	-0.185729	-0.178594	0.4	0	0	0	0.666667	0.2
138	STAN	4	0.5	-0.501784	0.882057	0.690661	-0.310388	0.360753	-0.185729	-0.178594	0.5	0	0	0	1.66667	1.4
138	STAN	3	0.5	-0.501784	0.882057	0.690661	-0.310388	0.360753	-0.185729	-0.178594	-0.5	0	0	0	0.666667	NA
138	STAN	6	0.5	-0.501784	0.882057	0.690661	-0.310388	0.360753	-0.185729	-0.178594	0.5	0	0	0	-2.33333	0.4
273	STAN	3	0.5	0.498216	-0.117943	0.690661	-0.310388	0.360753	-0.185729	-0.178594	0	-0.166667	0	0	1	0.666667
273	STAN	5	0.5	0.498216	-0.117943	0.690661	-0.310388	0.360753	-0.185729	-0.178594	0	-0.166667	0	0	-1	-1.33333
273	STAN	3	0.5	0.498216	-0.117943	0.690661	-0.310388	0.360753	-0.185729	-0.178594	0	-0.166667	NA	0	0	0.666667
729	STAN	2	0.5	0.498216	0.882057	-0.309339	-0.310388	-0.639247	-0.185729	-0.178594	0	0.166667	-0.166667	0	0.833333	1
729	STAN	3	0.5	0.498216	0.882057	-0.309339	-0.310388	-0.639247	-0.185729	-0.178594	0	0.166667	-0.166667	0	-0.166667	0
729	STAN	4	0.5	0.498216	0.882057	-0.309339	-0.310388	-0.639247	-0.185729	-0.178594	0	0.166667	-0.166667	0	-0.166667	0
231	STAN	2	0.5	0.498216	-0.117943	-0.309339	-0.310388	-0.639247	-0.185729	-0.178594	0	0.166667	0	0	0.833333	1
231	STAN	6	0.5	0.498216	-0.117943	-0.309339	-0.310388	-0.639247	-0.185729	-0.178594	0	0.166667	0	0	-0.166667	0
231	STAN	4	0.5	0.498216	-0.117943	-0.309339	-0.310388	-0.639247	-0.185729	-0.178594	0	0.166667	0	0	-0.166667	1
102	STAN	4	0.5	0.498216	-0.117943	-0.309339	-0.310388	-0.639247	-0.185729	-0.178594	0	0.166667	-0.333333	-0.166667	1.33333	1.33333
102	STAN	6	0.5	0.498216	-0.117943	-0.309339	-0.310388	-0.639247	-0.185729	-0.178594	0	0.166667	-0.333333	-0.166667	-0.666667	-1.66667
102	STAN	2	0.5	0.498216	-0.117943	-0.309339	-0.310388	-0.639247	-0.185729	-0.178594	0	0.166667	-0.333333	-0.166667	2.33333	1.33333
761	STAN	5	0.5	-0.501784	-0.117943	-0.309339	-0.310388	-0.639247	-0.185729	-0.178594	0.5	0.5	0	0	-0.833333	0
761	STAN	2	0.5	-0.501784	-0.117943	-0.309339	-0.310388	-0.639247	-0.185729	-0.178594	0.5	0.5	0	0	1.16667	1
761	STAN	4	0.5	-0.501784	-0.117943	-0.309339	-0.310388	-0.639247	-0.185729	-0.178594	0.5	0.5	0	0	0.166667	0
220	STAN	2	0.5	-0.501784	-0.117943	-0.309339	0.689612	0.360753	0.814271	-0.178594	-0.166667	-0.5	0.5	0	0.833333	-0.333333
220	STAN	2	0.5	-0.501784	-0.117943	-0.309339	0.689612	0.360753	0.814271	-0.178594	-0.166667	-0.5	0.5	0	-0.166667	0.666667
220	STAN	2	0.5	-0.501784	-0.117943	-0.309339	0.689612	0.360753	0.814271	-0.178594	0.833333	-0.5	0.5	0	0.833333	0.666667
580	STAN	2	0.5	0.498216	0.882057	-0.309339	-0.310388	0.360753	-0.185729	-0.178594	0	NA	0	NA	0	0.166667
580	STAN	2	0.5	0.498216	0.882057	-0.309339	-0.310388	0.360753	-0.185729	-0.178594	0	-0.2	0	0	NA	0.166667
580	STAN	4	0.5	0.498216	0.882057	-0.309339	-0.310388	0.360753	-0.185729	-0.178594	0	-0.2	0	0	1	1.16667
562	STAN	2	0.5	0.498216	-0.117943	0.690661	-0.310388	0.360753	-0.185729	-0.178594	0	-0.166667	-0.166667	-0.166667	0.666667	0.5
562	STAN	5	0.5	0.498216	-0.117943	0.690661	-0.310388	0.360753	-0.185729	-0.178594	0	-0.166667	-0.166667	-0.166667	-1.33333	0.5
562	STAN	4	0.5	0.498216	-0.117943	0.690661	-0.310388	0.360753	-0.185729	-0.178594	0	-0.166667	-0.166667	0.833333	-1.33333	-1.5
386	STAN	3	0.5	-0.501784	-0.117943	0.690661	0.689612	-0.639247	-0.185729	-0.178594	-0.166667	0.5	0	0	NA	NA
386	STAN	3	0.5	-0.501784	-0.117943	0.690661	0.689612	-0.639247	-0.185729	-0.178594	-0.166667	0.5	0	0	1	-1.4
386	STAN	4	0.5	-0.501784	-0.117943	0.690661	0.689612	-0.639247	-0.185729	-0.178594	0.833333	0.5	NA	0	0	0.6
237	STAN	6	0.5	0.498216	-0.117943	0.690661	-0.310388	0.360753	-0.185729	-0.178594	0	0	0	0	0.333333	1
237	STAN	2	0.5	0.498216	-0.117943	0.690661	-0.310388	0.360753	-0.185729	-0.178594	0	0	NA	0	0.333333	0
237	STAN	4	0.5	0.498216	-0.117943	0.690661	-0.310388	0.360753	-0.185729	-0.178594	0	0	0	0	-1.66667	-1
468	STAN	5	0.5	0.498216	-0.117943	-0.309339	-0.310388	0.360753	-0.185729	-0.178594	0	0	0	0	-1.5	-2.83333
468	STAN	5	0.5	0.498216	-0.117943	-0.309339	-0.310388	0.360753	-0.185729	-0.178594	0	0	0	0	-0.5	0.166667
468	STAN	3	0.5	0.498216	-0.117943	-0.309339	-0.310388	0.360753	-0.185729	-0.178594	0	0	0	0	0.5	1.16667
118	STAN	4	0.5	0.498216	0.882057	0.690661	-0.310388	0.360753	-0.185729	-0.178594	-0.166667	-0.166667	0	0	0	0.833333
118	STAN	2	0.5	0.498216	0.882057	0.690661	-0.310388	0.360753	-0.185729	-0.178594	-0.166667	-0.166667	0	0	0	-0.166667
118	STAN	4	0.5	0.498216	0.882057	0.690661	-0.310388	0.360753	-0.185729	-0.178594	-0.166667	-0.166667	NA	0	0	0.833333
614	STAN	5	0.5	-0.501784	-0.117943	-0.309339	-0.310388	0.360753	0.814271	0.821406	0.4	0	0.166667	0	-1.33333	-0.333333
614	STAN	5	0.5	-0.501784	-0.117943	-0.309339	-0.310388	0.360753	0.814271	0.821406	0.4	0	0.166667	0	0.666667	0.666667
614	STAN	2	0.5	-0.501784	-0.117943	-0.309339	-0.310388	0.360753	0.814271	0.821406	0.4	0	0.166667	0	0.666667	0.666667
678	STAN	5	0.5	-0.501784	-0.117943	-0.309339	-0.310388	0.360753	-0.185729	0.821406	0.666667	0	0.5	0	0	0
678	STAN	6	0.5	-0.501784	-0.117943	-0.309339	-0.310388	0.360753	-0.185729	0.821406	0.666667	0	0.5	0	-1	-1
678	STAN	5	0.5	-0.501784	-0.117943	-0.309339	-0.310388	0.360753	-0.185729	0.821406	-0.333333	0	-0.5	0	0	0
553	STAN	3	0.5	0.498216	-0.117943	0.690661	-0.310388	0.360753	-0.185729	-0.178594	0	0	0	0	0.666667	0
553	STAN	5	0.5	0.498216	-0.117943	0.690661	-0.310388	0.360753	-0.185729	-0.178594	0	0	0	0	0.666667	0
553	STAN	5	0.5	0.498216	-0.117943	0.690661	-0.310388	0.360753	-0.185729	-0.178594	0	0	0	0	-0.333333	0
473	STAN	7	0.5	0.498216	-0.117943	-0.309339	-0.310388	0.360753	-0.185729	-0.178594	0	0	-0.333333	-0.166667	1.5	1.33333
473	STAN	6	0.5	0.498216	-0.117943	-0.309339	-0.310388	0.360753	-0.185729	-0.178594	0	0	-0.333333	-0.166667	-1.5	-1.66667
473	STAN	7	0.5	0.498216	-0.117943	-0.309339	-0.310388	0.360753	-0.185729	-0.178594	0	0	-0.333333	-0.166667	-1.5	0.333333
434	STAN	2	0.5	0.498216	-0.117943	-0.309339	-0.310388	0.360753	0.814271	-0.178594	0.75	0	0.2	0	1.16667	0.833333
434	STAN	4	0.5	0.498216	-0.117943	-0.309339	-0.310388	0.360753	0.814271	-0.178594	NA	NA	NA	NA	0.166667	-0.166667
434	STAN	4	0.5	0.498216	-0.117943	-0.309339	-0.310388	0.360753	0.814271	-0.178594	-0.25	0	0.2	0	0.166667	-0.166667
646	STAN	3	0.5	0.498216	-0.117943	-0.309339	-0.310388	-0.639247	-0.185729	-0.178594	0	0.333333	0	0	0.5	1.16667
646	STAN	3	0.5	0.498216	-0.117943	-0.309339	-0.310388	-0.639247	-0.185729	-0.178594	0	0.333333	0	0	0.5	0.166667
646	STAN	3	0.5	0.498216	-0.117943	-0.309339	-0.310388	-0.639247	-0.185729	-0.178594	0	0.333333	0	0	-2.5	-2.83333
591	STAN	7	0.5	0.498216	-0.117943	-0.309339	-0.310388	0.360753	-0.185729	0.821406	0	0	-0.5	0	-0.166667	0.5
591	STAN	4	0.5	0.498216	-0.117943	-0.309339	-0.310388	0.360753	-0.185729	0.821406	0	0	-0.5	0	0.833333	0.5
591	STAN	6	0.5	0.498216	-0.117943	-0.309339	-0.310388	0.360753	-0.185729	0.821406	0	0	-0.5	0	-0.166667	-1.5
623	STAN	2	0.5	0.498216	-0.117943	-0.309339	-0.310388	0.360753	-0.185729	-0.178594	-0.166667	-0.166667	0	0	0.166667	0.333333
623	STAN	1	0.5	0.498216	-0.117943	-0.309339	-0.310388	0.360753	-0.185729	-0.178594	-0.166667	-0.166667	0	0	0.166667	0.333333
623	STAN	2	0.5	0.498216	-0.117943	-0.309339	-0.310388	0.360753	-0.185729	-0.178594	-0.166667	-0.166667	0	0	0.166667	0.333333
225	STAN	5	0.5	-0.501784	-0.117943	-0.309339	-0.310388	0.360753	-0.185729	0.821406	0.166667	-0.333333	-0.5	0	0.333333	0
225	STAN	5	0.5	-0.501784	-0.117943	-0.309339	-0.310388	0.360753	-0.185729	0.821406	0.166667	-0.333333	-0.5	0	0.333333	0
225	STAN	2	0.5	-0.501784	-0.117943	-0.309339	-0.310388	0.360753	-0.185729	0.821406	0.166667	-0.333333	0.5	0	0.333333	0
184	STAN	2	0.5	-0.501784	-0.117943	0.690661	0.689612	0.360753	-0.185729	-0.178594	0	0	0	0	-0.166667	-0.166667
184	STAN	4	0.5	-0.501784	-0.117943	0.690661	0.689612	0.360753	-0.185729	-0.178594	0	0	0	NA	-0.166667	-0.166667
184	STAN	2	0.5	-0.501784	-0.117943	0.690661	0.689612	0.360753	-0.185729	-0.178594	0	0	0	0	-0.166667	0.833333
670	STAN	5	0.5	-0.501784	-0.117943	-0.309339	-0.310388	0.360753	-0.185729	-0.178594	-0.4	-0.166667	0	0	0.333333	-0.166667
670	STAN	4	0.5	-0.501784	-0.117943	-0.309339	-0.310388	0.360753	-0.185729	-0.178594	-0.4	-0.166667	0	0	0.333333	-1.16667
670	STAN	5	0.5	-0.501784	-0.117943	-0.309339	-0.310388	0.360753	-0.185729	-0.178594	NA	-0.166667	0	NA	0.333333	-0.166667
644	STAN	4	0.5	-0.501784	-0.117943	-0.309339	-0.310388	0.360753	-0.185729	-0.178594	-0.4	0	0	0	0	0.4
644	STAN	3	0.5	-0.501784	-0.117943	-0.309339	-0.310388	0.360753	-0.185729	-0.178594	-0.4	0	0	0	1	NA
644	STAN	3	0.5	-0.501784	-0.117943	-0.309339	-0.310388	0.360753	-0.185729	-0.178594	0.6	0	0	0	0	0.4
703	STAN	4	0.5	0.498216	-0.117943	-0.309339	-0.310388	0.360753	-0.185729	-0.178594	0	0	0	0	0.166667	0.166667
703	STAN	4	0.5	0.498216	-0.117943	-0.309339	-0.310388	0.360753	-0.185729	-0.178594	0	0	0	0	0.166667	0.166667
703	STAN	2	0.5	0.498216	-0.117943	-0.309339	-0.310388	0.360753	-0.185729	-0.178594	0	0	0	0	0.166667	0.166667
459	STAN	7	0.5	-0.501784	-0.117943	-0.309339	-0.310388	-0.639247	-0.185729	-0.178594	0	0.166667	-0.4	-0.2	0.166667	0.333333
459	STAN	6	0.5	-0.501784	-0.117943	-0.309339	-0.310388	-0.639247	-0.185729	-0.178594	0	0.166667	-0.4	0.8	-0.833333	-1.66667
459	STAN	4	0.5	-0.501784	-0.117943	-0.309339	-0.310388	-0.639247	-0.185729	-0.178594	0	0.166667	NA	NA	-0.833333	0.333333
414	STAN	2	0.5	-0.501784	0.882057	0.690661	-0.310388	0.360753	-0.185729	-0.178594	0.166667	0	0	0	0.5	-0.166667
414	STAN	4	0.5	-0.501784	0.882057	0.690661	-0.310388	0.360753	-0.185729	-0.178594	0.166667	0	0	0	0.5	0.833333
414	STAN	4	0.5	-0.501784	0.882057	0.690661	-0.310388	0.360753	-0.185729	-0.178594	0.166667	0	0	0	-1.5	-0.166667
342	STAN	3	0.5	-0.501784	-0.117943	-0.309339	-0.310388	-0.639247	0.814271	-0.178594	0.333333	0.166667	0.166667	0	0.5	0.333333
342	STAN	4	0.5	-0.501784	-0.117943	-0.309339	-0.310388	-0.639247	0.814271	-0.178594	0.333333	0.166667	0.166667	0	0.5	0.333333
342	STAN	4	0.5	-0.501784	-0.117943	-0.309339	-0.310388	-0.639247	0.814271	-0.178594	0.333333	0.166667	0.166667	0	-1.5	0.333333
537	STAN	5	0.5	-0.501784	-0.117943	-0.309339	0.689612	0.360753	-0.185729	-0.178594	0.333333	-0.166667	0	0	0.5	-0.166667
537	STAN	4	0.5	-0.501784	-0.117943	-0.309339	0.689612	0.360753	-0.185729	-0.178594	0.333333	-0.166667	0	0	0.5	-0.166667
537	STAN	3	0.5	-0.501784	-0.117943	-0.309339	0.689612	0.360753	-0.185729	-0.178594	-0.666667	-0.166667	0	0	0.5	0.833333
176	STAN	6	0.5	-0.501784	-0.117943	-0.309339	-0.310388	0.360753	-0.185729	-0.178594	0.666667	0	0	-0.4	0.5	0.333333
176	STAN	6	0.5	-0.501784	-0.117943	-0.309339	-0.310388	0.360753	-0.185729	-0.178594	0.666667	0	0	0.6	0.5	0.333333
176	STAN	5	0.5	-0.501784	-0.117943	-0.309339	-0.310388	0.360753	-0.185729	-0.178594	-0.333333	0	0	0.6	0.5	0.333333
579	STAN	4	0.5	-0.501784	-0.117943	0.690661	-0.310388	0.360753	0.814271	-0.178594	-0.333333	0	-0.5	0	0.4	0.166667
579	STAN	3	0.5	-0.501784	-0.117943	0.690661	-0.310388	0.360753	0.814271	-0.178594	-0.333333	0	-0.5	0	0.4	0.166667
579	STAN	5	0.5	-0.501784	-0.117943	0.690661	-0.310388	0.360753	0.814271	-0.178594	0.666667	0	0.5	0	-1.6	0.166667
258	STAN	5	0.5	0.498216	-0.117943	0.690661	-0.310388	0.360753	-0.185729	-0.178594	0	0	NA	0	0.333333	1.16667
258	STAN	4	0.5	0.498216	-0.117943	0.690661	-0.310388	0.360753	-0.185729	-0.178594	0	0	0	0	-1.66667	-1.83333
258	STAN	3	0.5	0.498216	-0.117943	0.690661	-0.310388	0.360753	-0.185729	-0.178594	0	0	0	0	0.333333	0.166667
399	STAN	3	0.5	0.498216	-0.117943	0.690661	-0.310388	-0.639247	-0.185729	-0.178594	0	0.5	-0.166667	0	1.66667	0.333333
399	STAN	2	0.5	0.498216	-0.117943	0.690661	-0.310388	-0.639247	-0.185729	-0.178594	0	0.5	-0.166667	0	0.666667	0.333333
399	STAN	4	0.5	0.498216	-0.117943	0.690661	-0.310388	-0.639247	-0.185729	-0.178594	0	-0.5	0.833333	0	-0.333333	-0.666667
755	STAN	3	0.5	0.498216	-0.117943	0.690661	-0.310388	0.360753	-0.185729	-0.178594	0	0	0	0	-0.833333	0.166667
755	STAN	4	0.5	0.498216	-0.117943	0.690661	-0.310388	0.360753	-0.185729	-0.178594	0	0	0	0	-1.83333	0.166667
755	STAN	2	0.5	0.498216	-0.117943	0.690661	-0.310388	0.360753	-0.185729	-0.178594	0	0	NA	0	0.166667	1.16667
147	STAN	3	0.5	0.498216	-0.117943	0.690661	-0.310388	0.360753	-0.185729	-0.178594	0	0	0	0	0	-0.166667
147	STAN	2	0.5	0.498216	-0.117943	0.690661	-0.310388	0.360753	-0.185729	-0.178594	0	0	0	0	1	-0.166667
147	STAN	2	0.5	0.498216	-0.117943	0.690661	-0.310388	0.360753	-0.185729	-0.178594	0	0	0	0	0	-0.166667
731	STAN	4	0.5	0.498216	-0.117943	0.690661	-0.310388	0.360753	-0.185729	-0.178594	0.833333	-0.166667	-0.333333	-0.166667	0.166667	-0.166667
731	STAN	5	0.5	0.498216	-0.117943	0.690661	-0.310388	0.360753	-0.185729	-0.178594	-0.166667	-0.166667	-0.333333	-0.166667	0.166667	-0.166667
731	STAN	6	0.5	0.498216	-0.117943	0.690661	-0.310388	0.360753	-0.185729	-0.178594	-0.166667	-0.166667	0.666667	0.833333	-1.83333	-0.166667
265	STAN	2	0.5	0.498216	-0.117943	0.690661	-0.310388	-0.639247	-0.185729	0.821406	0	0.6	-0.166667	0	0.166667	1.16667
265	STAN	2	0.5	0.498216	-0.117943	0.690661	-0.310388	-0.639247	-0.185729	0.821406	0	0.6	-0.166667	0	0.166667	0.166667
265	STAN	2	0.5	0.498216	-0.117943	0.690661	-0.310388	-0.639247	-0.185729	0.821406	0	-0.4	-0.166667	0	0.166667	0.166667
570	STAN	4	0.5	-0.501784	-0.117943	0.690661	0.689612	-0.639247	-0.185729	-0.178594	-0.666667	0.166667	0	0	0.666667	0.5
570	STAN	4	0.5	-0.501784	-0.117943	0.690661	0.689612	-0.639247	-0.185729	-0.178594	0.333333	0.166667	0	0	-0.333333	-0.5
570	STAN	4	0.5	-0.501784	-0.117943	0.690661	0.689612	-0.639247	-0.185729	-0.178594	-0.666667	0.166667	0	0	-0.333333	0.5
708	STAN	3	0.5	-0.501784	-0.117943	-0.309339	0.689612	-0.639247	-0.185729	-0.178594	0	0.333333	0	0	0.166667	-0.5
708	STAN	2	0.5	-0.501784	-0.117943	-0.309339	0.689612	-0.639247	-0.185729	-0.178594	0	0.333333	0	0	0.166667	0.5
708	STAN	1	0.5	-0.501784	-0.117943	-0.309339	0.689612	-0.639247	-0.185729	-0.178594	0	0.333333	0	0	0.166667	0.5
702	STAN	4	0.5	0.498216	-0.117943	-0.309339	0.689612	0.360753	-0.185729	-0.178594	0	0.6	-0.166667	0	-1.5	0.333333
702	STAN	5	0.5	0.498216	-0.117943	-0.309339	0.689612	0.360753	-0.185729	-0.178594	0	0.6	0.833333	0	0.5	0.333333
702	STAN	6	0.5	0.498216	-0.117943	-0.309339	0.689612	0.360753	-0.185729	-0.178594	0	-0.4	-0.166667	0	0.5	0.333333
760	STAN	4	0.5	0.498216	0.882057	-0.309339	-0.310388	0.360753	-0.185729	-0.178594	0	0	0	0	0.333333	0.166667
760	STAN	2	0.5	0.498216	0.882057	-0.309339	-0.310388	0.360753	-0.185729	-0.178594	0	0	0	0	0.333333	0.166667
760	STAN	2	0.5	0.498216	0.882057	-0.309339	-0.310388	0.360753	-0.185729	-0.178594	0	0	0	0	0.333333	-0.833333
377	STAN	2	0.5	0.498216	-0.117943	0.690661	0.689612	0.360753	-0.185729	-0.178594	0	0	0.666667	0	-0.166667	0
377	STAN	5	0.5	0.498216	-0.117943	0.690661	0.689612	0.360753	-0.185729	-0.178594	0	0	0.666667	0	-1.16667	0
377	STAN	5	0.5	0.498216	-0.117943	0.690661	0.689612	0.360753	-0.185729	-0.178594	0	0	-0.333333	0	-1.16667	-1
751	STAN	5	0.5	0.498216	-0.117943	0.690661	-0.310388	0.360753	0.814271	0.821406	0	-0.166667	-0.5	-0.333333	0.166667	0.166667
751	STAN	2	0.5	0.498216	-0.117943	0.690661	-0.310388	0.360753	0.814271	0.821406	0	-0.166667	-0.5	-0.333333	1.16667	1.16667
751	STAN	5	0.5	0.498216	-0.117943	0.690661	-0.310388	0.360753	0.814271	0.821406	0	0.833333	0.5	-0.333333	0.166667	0.166667
470	STAN	3	0.5	-0.501784	-0.117943	-0.309339	-0.310388	0.360753	-0.185729	-0.178594	0.5	0	0	0	0.2	0.166667
470	STAN	1	0.5	-0.501784	-0.117943	-0.309339	-0.310388	0.360753	-0.185729	-0.178594	-0.5	0	0	0	0.2	0.166667
470	STAN	3	0.5	-0.501784	-0.117943	-0.309339	-0.310388	0.360753	-0.185729	-0.178594	0.5	0	0	0	1.2	1.16667
619	STAN	2	0.5	-0.501784	-0.117943	-0.309339	0.689612	0.360753	-0.185729	-0.178594	-0.166667	0	-0.166667	0	0.833333	0.6
619	STAN	3	0.5	-0.501784	-0.117943	-0.309339	0.689612	0.360753	-0.185729	-0.178594	-0.166667	0	-0.166667	0	-0.166667	-0.4
619	STAN	4	0.5	-0.501784	-0.117943	-0.309339	0.689612	0.360753	-0.185729	-0.178594	-0.166667	0	-0.166667	0	-0.166667	NA
307	STAN	5	0.5	0.498216	-0.117943	-0.309339	-0.310388	0.360753	-0.185729	-0.178594	0	-0.166667	-0.166667	0	0.5	-0.2
307	STAN	8	0.5	0.498216	-0.117943	-0.309339	-0.310388	0.360753	-0.185729	-0.178594	0	-0.166667	-0.166667	0	0.5	0.8
307	STAN	6	0.5	0.498216	-0.117943	-0.309339	-0.310388	0.360753	-0.185729	-0.178594	0	-0.166667	-0.166667	0	0.5	NA
565	STAN	6	0.5	0.498216	-0.117943	0.690661	-0.310388	0.360753	0.814271	-0.178594	-0.166667	-0.166667	0.666667	0	-1.33333	-1.83333
565	STAN	5	0.5	0.498216	-0.117943	0.690661	-0.310388	0.360753	0.814271	-0.178594	-0.166667	-0.166667	-0.333333	0	-1.33333	-1.83333
565	STAN	2	0.5	0.498216	-0.117943	0.690661	-0.310388	0.360753	0.814271	-0.178594	0.833333	-0.166667	0.666667	0	1.66667	1.16667
333	STAN	1	0.5	0.498216	-0.117943	-0.309339	0.689612	0.360753	-0.185729	-0.178594	0	0	0	-0.166667	1.16667	1.5
333	STAN	2	0.5	0.498216	-0.117943	-0.309339	0.689612	0.360753	-0.185729	-0.178594	0	0	0	-0.166667	0.166667	0.5
333	STAN	3	0.5	0.498216	-0.117943	-0.309339	0.689612	0.360753	-0.185729	-0.178594	0	0	0	-0.166667	1.16667	1.5
390	STAN	3	0.5	0.498216	0.882057	-0.309339	-0.310388	0.360753	-0.185729	-0.178594	0	0	-0.166667	0	0.666667	0
390	STAN	2	0.5	0.498216	0.882057	-0.309339	-0.310388	0.360753	-0.185729	-0.178594	0	0	-0.166667	0	1.66667	1
390	STAN	2	0.5	0.498216	0.882057	-0.309339	-0.310388	0.360753	-0.185729	-0.178594	0	0	-0.166667	0	0.666667	0
362	STAN	2	0.5	0.498216	-0.117943	-0.309339	-0.310388	0.360753	-0.185729	-0.178594	0	0	0	0	0.833333	1.16667
362	STAN	2	0.5	0.498216	-0.117943	-0.309339	-0.310388	0.360753	-0.185729	-0.178594	0	0	0	0	0.833333	1.16667
362	STAN	5	0.5	0.498216	-0.117943	-0.309339	-0.310388	0.360753	-0.185729	-0.178594	0	0	0	0	-1.16667	-0.833333
443	STAN	2	0.5	-0.501784	-0.117943	-0.309339	-0.310388	0.360753	-0.185729	-0.178594	0.8	0	0	0	1.16667	1.16667
443	STAN	4	0.5	-0.501784	-0.117943	-0.309339	-0.310388	0.360753	-0.185729	-0.178594	-0.2	0	0	0	0.166667	0.166667
443	STAN	4	0.5	-0.501784	-0.117943	-0.309339	-0.310388	0.360753	-0.185729	-0.178594	-0.2	0	0	0	0.166667	0.166667
181	STAN	9	0.5	-0.501784	-0.117943	-0.309339	0.689612	NA	0.814271	0.821406	-0.166667	0.333333	0.333333	0	0.333333	1.16667
181	STAN	9	0.5	-0.501784	-0.117943	-0.309339	0.689612	NA	0.814271	0.821406	-0.166667	0.333333	0.333333	0	-0.666667	-0.833333
181	STAN	8	0.5	-0.501784	-0.117943	-0.309339	0.689612	NA	0.814271	0.821406	0.833333	0.333333	-0.666667	0	0.333333	1.16667
300	STAN	3	0.5	-0.501784	-0.117943	-0.309339	0.689612	-0.639247	-0.185729	-0.178594	-0.5	0.333333	0	0	-0.166667	0
300	STAN	8	0.5	-0.501784	-0.117943	-0.309339	0.689612	-0.639247	-0.185729	-0.178594	0.5	0.333333	0	0	-0.166667	0
300	STAN	4	0.5	-0.501784	-0.117943	-0.309339	0.689612	-0.639247	-0.185729	-0.178594	0.5	0.333333	0	0	-0.166667	0
695	STAN	1	0.5	0.498216	-0.117943	-0.309339	0.689612	-0.639247	-0.185729	-0.178594	0	0	-0.333333	0	0.5	0.666667
695	STAN	5	0.5	0.498216	-0.117943	-0.309339	0.689612	-0.639247	-0.185729	-0.178594	0	0	-0.333333	0	0.5	-0.333333
695	STAN	2	0.5	0.498216	-0.117943	-0.309339	0.689612	-0.639247	-0.185729	-0.178594	0	0	-0.333333	0	0.5	0.666667
800	STAN	3	0.5	-0.501784	-0.117943	0.690661	0.689612	0.360753	-0.185729	-0.178594	0.4	-0.166667	0	0	1	1
800	STAN	4	0.5	-0.501784	-0.117943	0.690661	0.689612	0.360753	-0.185729	-0.178594	-0.6	-0.166667	0	0	0	1
800	STAN	4	0.5	-0.501784	-0.117943	0.690661	0.689612	0.360753	-0.185729	-0.178594	NA	-0.166667	NA	NA	-2	0
251	STAN	3	0.5	-0.501784	-0.117943	0.690661	0.689612	-0.639247	0.814271	-0.178594	0	0.5	0.333333	0	0.5	0.5
251	STAN	4	0.5	-0.501784	-0.117943	0.690661	0.689612	-0.639247	0.814271	-0.178594	NA	0.5	0.333333	0	0.5	-0.5
251	STAN	6	0.5	-0.501784	-0.117943	0.690661	0.689612	-0.639247	0.814271	-0.178594	0	0.5	0.333333	0	-0.5	-1.5
630	STAN	3	0.4	0.498216	-0.117943	-0.309339	-0.310388	0.360753	-0.185729	-0.178594	0	-0.2	0	NA	-0.8	-0.4
630	STAN	4	0.4	0.498216	-0.117943	-0.309339	-0.310388	0.360753	-0.185729	-0.178594	0	-0.2	0	0	-1.8	-0.4
630	STAN	2	0.4	0.498216	-0.117943	-0.309339	-0.310388	0.360753	-0.185729	-0.178594	0	-0.2	0	0	1.2	0.6
421	STAN	2	0.5	0.498216	-0.117943	-0.309339	-0.310388	-0.639247	-0.185729	-0.178594	0	0.166667	0	0	0.666667	0.5
421	STAN	4	0.5	0.498216	-0.117943	-0.309339	-0.310388	-0.639247	-0.185729	-0.178594	0	0.166667	0	0	-0.333333	-0.5
421	STAN	2	0.5	0.498216	-0.117943	-0.309339	-0.310388	-0.639247	-0.185729	-0.178594	0	0.166667	0	0	-0.333333	0.5
356	STAN	2	0.5	0.498216	-0.117943	-0.309339	-0.310388	0.360753	-0.185729	-0.178594	0	0	0	0	0.666667	0.5
356	STAN	5	0.5	0.498216	-0.117943	-0.309339	-0.310388	0.360753	-0.185729	-0.178594	0	0	0	0	-1.33333	-1.5
356	STAN	6	0.5	0.498216	-0.117943	-0.309339	-0.310388	0.360753	-0.185729	-0.178594	0	0	0	0	-1.33333	-1.5
313	STAN	6	0.5	0.498216	-0.117943	-0.309339	0.689612	0.360753	0.814271	-0.178594	0	-0.166667	-0.166667	0	-0.5	-0.333333
313	STAN	4	0.5	0.498216	-0.117943	-0.309339	0.689612	0.360753	0.814271	-0.178594	0	-0.166667	0.833333	0	0.5	0.666667
313	STAN	1	0.5	0.498216	-0.117943	-0.309339	0.689612	0.360753	0.814271	-0.178594	0	-0.166667	-0.166667	0	0.5	0.666667
582	STAN	2	0.5	0.498216	-0.117943	-0.309339	-0.310388	-0.639247	-0.185729	-0.178594	0	0.166667	0	0	0	0.166667
582	STAN	1	0.5	0.498216	-0.117943	-0.309339	-0.310388	-0.639247	-0.185729	-0.178594	0	0.166667	0	0	1	1.16667
582	STAN	4	0.5	0.498216	-0.117943	-0.309339	-0.310388	-0.639247	-0.185729	-0.178594	0	0.166667	0	0	-2	0.166667
657	STAN	3	0.5	0.498216	-0.117943	-0.309339	-0.310388	0.360753	-0.185729	-0.178594	0	0	0	0	0.833333	0
657	STAN	6	0.5	0.498216	-0.117943	-0.309339	-0.310388	0.360753	-0.185729	-0.178594	0	0	0	0	-2.16667	-2
657	STAN	2	0.5	0.498216	-0.117943	-0.309339	-0.310388	0.360753	-0.185729	-0.178594	0	0	0	0	-0.166667	0
543	STAN	5	0.5	0.498216	-0.117943	0.690661	-0.310388	0.360753	-0.185729	-0.178594	0	-0.166667	0	0	-0.166667	1
543	STAN	3	0.5	0.498216	-0.117943	0.690661	-0.310388	0.360753	-0.185729	-0.178594	0	-0.166667	0	0	0.833333	1
543	STAN	4	0.5	0.498216	-0.117943	0.690661	-0.310388	0.360753	-0.185729	-0.178594	0	-0.166667	0	0	-0.166667	0
632	STAN	2	0.6	-0.501784	-0.117943	-0.309339	0.689612	0.360753	-0.185729	-0.178594	-0.4	-0.6	0.6	0	1	0.2
632	STAN	5	0.6	-0.501784	-0.117943	-0.309339	0.689612	0.360753	-0.185729	-0.178594	0.6	-0.6	0.6	0	-1	0.2
140	STAN	3	0.5	-0.501784	0.882057	0.690661	-0.310388	0.360753	-0.185729	-0.178594	0.666667	0	0	0	0	-0.166667
140	STAN	5	0.5	-0.501784	0.882057	0.690661	-0.310388	0.360753	-0.185729	-0.178594	0.666667	0	0	0	0	-0.166667
140	STAN	5	0.5	-0.501784	0.882057	0.690661	-0.310388	0.360753	-0.185729	-0.178594	-0.333333	0	0	0	0	-0.166667
329	STAN	3	0.5	0.498216	-0.117943	-0.309339	-0.310388	0.360753	-0.185729	-0.178594	0	0	0	0	1	1.16667
329	STAN	5	0.5	0.498216	-0.117943	-0.309339	-0.310388	0.360753	-0.185729	-0.178594	0	0	0	0	0	0.166667
329	STAN	5	0.5	0.498216	-0.117943	-0.309339	-0.310388	0.360753	-0.185729	-0.178594	NA	0	0	0	-2	-1.83333
613	STAN	2	0.5	0.498216	-0.117943	-0.309339	-0.310388	0.360753	-0.185729	0.821406	0	0	-0.5	0	1.5	0.5
613	STAN	6	0.5	0.498216	-0.117943	-0.309339	-0.310388	0.360753	-0.185729	0.821406	0	0	0.5	0	0.5	-0.5
613	STAN	4	0.5	0.498216	-0.117943	-0.309339	-0.310388	0.360753	-0.185729	0.821406	0	0	0.5	0	0.5	0.5
461	STAN	4	0.5	-0.501784	-0.117943	-0.309339	0.689612	-0.639247	-0.185729	-0.178594	0.4	0.5	-0.166667	0	-0.333333	0.333333
461	STAN	4	0.5	-0.501784	-0.117943	-0.309339	0.689612	-0.639247	-0.185729	-0.178594	NA	0.5	-0.166667	0	-0.333333	0.333333
461	STAN	7	0.5	-0.501784	-0.117943	-0.309339	0.689612	-0.639247	-0.185729	-0.178594	0.4	0.5	-0.166667	0	0.666667	0.333333
605	STAN	3	0.5	-0.501784	-0.117943	-0.309339	0.689612	-0.639247	-0.185729	0.821406	-0.166667	0.166667	-0.166667	0	0.833333	1.16667
605	STAN	1	0.5	-0.501784	-0.117943	-0.309339	0.689612	-0.639247	-0.185729	0.821406	-0.166667	0.166667	0.833333	0	0.833333	1.16667
605	STAN	5	0.5	-0.501784	-0.117943	-0.309339	0.689612	-0.639247	-0.185729	0.821406	-0.166667	0.166667	-0.166667	0	-0.166667	0.166667
105	STAN	9	0.5	0.498216	-0.117943	-0.309339	-0.310388	0.360753	-0.185729	-0.178594	0	0	-0.166667	0	-2.33333	-1.66667
105	STAN	2	0.5	0.498216	-0.117943	-0.309339	-0.310388	0.360753	-0.185729	-0.178594	NA	0	-0.166667	0	1.66667	1.33333
105	STAN	4	0.5	0.498216	-0.117943	-0.309339	-0.310388	0.360753	-0.185729	-0.178594	0	0	-0.166667	0	0.666667	-1.66667
683	STAN	5	0.5	-0.501784	-0.117943	-0.309339	0.689612	-0.639247	-0.185729	-0.178594	-0.333333	0.5	0	0	-0.6	-0.5
683	STAN	5	0.5	-0.501784	-0.117943	-0.309339	0.689612	-0.639247	-0.185729	-0.178594	0.666667	0.5	0	0	2.4	1.5
683	STAN	4	0.5	-0.501784	-0.117943	-0.309339	0.689612	-0.639247	-0.185729	-0.178594	-0.333333	0.5	0	0	NA	0.5
478	STAN	7	0.5	0.498216	-0.117943	-0.309339	0.689612	0.360753	-0.185729	0.821406	0	-0.333333	0	-0.166667	-0.5	-0.833333
478	STAN	6	0.5	0.498216	-0.117943	-0.309339	0.689612	0.360753	-0.185729	0.821406	0	-0.333333	0	-0.166667	-1.5	0.166667
478	STAN	3	0.5	0.498216	-0.117943	-0.309339	0.689612	0.360753	-0.185729	0.821406	0	-0.333333	NA	-0.166667	0.5	0.166667
169	STAN	2	0.5	0.498216	-0.117943	0.690661	-0.310388	0.360753	-0.185729	-0.178594	0	0	-0.166667	0	0.5	0.5
169	STAN	2	0.5	0.498216	-0.117943	0.690661	-0.310388	0.360753	-0.185729	-0.178594	0	0	-0.166667	0	1.5	1.5
169	STAN	2	0.5	0.498216	-0.117943	0.690661	-0.310388	0.360753	-0.185729	-0.178594	0	0	-0.166667	0	0.5	1.5
210	STAN	5	0.5	-0.501784	-0.117943	-0.309339	0.689612	-0.639247	0.814271	-0.178594	0.166667	0.333333	0	0	-0.833333	-0.5
210	STAN	5	0.5	-0.501784	-0.117943	-0.309339	0.689612	-0.639247	0.814271	-0.178594	0.166667	0.333333	0	0	1.16667	0.5
210	STAN	4	0.5	-0.501784	-0.117943	-0.309339	0.689612	-0.639247	0.814271	-0.178594	0.166667	0.333333	0	0	0.166667	0.5
625	STAN	7	0.5	0.498216	-0.117943	-0.309339	-0.310388	0.360753	-0.185729	-0.178594	0	0	-0.333333	0	0.333333	0.5
625	STAN	4	0.5	0.498216	-0.117943	-0.309339	-0.310388	0.360753	-0.185729	-0.178594	0	0	-0.333333	0	0.333333	-0.5
625	STAN	6	0.5	0.498216	-0.117943	-0.309339	-0.310388	0.360753	-0.185729	-0.178594	0	0	0.666667	0	-1.66667	-1.5
85	STAN	2	0.5	0.498216	-0.117943	-0.309339	-0.310388	-0.639247	-0.185729	-0.178594	0	0.166667	0.833333	0	-0.166667	-0.166667
85	STAN	3	0.5	0.498216	-0.117943	-0.309339	-0.310388	-0.639247	-0.185729	-0.178594	0	0.166667	-0.166667	0	-0.166667	-0.166667
85	STAN	4	0.5	0.498216	-0.117943	-0.309339	-0.310388	-0.639247	-0.185729	-0.178594	0	0.166667	-0.166667	0	-0.166667	-0.166667
504	STAN	3	0.5	0.498216	-0.117943	-0.309339	-0.310388	0.360753	-0.185729	-0.178594	0.8	-0.2	NA	0	1.33333	1.16667
504	STAN	3	0.5	0.498216	-0.117943	-0.309339	-0.310388	0.360753	-0.185729	-0.178594	-0.2	-0.2	0	0	0.333333	0.166667
504	STAN	5	0.5	0.498216	-0.117943	-0.309339	-0.310388	0.360753	-0.185729	-0.178594	NA	NA	0	NA	-1.66667	-0.833333
474	STAN	5	0.5	-0.501784	-0.117943	-0.309339	0.689612	-0.639247	-0.185729	-0.178594	-0.166667	0	0.833333	0	-1	-1.16667
474	STAN	4	0.5	-0.501784	-0.117943	-0.309339	0.689612	-0.639247	-0.185729	-0.178594	-0.166667	0	-0.166667	0	0	-0.166667
474	STAN	5	0.5	-0.501784	-0.117943	-0.309339	0.689612	-0.639247	-0.185729	-0.178594	0.833333	0	-0.166667	0	0	-0.166667
645	STAN	2	0.5	0.498216	-0.117943	-0.309339	-0.310388	0.360753	-0.185729	-0.178594	0	0	-0.2	0	1.6	1
645	STAN	4	0.5	0.498216	-0.117943	-0.309339	-0.310388	0.360753	-0.185729	-0.178594	0	0	-0.2	0	0.6	0
645	STAN	5	0.5	0.498216	-0.117943	-0.309339	-0.310388	0.360753	-0.185729	-0.178594	0	0	-0.2	0	0.6	0
519	STAN	3	0.5	-0.501784	-0.117943	-0.309339	-0.310388	0.360753	0.814271	-0.178594	-0.2	0	-0.333333	0	1	0.833333
519	STAN	2	0.5	-0.501784	-0.117943	-0.309339	-0.310388	0.360753	0.814271	-0.178594	0.8	0	-0.333333	0	0	-0.166667
519	STAN	3	0.5	-0.501784	-0.117943	-0.309339	-0.310388	0.360753	0.814271	-0.178594	-0.2	0	-0.333333	0	1	-0.166667
642	STAN	6	0.5	-0.501784	-0.117943	-0.309339	-0.310388	0.360753	0.814271	-0.178594	0.666667	0	-0.166667	0	-1	0.166667
642	STAN	6	0.5	-0.501784	-0.117943	-0.309339	-0.310388	0.360753	0.814271	-0.178594	0.666667	0	-0.166667	0	-2	-0.833333
642	STAN	5	0.5	-0.501784	-0.117943	-0.309339	-0.310388	0.360753	0.814271	-0.178594	-0.333333	0	0.833333	0	-1	0.166667
753	STAN	5	0.5	-0.501784	-0.117943	0.690661	-0.310388	0.360753	-0.185729	-0.178594	0	0	0	0	1.33333	0.833333
753	STAN	4	0.5	-0.501784	-0.117943	0.690661	-0.310388	0.360753	-0.185729	-0.178594	0	0	0	0	-1.66667	-1.16667
753	STAN	3	0.5	-0.501784	-0.117943	0.690661	-0.310388	0.360753	-0.185729	-0.178594	0	0	0	0	1.33333	0.833333
320	STAN	7	0.5	-0.501784	-0.117943	-0.309339	-0.310388	0.360753	-0.185729	-0.178594	-0.333333	0	0	0.833333	-0.833333	0.333333
320	STAN	4	0.5	-0.501784	-0.117943	-0.309339	-0.310388	0.360753	-0.185729	-0.178594	0.666667	0	NA	-0.166667	0.166667	0.333333
320	STAN	7	0.5	-0.501784	-0.117943	-0.309339	-0.310388	0.360753	-0.185729	-0.178594	-0.333333	0	0	-0.166667	1.16667	0.333333
244	STAN	7	0.5	0.498216	0.882057	-0.309339	-0.310388	0.360753	-0.185729	-0.178594	0	0	0	0	0.166667	0.333333
244	STAN	2	0.5	0.498216	0.882057	-0.309339	-0.310388	0.360753	-0.185729	-0.178594	0	0	0	0	0.166667	0.333333
244	STAN	4	0.5	0.498216	0.882057	-0.309339	-0.310388	0.360753	-0.185729	-0.178594	0	0	0	0	0.166667	0.333333
299	STAN	5	0.5	0.498216	-0.117943	0.690661	0.689612	0.360753	-0.185729	0.821406	0	0	-0.166667	0.666667	-0.5	0.4
299	STAN	3	0.5	0.498216	-0.117943	0.690661	0.689612	0.360753	-0.185729	0.821406	0	0	-0.166667	-0.333333	0.5	0.4
299	STAN	2	0.5	0.498216	-0.117943	0.690661	0.689612	0.360753	-0.185729	0.821406	0	0	-0.166667	-0.333333	0.5	-0.6
391	STAN	2	0.5	0.498216	-0.117943	0.690661	-0.310388	0.360753	0.814271	0.821406	0	0	-0.666667	0	0.333333	0
391	STAN	3	0.5	0.498216	-0.117943	0.690661	-0.310388	0.360753	0.814271	0.821406	0	0	0.333333	0	0.333333	0
391	STAN	4	0.5	0.498216	-0.117943	0.690661	-0.310388	0.360753	0.814271	0.821406	NA	0	0.333333	0	0.333333	0
797	STAN	5	0.5	-0.501784	-0.117943	-0.309339	0.689612	0.360753	-0.185729	-0.178594	-0.333333	-0.166667	0	0	0.2	1.16667
797	STAN	5	0.5	-0.501784	-0.117943	-0.309339	0.689612	0.360753	-0.185729	-0.178594	-0.333333	-0.166667	0	0	NA	-0.833333
797	STAN	2	0.5	-0.501784	-0.117943	-0.309339	0.689612	0.360753	-0.185729	-0.178594	0.666667	-0.166667	0	0	1.2	1.16667
588	STAN	5	0.5	0.498216	-0.117943	-0.309339	-0.310388	0.360753	-0.185729	-0.178594	0	0	0	0	-0.5	-0.333333
588	STAN	4	0.5	0.498216	-0.117943	-0.309339	-0.310388	0.360753	-0.185729	-0.178594	0	0	0	0	0.5	0.666667
588	STAN	3	0.5	0.498216	-0.117943	-0.309339	-0.310388	0.360753	-0.185729	-0.178594	0	0	0	0	0.5	-0.333333
409	STAN	2	0.5	-0.501784	-0.117943	0.690661	0.689612	-0.639247	-0.185729	-0.178594	0.8	0.2	-0.2	0	1.6	1.4
409	STAN	2	0.5	-0.501784	-0.117943	0.690661	0.689612	-0.639247	-0.185729	-0.178594	-0.2	0.2	-0.2	0	0.6	0.4
409	STAN	3	0.5	-0.501784	-0.117943	0.690661	0.689612	-0.639247	-0.185729	-0.178594	-0.2	-0.8	-0.2	0	0.6	0.4
336	STAN	7	0.5	-0.501784	-0.117943	-0.309339	-0.310388	0.360753	-0.185729	-0.178594	0.4	0	-0.333333	0	-1.83333	-0.333333
336	STAN	4	0.5	-0.501784	-0.117943	-0.309339	-0.310388	0.360753	-0.185729	-0.178594	0.4	0	0.666667	0	0.166667	-0.333333
336	STAN	2	0.5	-0.501784	-0.117943	-0.309339	-0.310388	0.360753	-0.185729	-0.178594	0.4	0	0.666667	0	0.166667	-0.333333
739	STAN	4	0.5	-0.501784	0.882057	-0.309339	0.689612	-0.639247	-0.185729	0.821406	0.166667	0.166667	0	0	-0.8	-0.6
739	STAN	4	0.5	-0.501784	0.882057	-0.309339	0.689612	-0.639247	-0.185729	0.821406	0.166667	0.166667	0	0	0.2	0.4
739	STAN	3	0.5	-0.501784	0.882057	-0.309339	0.689612	-0.639247	-0.185729	0.821406	0.166667	0.166667	0	0	NA	NA
240	STAN	5	0.6	-0.501784	-0.117943	0.690661	-0.310388	0.360753	-0.185729	-0.178594	0	-0.4	-0.4	0	1.4	-0.2
240	STAN	4	0.6	-0.501784	-0.117943	0.690661	-0.310388	0.360753	-0.185729	-0.178594	0	-0.4	-0.4	0	-0.6	-0.2
773	STAN	2	0.5	0.498216	-0.117943	0.690661	-0.310388	-0.639247	-0.185729	-0.178594	0	0.166667	-0.166667	0	0.166667	0.666667
773	STAN	2	0.5	0.498216	-0.117943	0.690661	-0.310388	-0.639247	-0.185729	-0.178594	0	0.166667	-0.166667	0	1.16667	0.666667
773	STAN	5	0.5	0.498216	-0.117943	0.690661	-0.310388	-0.639247	-0.185729	-0.178594	0	0.166667	-0.166667	0	0.166667	-0.333333
185	STAN	3	0.5	-0.501784	-0.117943	-0.309339	0.689612	-0.639247	-0.185729	-0.178594	-0.166667	0.5	0	-0.166667	1.16667	0.5
185	STAN	3	0.5	-0.501784	-0.117943	-0.309339	0.689612	-0.639247	-0.185729	-0.178594	0.833333	0.5	0	-0.166667	1.16667	0.5
185	STAN	5	0.5	-0.501784	-0.117943	-0.309339	0.689612	-0.639247	-0.185729	-0.178594	-0.166667	0.5	0	-0.166667	0.166667	1.5
716	STAN	4	0.5	0.498216	-0.117943	0.690661	-0.310388	0.360753	-0.185729	-0.178594	0	0	0	0	0	0
716	STAN	2	0.5	0.498216	-0.117943	0.690661	-0.310388	0.360753	-0.185729	-0.178594	0	0	0	0	0	0
716	STAN	2	0.5	0.498216	-0.117943	0.690661	-0.310388	0.360753	-0.185729	-0.178594	0	0	0	0	0	0
615	STAN	6	0.5	-0.501784	-0.117943	-0.309339	0.689612	0.360753	0.814271	-0.178594	0.166667	0	-0.166667	0	0.8	0.5
615	STAN	4	0.5	-0.501784	-0.117943	-0.309339	0.689612	0.360753	0.814271	-0.178594	0.166667	0	-0.166667	0	-1.2	-0.5
615	STAN	5	0.5	-0.501784	-0.117943	-0.309339	0.689612	0.360753	0.814271	-0.178594	0.166667	0	0.833333	0	0.8	0.5
639	STAN	4	0.5	0.498216	-0.117943	-0.309339	-0.310388	-0.639247	-0.185729	-0.178594	0	0.333333	0.833333	0	-1.83333	-1.5
639	STAN	4	0.5	0.498216	-0.117943	-0.309339	-0.310388	-0.639247	-0.185729	-0.178594	0	0.333333	-0.166667	0	0.166667	0.5
639	STAN	5	0.5	0.498216	-0.117943	-0.309339	-0.310388	-0.639247	-0.185729	-0.178594	0	0.333333	-0.166667	0	-0.833333	-1.5
162	STAN	4	0.5	0.498216	-0.117943	-0.309339	-0.310388	-0.639247	-0.185729	0.821406	0	0.333333	0	0	-1	NA
162	STAN	5	0.5	0.498216	-0.117943	-0.309339	-0.310388	-0.639247	-0.185729	0.821406	0	0.333333	0	0	1	0.2
162	STAN	4	0.5	0.498216	-0.117943	-0.309339	-0.310388	-0.639247	-0.185729	0.821406	0	0.333333	0	0	0	0.2
209	STAN	5	0.5	0.498216	-0.117943	-0.309339	-0.310388	0.360753	-0.185729	-0.178594	0	0	NA	0	-0.166667	0
209	STAN	3	0.5	0.498216	-0.117943	-0.309339	-0.310388	0.360753	-0.185729	-0.178594	0	0	0.8	0	-0.166667	0
209	STAN	4	0.5	0.498216	-0.117943	-0.309339	-0.310388	0.360753	-0.185729	-0.178594	0	0	-0.2	0	-0.166667	0
230	STAN	3	0.5	-0.501784	-0.117943	-0.309339	0.689612	0.360753	-0.185729	-0.178594	0	-0.333333	0	0	-0.5	0.166667
230	STAN	3	0.5	-0.501784	-0.117943	-0.309339	0.689612	0.360753	-0.185729	-0.178594	0	-0.333333	0	0	0.5	0.166667
230	STAN	6	0.5	-0.501784	-0.117943	-0.309339	0.689612	0.360753	-0.185729	-0.178594	0	-0.333333	0	0	0.5	0.166667
97	STAN	2	0.5	-0.501784	-0.117943	-0.309339	-0.310388	-0.639247	-0.185729	-0.178594	-0.166667	0.5	-0.166667	0	0.833333	1
97	STAN	7	0.5	-0.501784	-0.117943	-0.309339	-0.310388	-0.639247	-0.185729	-0.178594	-0.166667	0.5	-0.166667	0	-0.166667	-1
97	STAN	5	0.5	-0.501784	-0.117943	-0.309339	-0.310388	-0.639247	-0.185729	-0.178594	0.833333	0.5	-0.166667	0	-1.16667	-1
149	STAN	3	0.5	0.498216	0.882057	0.690661	-0.310388	0.360753	-0.185729	0.821406	0	0	0	0	0.333333	-0.2
149	STAN	5	0.5	0.498216	0.882057	0.690661	-0.310388	0.360753	-0.185729	0.821406	0	0	0	0	-0.666667	-0.2
149	STAN	4	0.5	0.498216	0.882057	0.690661	-0.310388	0.360753	-0.185729	0.821406	0	0	0	0	0.333333	0.8
112	STAN	3	0.5	-0.501784	-0.117943	-0.309339	0.689612	-0.639247	0.814271	-0.178594	0.5	0.166667	-0.166667	0	-0.166667	0
112	STAN	7	0.5	-0.501784	-0.117943	-0.309339	0.689612	-0.639247	0.814271	-0.178594	0.5	0.166667	-0.166667	0	-0.166667	-1
112	STAN	5	0.5	-0.501784	-0.117943	-0.309339	0.689612	-0.639247	0.814271	-0.178594	-0.5	0.166667	-0.166667	0	-0.166667	0
406	STAN	2	0.5	0.498216	-0.117943	-0.309339	-0.310388	0.360753	-0.185729	0.821406	0	0	-0.6	0	-1.33333	-0.833333
406	STAN	5	0.5	0.498216	-0.117943	-0.309339	-0.310388	0.360753	-0.185729	0.821406	0	0	0.4	0	-2.33333	0.166667
406	STAN	3	0.5	0.498216	-0.117943	-0.309339	-0.310388	0.360753	-0.185729	0.821406	0	0	NA	0	1.66667	1.16667
389	STAN	3	0.5	-0.501784	-0.117943	0.690661	-0.310388	0.360753	-0.185729	-0.178594	0.5	0	NA	NA	-1	-0.333333
389	STAN	1	0.5	-0.501784	-0.117943	0.690661	-0.310388	0.360753	-0.185729	-0.178594	0.5	0	-0.2	0	0	-0.333333
389	STAN	3	0.5	-0.501784	-0.117943	0.690661	-0.310388	0.360753	-0.185729	-0.178594	0.5	0	-0.2	0	1	0.666667
688	STAN	6	0.5	-0.501784	-0.117943	-0.309339	-0.310388	-0.639247	-0.185729	0.821406	-0.166667	-0.333333	0	0	-1.33333	-1.66667
688	STAN	3	0.5	-0.501784	-0.117943	-0.309339	-0.310388	-0.639247	-0.185729	0.821406	0.833333	0.666667	0	0	0.666667	0.333333
688	STAN	6	0.5	-0.501784	-0.117943	-0.309339	-0.310388	-0.639247	-0.185729	0.821406	-0.166667	0.666667	0	0	-1.33333	0.333333
253	STAN	4	0.5	0.498216	0.882057	-0.309339	-0.310388	-0.639247	-0.185729	-0.178594	0	0.333333	0	0	1.16667	0.166667
253	STAN	5	0.5	0.498216	0.882057	-0.309339	-0.310388	-0.639247	-0.185729	-0.178594	0	0.333333	0	0	0.166667	0.166667
253	STAN	3	0.5	0.498216	0.882057	-0.309339	-0.310388	-0.639247	-0.185729	-0.178594	0	0.333333	0	0	-0.833333	0.166667
282	STAN	4	0.5	0.498216	-0.117943	0.690661	-0.310388	0.360753	-0.185729	0.821406	0	0	0	0	-0.5	-0.5
282	STAN	7	0.5	0.498216	-0.117943	0.690661	-0.310388	0.360753	-0.185729	0.821406	0	0	0	0	0.5	0.5
282	STAN	6	0.5	0.498216	-0.117943	0.690661	-0.310388	0.360753	-0.185729	0.821406	0	0	0	0	0.5	1.5
179	STAN	7	0.5	-0.501784	-0.117943	-0.309339	-0.310388	0.360753	-0.185729	-0.178594	0	-0.166667	0.666667	0.833333	-1.6	-2.5
179	STAN	5	0.5	-0.501784	-0.117943	-0.309339	-0.310388	0.360753	-0.185729	-0.178594	0	-0.166667	-0.333333	-0.166667	-0.6	0.5
179	STAN	2	0.5	-0.501784	-0.117943	-0.309339	-0.310388	0.360753	-0.185729	-0.178594	0	-0.166667	0.666667	-0.166667	1.4	0.5
547	STAN	4	0.5	-0.501784	-0.117943	0.690661	-0.310388	-0.639247	-0.185729	-0.178594	-0.333333	0.166667	0.333333	0	0.333333	0.333333
547	STAN	2	0.5	-0.501784	-0.117943	0.690661	-0.310388	-0.639247	-0.185729	-0.178594	0.666667	0.166667	0.333333	0	0.333333	0.333333
547	STAN	2	0.5	-0.501784	-0.117943	0.690661	-0.310388	-0.639247	-0.185729	-0.178594	-0.333333	0.166667	0.333333	0	-0.666667	0.333333
177	STAN	4	0.5	-0.501784	-0.117943	0.690661	-0.310388	-0.639247	-0.185729	-0.178594	0.5	0.166667	0	0	0.166667	-0.166667
177	STAN	5	0.5	-0.501784	-0.117943	0.690661	-0.310388	-0.639247	-0.185729	-0.178594	-0.5	0.166667	0	0	1.16667	0.833333
177	STAN	6	0.5	-0.501784	-0.117943	0.690661	-0.310388	-0.639247	-0.185729	-0.178594	0.5	0.166667	0	0	0.166667	-0.166667
173	STAN	2	0.5	-0.501784	0.882057	0.690661	-0.310388	0.360753	-0.185729	0.821406	NA	0	0	-0.166667	0	0.833333
173	STAN	3	0.5	-0.501784	0.882057	0.690661	-0.310388	0.360753	-0.185729	0.821406	-0.4	0	0	0.833333	0	-0.166667
173	STAN	4	0.5	-0.501784	0.882057	0.690661	-0.310388	0.360753	-0.185729	0.821406	-0.4	0	0	-0.166667	0	-0.166667
790	STAN	5	0.5	-0.501784	-0.117943	-0.309339	0.689612	-0.639247	-0.185729	-0.178594	0.2	0	0.5	0	-1	0.166667
790	STAN	5	0.5	-0.501784	-0.117943	-0.309339	0.689612	-0.639247	-0.185729	-0.178594	NA	0	0.5	0	0	0.166667
790	STAN	3	0.5	-0.501784	-0.117943	-0.309339	0.689612	-0.639247	-0.185729	-0.178594	0.2	0	0.5	0	1	0.166667
410	STAN	4	0.5	0.498216	-0.117943	0.690661	-0.310388	0.360753	0.814271	-0.178594	0	-0.166667	-0.666667	0	0.333333	0
410	STAN	3	0.5	0.498216	-0.117943	0.690661	-0.310388	0.360753	0.814271	-0.178594	0	-0.166667	0.333333	0	0.333333	0
410	STAN	2	0.5	0.498216	-0.117943	0.690661	-0.310388	0.360753	0.814271	-0.178594	0	-0.166667	0.333333	0	0.333333	0
732	STAN	2	0.5	0.498216	0.882057	-0.309339	-0.310388	0.360753	-0.185729	-0.178594	0	0	0	0	0.166667	-0.333333
732	STAN	5	0.5	0.498216	0.882057	-0.309339	-0.310388	0.360753	-0.185729	-0.178594	0	0	0	0	-1.83333	-0.333333
732	STAN	2	0.5	0.498216	0.882057	-0.309339	-0.310388	0.360753	-0.185729	-0.178594	0	0	0	0	1.16667	0.666667
252	STAN	2	0.5	-0.501784	-0.117943	0.690661	0.689612	-0.639247	-0.185729	-0.178594	0.166667	0.333333	-0.333333	0	0.2	0.5
252	STAN	4	0.5	-0.501784	-0.117943	0.690661	0.689612	-0.639247	-0.185729	-0.178594	0.166667	0.333333	-0.333333	0	NA	0.5
252	STAN	3	0.5	-0.501784	-0.117943	0.690661	0.689612	-0.639247	-0.185729	-0.178594	0.166667	0.333333	-0.333333	0	0.2	0.5
155	STAN	7	0.5	-0.501784	-0.117943	-0.309339	-0.310388	0.360753	-0.185729	0.821406	0.5	0	-0.166667	0.666667	-1.6	-2.5
155	STAN	7	0.5	-0.501784	-0.117943	-0.309339	-0.310388	0.360753	-0.185729	0.821406	-0.5	0	-0.166667	0.666667	0.4	0.5
155	STAN	4	0.5	-0.501784	-0.117943	-0.309339	-0.310388	0.360753	-0.185729	0.821406	0.5	0	-0.166667	-0.333333	1.4	0.5
517	STAN	3	0.5	-0.501784	-0.117943	-0.309339	-0.310388	0.360753	0.814271	0.821406	NA	NA	NA	NA	NA	NA
517	STAN	8	0.5	-0.501784	-0.117943	-0.309339	-0.310388	0.360753	0.814271	0.821406	0	0	0	0.8	0.8	0.6
517	STAN	4	0.5	-0.501784	-0.117943	-0.309339	-0.310388	0.360753	0.814271	0.821406	0	0	0	-0.2	-1.2	-0.4
774	STAN	5	0.5	-0.501784	-0.117943	-0.309339	0.689612	-0.639247	-0.185729	0.821406	0.5	0.166667	NA	0	-1.33333	-1
774	STAN	4	0.5	-0.501784	-0.117943	-0.309339	0.689612	-0.639247	-0.185729	0.821406	0.5	0.166667	0	0	-1.33333	0
774	STAN	4	0.5	-0.501784	-0.117943	-0.309339	0.689612	-0.639247	-0.185729	0.821406	0.5	0.166667	0	0	0.666667	1
794	STAN	5	0.5	-0.501784	0.882057	-0.309339	0.689612	-0.639247	-0.185729	-0.178594	0	0.166667	0	0	0	-0.6
794	STAN	4	0.5	-0.501784	0.882057	-0.309339	0.689612	-0.639247	-0.185729	-0.178594	0	0.166667	0	0	0	0.4
794	STAN	4	0.5	-0.501784	0.882057	-0.309339	0.689612	-0.639247	-0.185729	-0.178594	0	0.166667	NA	0	NA	NA
610	STAN	5	0.5	0.498216	-0.117943	-0.309339	-0.310388	-0.639247	-0.185729	-0.178594	0	0.5	0	NA	0.666667	0.5
610	STAN	5	0.5	0.498216	-0.117943	-0.309339	-0.310388	-0.639247	-0.185729	-0.178594	0	-0.5	0	0	-2.33333	-2.5
610	STAN	4	0.5	0.498216	-0.117943	-0.309339	-0.310388	-0.639247	-0.185729	-0.178594	0	0.5	0	0	-0.333333	0.5
647	STAN	4	0.5	0.498216	-0.117943	-0.309339	0.689612	0.360753	-0.185729	0.821406	0	0	0	0	0.5	1
647	STAN	4	0.5	0.498216	-0.117943	-0.309339	0.689612	0.360753	-0.185729	0.821406	0	0	0	0	1.5	1
647	STAN	3	0.5	0.498216	-0.117943	-0.309339	0.689612	0.360753	-0.185729	0.821406	0	0	0	0	-0.5	1
408	STAN	2	0.5	0.498216	-0.117943	0.690661	0.689612	0.360753	0.814271	-0.178594	0	-0.333333	-0.5	0	1	0.833333
408	STAN	5	0.5	0.498216	-0.117943	0.690661	0.689612	0.360753	0.814271	-0.178594	0	-0.333333	0.5	0	0	-0.166667
408	STAN	4	0.5	0.498216	-0.117943	0.690661	0.689612	0.360753	0.814271	-0.178594	0	-0.333333	0.5	0	-1	-1.16667
501	STAN	4	0.5	0.498216	-0.117943	-0.309339	-0.310388	0.360753	-0.185729	-0.178594	0	0	0	0	-1.83333	-1.66667
501	STAN	6	0.5	0.498216	-0.117943	-0.309339	-0.310388	0.360753	-0.185729	-0.178594	0	0	0	0	0.166667	0.333333
501	STAN	3	0.5	0.498216	-0.117943	-0.309339	-0.310388	0.360753	-0.185729	-0.178594	0	0	0	0	0.166667	0.333333
306	STAN	4	0.5	-0.501784	-0.117943	-0.309339	0.689612	-0.639247	-0.185729	-0.178594	-0.166667	0.5	-0.5	0	-0.166667	-0.166667
306	STAN	4	0.5	-0.501784	-0.117943	-0.309339	0.689612	-0.639247	-0.185729	-0.178594	0.833333	0.5	0.5	0	0.833333	0.833333
306	STAN	2	0.5	-0.501784	-0.117943	-0.309339	0.689612	-0.639247	-0.185729	-0.178594	-0.166667	0.5	0.5	0	0.833333	0.833333
301	STAN	3	0.5	0.498216	-0.117943	-0.309339	0.689612	0.360753	-0.185729	0.821406	0	0	0	0	0.5	0
301	STAN	3	0.5	0.498216	-0.117943	-0.309339	0.689612	0.360753	-0.185729	0.821406	0	0	0	0	0.5	0
301	STAN	8	0.5	0.498216	-0.117943	-0.309339	0.689612	0.360753	-0.185729	0.821406	0	0	0	0	0.5	0
249	STAN	1	0.5	-0.501784	-0.117943	0.690661	0.689612	-0.639247	-0.185729	-0.178594	0.833333	0	0.333333	0	0.666667	0.666667
249	STAN	3	0.5	-0.501784	-0.117943	0.690661	0.689612	-0.639247	-0.185729	-0.178594	-0.166667	0	-0.666667	0	-0.333333	-0.333333
249	STAN	1	0.5	-0.501784	-0.117943	0.690661	0.689612	-0.639247	-0.185729	-0.178594	-0.166667	0	0.333333	0	-0.333333	-0.333333
218	STAN	2	0.5	0.498216	-0.117943	-0.309339	-0.310388	-0.639247	0.814271	-0.178594	0	0.166667	0.333333	0	1	1.16667
218	STAN	4	0.5	0.498216	-0.117943	-0.309339	-0.310388	-0.639247	0.814271	-0.178594	0	0.166667	0.333333	0	0	0.166667
218	STAN	3	0.5	0.498216	-0.117943	-0.309339	-0.310388	-0.639247	0.814271	-0.178594	0	0.166667	0.333333	0	0	0.166667
549	STAN	3	0.5	0.498216	0.882057	-0.309339	0.689612	0.360753	-0.185729	-0.178594	0	-0.333333	0	0	0.833333	0.6
549	STAN	2	0.5	0.498216	0.882057	-0.309339	0.689612	0.360753	-0.185729	-0.178594	0	-0.333333	0	0	0.833333	0.6
549	STAN	5	0.5	0.498216	0.882057	-0.309339	0.689612	0.360753	-0.185729	-0.178594	0	-0.333333	0	0	-1.16667	-0.4
151	STAN	5	0.5	0.498216	-0.117943	-0.309339	-0.310388	-0.639247	0.814271	0.821406	-0.166667	0.333333	0.166667	-0.333333	-1	-1.33333
151	STAN	5	0.5	0.498216	-0.117943	-0.309339	-0.310388	-0.639247	0.814271	0.821406	-0.166667	0.333333	0.166667	-0.333333	0	0.666667
151	STAN	5	0.5	0.498216	-0.117943	-0.309339	-0.310388	-0.639247	0.814271	0.821406	-0.166667	0.333333	0.166667	0.666667	0	-1.33333
312	STAN	5	0.5	0.498216	-0.117943	-0.309339	-0.310388	0.360753	-0.185729	-0.178594	0	0	0	0	-0.666667	-0.333333
312	STAN	3	0.5	0.498216	-0.117943	-0.309339	-0.310388	0.360753	-0.185729	-0.178594	0	0	0	0	0.333333	0.666667
312	STAN	3	0.5	0.498216	-0.117943	-0.309339	-0.310388	0.360753	-0.185729	-0.178594	0	0	0	0	0.333333	-0.333333
778	STAN	3	0.5	-0.501784	0.882057	0.690661	-0.310388	0.360753	-0.185729	-0.178594	0.333333	-0.166667	0	0	-1.33333	-0.166667
778	STAN	3	0.5	-0.501784	0.882057	0.690661	-0.310388	0.360753	-0.185729	-0.178594	0.333333	-0.166667	0	0	0.666667	0.833333
778	STAN	3	0.5	-0.501784	0.882057	0.690661	-0.310388	0.360753	-0.185729	-0.178594	-0.666667	-0.166667	0	0	0.666667	0.833333
310	STAN	5	0.5	0.498216	-0.117943	-0.309339	-0.310388	0.360753	-0.185729	0.821406	0	-0.166667	0	0.833333	0.8	-1.33333
310	STAN	3	0.5	0.498216	-0.117943	-0.309339	-0.310388	0.360753	-0.185729	0.821406	0	-0.166667	0	-0.166667	NA	0.666667
310	STAN	5	0.5	0.498216	-0.117943	-0.309339	-0.310388	0.360753	-0.185729	0.821406	0	-0.166667	0	-0.166667	-1.2	0.666667
775	STAN	5	0.5	-0.501784	-0.117943	-0.309339	-0.310388	0.360753	-0.185729	-0.178594	0.6	0	0	0	-0.5	-1.5
775	STAN	2	0.5	-0.501784	-0.117943	-0.309339	-0.310388	0.360753	-0.185729	-0.178594	0.6	0	0	0	-0.5	0.5
775	STAN	5	0.5	-0.501784	-0.117943	-0.309339	-0.310388	0.360753	-0.185729	-0.178594	-0.4	0	0	0	-1.5	-1.5
581	STAN	4	0.5	-0.501784	-0.117943	0.690661	0.689612	-0.639247	-0.185729	-0.178594	0.166667	0	0	0	1	0.166667
581	STAN	6	0.5	-0.501784	-0.117943	0.690661	0.689612	-0.639247	-0.185729	-0.178594	0.166667	0	0	0	0	0.166667
581	STAN	2	0.5	-0.501784	-0.117943	0.690661	0.689612	-0.639247	-0.185729	-0.178594	0.166667	0	0	0	1	1.16667
599	STAN	4	0.5	0.498216	-0.117943	-0.309339	-0.310388	0.360753	0.814271	-0.178594	0	0	0.333333	0	0	0.333333
599	STAN	6	0.5	0.498216	-0.117943	-0.309339	-0.310388	0.360753	0.814271	-0.178594	0	0	-0.666667	0	0	0.333333
599	STAN	4	0.5	0.498216	-0.117943	-0.309339	-0.310388	0.360753	0.814271	-0.178594	0	0	0.333333	0	0	-1.66667
223	STAN	4	0.5	0.498216	-0.117943	-0.309339	-0.310388	0.360753	-0.185729	-0.178594	NA	0	0.2	0	0.8	1
223	STAN	6	0.5	0.498216	-0.117943	-0.309339	-0.310388	0.360753	-0.185729	-0.178594	0	0	0.2	0	1.8	-1
223	STAN	6	0.5	0.498216	-0.117943	-0.309339	-0.310388	0.360753	-0.185729	-0.178594	0	0	0.2	0	-2.2	-2
440	STAN	7	0.5	0.498216	-0.117943	-0.309339	-0.310388	0.360753	-0.185729	0.821406	0	0	-0.4	0.833333	-0.833333	-2.5
440	STAN	4	0.5	0.498216	-0.117943	-0.309339	-0.310388	0.360753	-0.185729	0.821406	0	0	-0.4	-0.166667	1.16667	0.5
440	STAN	4	0.5	0.498216	-0.117943	-0.309339	-0.310388	0.360753	-0.185729	0.821406	0	0	NA	-0.166667	0.166667	-0.5
795	STAN	3	0.5	-0.501784	-0.117943	-0.309339	0.689612	0.360753	0.814271	-0.178594	-0.166667	-0.166667	0.5	0	1.16667	0.833333
795	STAN	4	0.5	-0.501784	-0.117943	-0.309339	0.689612	0.360753	0.814271	-0.178594	0.833333	-0.166667	0.5	0	0.166667	-0.166667
795	STAN	4	0.5	-0.501784	-0.117943	-0.309339	0.689612	0.360753	0.814271	-0.178594	-0.166667	-0.166667	-0.5	0	0.166667	-0.166667
340	STAN	3	0.5	-0.501784	-0.117943	-0.309339	-0.310388	0.360753	-0.185729	-0.178594	0.166667	-0.166667	0.166667	-0.166667	0.2	-0.166667
340	STAN	4	0.5	-0.501784	-0.117943	-0.309339	-0.310388	0.360753	-0.185729	-0.178594	0.166667	-0.166667	0.166667	-0.166667	NA	0.833333
340	STAN	5	0.5	-0.501784	-0.117943	-0.309339	-0.310388	0.360753	-0.185729	-0.178594	0.166667	-0.166667	0.166667	0.833333	0.2	-0.166667
335	STAN	2	0.5	-0.501784	-0.117943	-0.309339	-0.310388	0.360753	-0.185729	-0.178594	0	-0.166667	NA	0	1.16667	1.16667
335	STAN	4	0.5	-0.501784	-0.117943	-0.309339	-0.310388	0.360753	-0.185729	-0.178594	0	-0.166667	-0.2	0	1.16667	0.166667
335	STAN	7	0.5	-0.501784	-0.117943	-0.309339	-0.310388	0.360753	-0.185729	-0.178594	0	-0.166667	-0.2	0	-1.83333	-1.83333
354	STAN	5	0.5	0.498216	-0.117943	-0.309339	-0.310388	0.360753	-0.185729	-0.178594	0	-0.166667	-0.166667	0	0.2	1
354	STAN	5	0.5	0.498216	-0.117943	-0.309339	-0.310388	0.360753	-0.185729	-0.178594	0	-0.166667	-0.166667	0	NA	1
354	STAN	6	0.5	0.498216	-0.117943	-0.309339	-0.310388	0.360753	-0.185729	-0.178594	0	-0.166667	-0.166667	0	1.2	1
236	STAN	2	0.5	-0.501784	0.882057	0.690661	-0.310388	0.360753	-0.185729	0.821406	0	0	-0.2	-0.166667	-0.5	0.666667
236	STAN	7	0.5	-0.501784	0.882057	0.690661	-0.310388	0.360753	-0.185729	0.821406	0	0	NA	0.833333	-1.5	-1.33333
236	STAN	3	0.5	-0.501784	0.882057	0.690661	-0.310388	0.360753	-0.185729	0.821406	0	0	0.8	-0.166667	1.5	0.666667
129	STAN	5	0.5	0.498216	0.882057	-0.309339	-0.310388	-0.639247	-0.185729	-0.178594	0	0.166667	0	0	0	-0.166667
129	STAN	4	0.5	0.498216	0.882057	-0.309339	-0.310388	-0.639247	-0.185729	-0.178594	0	0.166667	0	0	1	0.833333
129	STAN	4	0.5	0.498216	0.882057	-0.309339	-0.310388	-0.639247	-0.185729	-0.178594	0	0.166667	NA	0	0	-0.166667
132	STAN	2	0.5	-0.501784	-0.117943	0.690661	-0.310388	0.360753	-0.185729	-0.178594	-0.5	0	0	0	0.166667	0.666667
132	STAN	3	0.5	-0.501784	-0.117943	0.690661	-0.310388	0.360753	-0.185729	-0.178594	-0.5	0	0	0	0.166667	0.666667
132	STAN	4	0.5	-0.501784	-0.117943	0.690661	-0.310388	0.360753	-0.185729	-0.178594	0.5	0	0	0	1.16667	1.66667
458	STAN	1	0.5	0.498216	-0.117943	-0.309339	0.689612	-0.639247	-0.185729	-0.178594	-0.166667	0.166667	0	0	-0.333333	-0.166667
458	STAN	4	0.5	0.498216	-0.117943	-0.309339	0.689612	-0.639247	-0.185729	-0.178594	-0.166667	0.166667	0	0	-0.333333	-0.166667
458	STAN	2	0.5	0.498216	-0.117943	-0.309339	0.689612	-0.639247	-0.185729	-0.178594	-0.166667	0.166667	0	0	-0.333333	-0.166667
205	STAN	3	0.5	0.498216	-0.117943	-0.309339	-0.310388	0.360753	-0.185729	-0.178594	0	0.666667	-0.333333	0	0	-0.166667
205	STAN	3	0.5	0.498216	-0.117943	-0.309339	-0.310388	0.360753	-0.185729	-0.178594	0	-0.333333	-0.333333	0	0	-0.166667
205	STAN	2	0.5	0.498216	-0.117943	-0.309339	-0.310388	0.360753	-0.185729	-0.178594	0	-0.333333	0.666667	0	NA	-0.166667
350	STAN	2	0.5	-0.501784	-0.117943	-0.309339	0.689612	0.360753	-0.185729	-0.178594	0	-0.166667	0	0	0.333333	0.333333
350	STAN	3	0.5	-0.501784	-0.117943	-0.309339	0.689612	0.360753	-0.185729	-0.178594	0	-0.166667	0	0	-0.666667	-0.666667
350	STAN	1	0.5	-0.501784	-0.117943	-0.309339	0.689612	0.360753	-0.185729	-0.178594	0	-0.166667	0	0	-0.666667	-0.666667
510	STAN	3	0.5	-0.501784	-0.117943	-0.309339	-0.310388	0.360753	0.814271	-0.178594	-0.333333	0	0.166667	0	0.666667	0.5
510	STAN	4	0.5	-0.501784	-0.117943	-0.309339	-0.310388	0.360753	0.814271	-0.178594	-0.333333	0	0.166667	0	-1.33333	-0.5
510	STAN	4	0.5	-0.501784	-0.117943	-0.309339	-0.310388	0.360753	0.814271	-0.178594	-0.333333	0	0.166667	0	0.666667	0.5
87	STAN	4	0.5	-0.501784	-0.117943	0.690661	-0.310388	0.360753	-0.185729	0.821406	NA	0	0	0	0.166667	0
87	STAN	3	0.5	-0.501784	-0.117943	0.690661	-0.310388	0.360753	-0.185729	0.821406	0	0	0	0	0.166667	1
87	STAN	4	0.5	-0.501784	-0.117943	0.690661	-0.310388	0.360753	-0.185729	0.821406	0	0	0	0	0.166667	0
465	STAN	3	0.5	-0.501784	-0.117943	-0.309339	0.689612	-0.639247	-0.185729	-0.178594	-0.166667	0.333333	0	0	-0.333333	-0.333333
465	STAN	4	0.5	-0.501784	-0.117943	-0.309339	0.689612	-0.639247	-0.185729	-0.178594	-0.166667	0.333333	0	0	-1.33333	-0.333333
465	STAN	5	0.5	-0.501784	-0.117943	-0.309339	0.689612	-0.639247	-0.185729	-0.178594	-0.166667	0.333333	0	0	-0.333333	-0.333333
477	STAN	5	0.5	0.498216	-0.117943	-0.309339	0.689612	-0.639247	-0.185729	-0.178594	0	0.333333	0	0	-0.5	-1.33333
477	STAN	5	0.5	0.498216	-0.117943	-0.309339	0.689612	-0.639247	-0.185729	-0.178594	0	0.333333	0	0	-1.5	-0.333333
477	STAN	4	0.5	0.498216	-0.117943	-0.309339	0.689612	-0.639247	-0.185729	-0.178594	0	0.333333	0	0	0.5	0.666667
364	STAN	4	0.5	-0.501784	-0.117943	-0.309339	-0.310388	0.360753	-0.185729	0.821406	0.666667	0	0	0	-0.666667	-1.33333
364	STAN	4	0.5	-0.501784	-0.117943	-0.309339	-0.310388	0.360753	-0.185729	0.821406	0.666667	0	0	0	-0.666667	-0.333333
364	STAN	5	0.5	-0.501784	-0.117943	-0.309339	-0.310388	0.360753	-0.185729	0.821406	-0.333333	0	0	0	1.33333	0.666667
788	STAN	4	0.5	-0.501784	-0.117943	-0.309339	-0.310388	-0.639247	-0.185729	-0.178594	-0.166667	0.4	0	0	-1.5	0
788	STAN	5	0.5	-0.501784	-0.117943	-0.309339	-0.310388	-0.639247	-0.185729	-0.178594	-0.166667	0.4	0	0	0.5	1
788	STAN	4	0.5	-0.501784	-0.117943	-0.309339	-0.310388	-0.639247	-0.185729	-0.178594	0.833333	0.4	0	0	-0.5	0
691	STAN	3	0.5	0.498216	-0.117943	-0.309339	-0.310388	0.360753	-0.185729	-0.178594	0	0	0	0	1	0.666667
691	STAN	3	0.5	0.498216	-0.117943	-0.309339	-0.310388	0.360753	-0.185729	-0.178594	0	0	0	NA	1	0.666667
691	STAN	5	0.5	0.498216	-0.117943	-0.309339	-0.310388	0.360753	-0.185729	-0.178594	0	0	0	0	-1	-1.33333
199	STAN	2	0.5	0.498216	-0.117943	-0.309339	-0.310388	-0.639247	-0.185729	-0.178594	0	0	0	0	0.2	0.333333
199	STAN	5	0.5	0.498216	-0.117943	-0.309339	-0.310388	-0.639247	-0.185729	-0.178594	0	0	0	0	0.2	0.333333
199	STAN	2	0.5	0.498216	-0.117943	-0.309339	-0.310388	-0.639247	-0.185729	-0.178594	0	0	0	0	0.2	0.333333
636	STAN	5	0.5	-0.501784	-0.117943	-0.309339	0.689612	-0.639247	0.814271	-0.178594	0.166667	0.166667	0	-0.166667	-1.16667	-0.833333
636	STAN	5	0.5	-0.501784	-0.117943	-0.309339	0.689612	-0.639247	0.814271	-0.178594	0.166667	0.166667	0	-0.166667	0.833333	0.166667
636	STAN	6	0.5	-0.501784	-0.117943	-0.309339	0.689612	-0.639247	0.814271	-0.178594	0.166667	0.166667	0	-0.166667	1.83333	0.166667
397	STAN	3	0.5	0.498216	0.882057	0.690661	-0.310388	0.360753	-0.185729	0.821406	0	0	0	0	0.5	-0.5
397	STAN	3	0.5	0.498216	0.882057	0.690661	-0.310388	0.360753	-0.185729	0.821406	0	0	0	0	-0.5	-0.5
397	STAN	3	0.5	0.498216	0.882057	0.690661	-0.310388	0.360753	-0.185729	0.821406	0	0	0	0	-0.5	0.5
699	STAN	4	0.5	0.498216	-0.117943	-0.309339	-0.310388	0.360753	0.814271	0.821406	0	0	0.666667	-0.333333	0.833333	0.5
699	STAN	5	0.5	0.498216	-0.117943	-0.309339	-0.310388	0.360753	0.814271	0.821406	0	0	-0.333333	-0.333333	-1.16667	0.5
699	STAN	3	0.5	0.498216	-0.117943	-0.309339	-0.310388	0.360753	0.814271	0.821406	0	0	-0.333333	-0.333333	0.833333	0.5
131	STAN	4	0.5	-0.501784	-0.117943	0.690661	0.689612	-0.639247	-0.185729	-0.178594	0.666667	0.333333	-0.5	0	-1	-0.166667
131	STAN	4	0.5	-0.501784	-0.117943	0.690661	0.689612	-0.639247	-0.185729	-0.178594	-0.333333	0.333333	-0.5	0	1	0.833333
131	STAN	5	0.5	-0.501784	-0.117943	0.690661	0.689612	-0.639247	-0.185729	-0.178594	0.666667	0.333333	-0.5	0	-2	-1.16667
574	STAN	1	0.5	0.498216	0.882057	0.690661	-0.310388	0.360753	-0.185729	-0.178594	0	0	0	0	0.333333	0.5
574	STAN	2	0.5	0.498216	0.882057	0.690661	-0.310388	0.360753	-0.185729	-0.178594	0	0	0	0	0.333333	0.5
574	STAN	2	0.5	0.498216	0.882057	0.690661	-0.310388	0.360753	-0.185729	-0.178594	0	0	0	0	0.333333	0.5
385	STAN	5	0.5	0.498216	0.882057	-0.309339	-0.310388	0.360753	-0.185729	-0.178594	0	0	0	0	0.166667	0.166667
385	STAN	4	0.5	0.498216	0.882057	-0.309339	-0.310388	0.360753	-0.185729	-0.178594	NA	NA	NA	NA	0.166667	0.166667
385	STAN	5	0.5	0.498216	0.882057	-0.309339	-0.310388	0.360753	-0.185729	-0.178594	0	0	NA	0	0.166667	0.166667
334	STAN	2	0.5	0.498216	-0.117943	-0.309339	-0.310388	0.360753	-0.185729	-0.178594	0	0	0	0	-1.33333	-1.16667
334	STAN	3	0.5	0.498216	-0.117943	-0.309339	-0.310388	0.360753	-0.185729	-0.178594	0	0	0	0	0.666667	0.833333
334	STAN	1	0.5	0.498216	-0.117943	-0.309339	-0.310388	0.360753	-0.185729	-0.178594	0	0	0	0	1.66667	0.833333
469	STAN	3	0.5	0.498216	-0.117943	-0.309339	0.689612	-0.639247	-0.185729	-0.178594	0	0.166667	0	0	-0.333333	-0.166667
469	STAN	4	0.5	0.498216	-0.117943	-0.309339	0.689612	-0.639247	-0.185729	-0.178594	0	0.166667	0	0	-0.333333	-0.166667
469	STAN	4	0.5	0.498216	-0.117943	-0.309339	0.689612	-0.639247	-0.185729	-0.178594	0	0.166667	0	0	0.666667	-0.166667
349	STAN	6	0.5	0.498216	-0.117943	-0.309339	-0.310388	0.360753	-0.185729	0.821406	0	0	0.833333	0	0.333333	0.333333
349	STAN	4	0.5	0.498216	-0.117943	-0.309339	-0.310388	0.360753	-0.185729	0.821406	0	0	-0.166667	0	0.333333	-0.666667
349	STAN	3	0.5	0.498216	-0.117943	-0.309339	-0.310388	0.360753	-0.185729	0.821406	0	0	-0.166667	0	0.333333	0.333333
419	STAN	4	0.5	0.498216	-0.117943	-0.309339	-0.310388	0.360753	-0.185729	-0.178594	-0.166667	0	0	0	0.166667	-0.666667
419	STAN	3	0.5	0.498216	-0.117943	-0.309339	-0.310388	0.360753	-0.185729	-0.178594	-0.166667	0	0	0	0.166667	0.333333
419	STAN	2	0.5	0.498216	-0.117943	-0.309339	-0.310388	0.360753	-0.185729	-0.178594	-0.166667	0	0	0	0.166667	0.333333
557	STAN	2	0.5	-0.501784	-0.117943	0.690661	0.689612	0.360753	-0.185729	-0.178594	0.5	-0.5	0	0	1	1.16667
557	STAN	7	0.5	-0.501784	-0.117943	0.690661	0.689612	0.360753	-0.185729	-0.178594	0.5	-0.5	0	0	0	0.166667
557	STAN	3	0.5	-0.501784	-0.117943	0.690661	0.689612	0.360753	-0.185729	-0.178594	0.5	-0.5	0	0	0	0.166667
411	STAN	2	0.5	0.498216	0.882057	0.690661	-0.310388	0.360753	-0.185729	-0.178594	0	0	0	0	0	-0.333333
411	STAN	4	0.5	0.498216	0.882057	0.690661	-0.310388	0.360753	-0.185729	-0.178594	0	0	0	0	1	0.666667
411	STAN	3	0.5	0.498216	0.882057	0.690661	-0.310388	0.360753	-0.185729	-0.178594	0	0	NA	0	0	-0.333333
227	STAN	6	0.6	-0.501784	-0.117943	-0.309339	0.689612	0.360753	-0.185729	-0.178594	-0.6	0	-0.2	0	0.4	0.2
227	STAN	4	0.6	-0.501784	-0.117943	-0.309339	0.689612	0.360753	-0.185729	-0.178594	0.4	0	0.8	0	0.4	0.2
160	STAN	2	0.5	0.498216	-0.117943	-0.309339	-0.310388	-0.639247	-0.185729	-0.178594	0	0.5	0	0	0.833333	0.833333
160	STAN	2	0.5	0.498216	-0.117943	-0.309339	-0.310388	-0.639247	-0.185729	-0.178594	0	0.5	0	0	-0.166667	-0.166667
160	STAN	2	0.5	0.498216	-0.117943	-0.309339	-0.310388	-0.639247	-0.185729	-0.178594	0	0.5	0	0	0.833333	0.833333
284	STAN	3	0.5	-0.501784	0.882057	-0.309339	-0.310388	0.360753	-0.185729	-0.178594	-0.333333	-0.166667	0	0	-1.33333	-0.5
284	STAN	2	0.5	-0.501784	0.882057	-0.309339	-0.310388	0.360753	-0.185729	-0.178594	-0.333333	-0.166667	0	0	-0.333333	-0.5
284	STAN	1	0.5	-0.501784	0.882057	-0.309339	-0.310388	0.360753	-0.185729	-0.178594	0.666667	-0.166667	0	0	0.666667	0.5
595	STAN	2	0.5	-0.501784	-0.117943	-0.309339	0.689612	0.360753	-0.185729	0.821406	0.2	-0.4	0	0	-0.333333	0
595	STAN	2	0.5	-0.501784	-0.117943	-0.309339	0.689612	0.360753	-0.185729	0.821406	0.2	-0.4	0	0	0.666667	1
595	STAN	4	0.5	-0.501784	-0.117943	-0.309339	0.689612	0.360753	-0.185729	0.821406	0.2	-0.4	0	NA	0.666667	0
407	STAN	8	0.5	-0.501784	-0.117943	-0.309339	0.689612	0.360753	-0.185729	-0.178594	-0.5	-0.5	0	0	-0.8	-1
407	STAN	8	0.5	-0.501784	-0.117943	-0.309339	0.689612	0.360753	-0.185729	-0.178594	0.5	-0.5	0	0	-0.8	0
407	STAN	4	0.5	-0.501784	-0.117943	-0.309339	0.689612	0.360753	-0.185729	-0.178594	0.5	-0.5	0	0	1.2	0
452	STAN	5	0.5	-0.501784	-0.117943	-0.309339	0.689612	-0.639247	-0.185729	-0.178594	0.166667	0.333333	-0.333333	0	0.166667	0.333333
452	STAN	8	0.5	-0.501784	-0.117943	-0.309339	0.689612	-0.639247	-0.185729	-0.178594	0.166667	0.333333	0.666667	0	0.166667	0.333333
452	STAN	5	0.5	-0.501784	-0.117943	-0.309339	0.689612	-0.639247	-0.185729	-0.178594	0.166667	0.333333	0.666667	0	1.16667	1.33333
656	STAN	6	0.5	-0.501784	-0.117943	-0.309339	-0.310388	0.360753	0.814271	0.821406	0.833333	0	0.333333	0.666667	0.666667	1.16667
656	STAN	6	0.5	-0.501784	-0.117943	-0.309339	-0.310388	0.360753	0.814271	0.821406	-0.166667	0	0.333333	-0.333333	-0.333333	0.166667
656	STAN	8	0.5	-0.501784	-0.117943	-0.309339	-0.310388	0.360753	0.814271	0.821406	-0.166667	0	0.333333	0.666667	-1.33333	-1.83333
115	STAN	3	0.5	0.498216	-0.117943	0.690661	-0.310388	-0.639247	-0.185729	-0.178594	0	0.333333	0	0	-0.5	-0.5
115	STAN	2	0.5	0.498216	-0.117943	0.690661	-0.310388	-0.639247	-0.185729	-0.178594	0	0.333333	0	0	0.5	0.5
115	STAN	2	0.5	0.498216	-0.117943	0.690661	-0.310388	-0.639247	-0.185729	-0.178594	0	0.333333	0	0	-0.5	-0.5
787	STAN	3	0.5	-0.501784	-0.117943	-0.309339	-0.310388	-0.639247	-0.185729	-0.178594	-0.166667	0.5	0	NA	0.5	0.166667
787	STAN	7	0.5	-0.501784	-0.117943	-0.309339	-0.310388	-0.639247	-0.185729	-0.178594	0.833333	0.5	0	0	0.5	0.166667
787	STAN	5	0.5	-0.501784	-0.117943	-0.309339	-0.310388	-0.639247	-0.185729	-0.178594	-0.166667	0.5	0	0	0.5	0.166667
584	STAN	5	0.5	-0.501784	-0.117943	-0.309339	-0.310388	0.360753	-0.185729	-0.178594	0.333333	0	0	0	0.166667	-0.666667
584	STAN	4	0.5	-0.501784	-0.117943	-0.309339	-0.310388	0.360753	-0.185729	-0.178594	0.333333	0	0	0	0.166667	0.333333
584	STAN	3	0.5	-0.501784	-0.117943	-0.309339	-0.310388	0.360753	-0.185729	-0.178594	-0.666667	0	0	0	0.166667	0.333333
597	STAN	5	0.5	-0.501784	-0.117943	-0.309339	-0.310388	0.360753	-0.185729	0.821406	-0.4	-0.333333	0.666667	0.666667	-1.83333	-0.333333
597	STAN	5	0.5	-0.501784	-0.117943	-0.309339	-0.310388	0.360753	-0.185729	0.821406	0.6	0.666667	-0.333333	-0.333333	1.16667	-0.333333
597	STAN	5	0.5	-0.501784	-0.117943	-0.309339	-0.310388	0.360753	-0.185729	0.821406	0.6	-0.333333	-0.333333	0.666667	0.166667	0.666667
122	STAN	3	0.5	0.498216	-0.117943	0.690661	-0.310388	0.360753	-0.185729	-0.178594	NA	-0.166667	-0.333333	0	0.5	1
122	STAN	5	0.5	0.498216	-0.117943	0.690661	-0.310388	0.360753	-0.185729	-0.178594	0	-0.166667	0.666667	0	0.5	0
122	STAN	5	0.5	0.498216	-0.117943	0.690661	-0.310388	0.360753	-0.185729	-0.178594	0	-0.166667	-0.333333	0	-1.5	-2
676	STAN	3	0.5	0.498216	-0.117943	-0.309339	-0.310388	-0.639247	-0.185729	-0.178594	0	0.5	0.5	0	0	-0.166667
676	STAN	2	0.5	0.498216	-0.117943	-0.309339	-0.310388	-0.639247	-0.185729	-0.178594	0	0.5	0.5	0	0	-0.166667
676	STAN	3	0.5	0.498216	-0.117943	-0.309339	-0.310388	-0.639247	-0.185729	-0.178594	0	0.5	0.5	0	1	0.833333
479	STAN	3	0.6	0.498216	-0.117943	-0.309339	-0.310388	0.360753	-0.185729	-0.178594	0	0.8	0.5	0	1	1.2
479	STAN	5	0.6	0.498216	-0.117943	-0.309339	-0.310388	0.360753	-0.185729	-0.178594	0	-0.2	0.5	0	0	0.2
383	STAN	5	0.5	0.498216	-0.117943	0.690661	-0.310388	0.360753	-0.185729	0.821406	0	0	0.75	0	0	0.333333
383	STAN	4	0.5	0.498216	-0.117943	0.690661	-0.310388	0.360753	-0.185729	0.821406	0	0	NA	0	0	0.333333
383	STAN	3	0.5	0.498216	-0.117943	0.690661	-0.310388	0.360753	-0.185729	0.821406	0	0	-0.25	0	0	0.333333
369	STAN	6	0.5	-0.501784	-0.117943	-0.309339	0.689612	0.360753	-0.185729	-0.178594	-0.166667	-0.166667	-0.333333	-0.166667	-1.33333	-1.16667
369	STAN	4	0.5	-0.501784	-0.117943	-0.309339	0.689612	0.360753	-0.185729	-0.178594	-0.166667	-0.166667	0.666667	-0.166667	0.666667	0.833333
369	STAN	4	0.5	-0.501784	-0.117943	-0.309339	0.689612	0.360753	-0.185729	-0.178594	0.833333	-0.166667	-0.333333	-0.166667	0.666667	0.833333
159	STAN	4	0.5	-0.501784	-0.117943	-0.309339	-0.310388	0.360753	-0.185729	-0.178594	0	0	0	0	-0.666667	0
159	STAN	2	0.5	-0.501784	-0.117943	-0.309339	-0.310388	0.360753	-0.185729	-0.178594	0	0	0	0	0.333333	0
159	STAN	4	0.5	-0.501784	-0.117943	-0.309339	-0.310388	0.360753	-0.185729	-0.178594	0	0	0	0	0.333333	-1
539	STAN	3	0.5	-0.501784	-0.117943	-0.309339	-0.310388	0.360753	-0.185729	-0.178594	-0.4	0	0	0	1.16667	0.333333
539	STAN	4	0.5	-0.501784	-0.117943	-0.309339	-0.310388	0.360753	-0.185729	-0.178594	NA	NA	NA	NA	0.166667	0.333333
539	STAN	4	0.5	-0.501784	-0.117943	-0.309339	-0.310388	0.360753	-0.185729	-0.178594	0.6	0	0	0	0.166667	0.333333
526	STAN	3	0.5	0.498216	-0.117943	-0.309339	-0.310388	0.360753	-0.185729	0.821406	0	0	0	0	0.833333	1.16667
526	STAN	3	0.5	0.498216	-0.117943	-0.309339	-0.310388	0.360753	-0.185729	0.821406	0	0	0	0	-0.166667	-0.833333
526	STAN	5	0.5	0.498216	-0.117943	-0.309339	-0.310388	0.360753	-0.185729	0.821406	0	0	0	0	-0.166667	0.166667
765	STAN	2	0.5	0.498216	0.882057	-0.309339	0.689612	0.360753	-0.185729	-0.178594	0	-0.333333	0	0	-1.66667	-1
765	STAN	2	0.5	0.498216	0.882057	-0.309339	0.689612	0.360753	-0.185729	-0.178594	0	-0.333333	0	0	0.333333	0
765	STAN	3	0.5	0.498216	0.882057	-0.309339	0.689612	0.360753	-0.185729	-0.178594	0	-0.333333	0	0	1.33333	1
598	STAN	5	0.5	-0.501784	-0.117943	-0.309339	-0.310388	0.360753	-0.185729	0.821406	0	-0.166667	-0.166667	-0.333333	-0.5	0.333333
598	STAN	4	0.5	-0.501784	-0.117943	-0.309339	-0.310388	0.360753	-0.185729	0.821406	0	-0.166667	-0.166667	-0.333333	1.5	0.333333
598	STAN	7	0.5	-0.501784	-0.117943	-0.309339	-0.310388	0.360753	-0.185729	0.821406	0	-0.166667	-0.166667	0.666667	-0.5	1.33333
437	STAN	2	0.5	0.498216	-0.117943	-0.309339	0.689612	-0.639247	-0.185729	-0.178594	0.6	0.2	0	0	0.833333	0.666667
437	STAN	4	0.5	0.498216	-0.117943	-0.309339	0.689612	-0.639247	-0.185729	-0.178594	-0.4	0.2	0	0	-0.166667	-2.33333
437	STAN	7	0.5	0.498216	-0.117943	-0.309339	0.689612	-0.639247	-0.185729	-0.178594	-0.4	0.2	0	0	-2.16667	0.666667
535	STAN	5	0.5	0.498216	0.882057	-0.309339	-0.310388	0.360753	-0.185729	0.821406	-0.166667	0	0	0	1.5	1.66667
535	STAN	6	0.5	0.498216	0.882057	-0.309339	-0.310388	0.360753	-0.185729	0.821406	-0.166667	0	0	0	-2.5	-1.33333
535	STAN	4	0.5	0.498216	0.882057	-0.309339	-0.310388	0.360753	-0.185729	0.821406	-0.166667	0	NA	0	-0.5	-0.333333
405	STAN	4	0.5	-0.501784	-0.117943	0.690661	-0.310388	-0.639247	0.814271	-0.178594	0.333333	0.166667	0	0	NA	0.666667
405	STAN	2	0.5	-0.501784	-0.117943	0.690661	-0.310388	-0.639247	0.814271	-0.178594	-0.666667	0.166667	NA	0	0.8	-0.333333
405	STAN	3	0.5	-0.501784	-0.117943	0.690661	-0.310388	-0.639247	0.814271	-0.178594	0.333333	0.166667	0	0	-1.2	0.666667
616	STAN	2	0.5	0.498216	-0.117943	-0.309339	-0.310388	0.360753	-0.185729	-0.178594	0	0	-0.2	0	0.666667	0.333333
616	STAN	3	0.5	0.498216	-0.117943	-0.309339	-0.310388	0.360753	-0.185729	-0.178594	0	0	-0.2	0	0.666667	0.333333
616	STAN	2	0.5	0.498216	-0.117943	-0.309339	-0.310388	0.360753	-0.185729	-0.178594	0	0	-0.2	0	0.666667	0.333333
566	STAN	4	0.5	0.498216	-0.117943	0.690661	-0.310388	0.360753	-0.185729	-0.178594	0	-0.166667	-0.166667	0	0.166667	-1.83333
566	STAN	4	0.5	0.498216	-0.117943	0.690661	-0.310388	0.360753	-0.185729	-0.178594	0	0.833333	-0.166667	0	0.166667	0.166667
566	STAN	2	0.5	0.498216	-0.117943	0.690661	-0.310388	0.360753	-0.185729	-0.178594	0	-0.166667	-0.166667	0	-1.83333	0.166667
374	STAN	2	0.5	0.498216	-0.117943	0.690661	-0.310388	0.360753	-0.185729	-0.178594	0	-0.166667	0	0	-1.83333	-1
374	STAN	3	0.5	0.498216	-0.117943	0.690661	-0.310388	0.360753	-0.185729	-0.178594	0	-0.166667	NA	0	0.166667	0
374	STAN	2	0.5	0.498216	-0.117943	0.690661	-0.310388	0.360753	-0.185729	-0.178594	0	-0.166667	0	0	1.16667	1
502	STAN	5	0.5	0.498216	-0.117943	-0.309339	0.689612	-0.639247	-0.185729	-0.178594	-0.666667	0.333333	0	0	-1.66667	-0.666667
502	STAN	2	0.5	0.498216	-0.117943	-0.309339	0.689612	-0.639247	-0.185729	-0.178594	-0.666667	0.333333	0	0	1.33333	1.33333
502	STAN	3	0.5	0.498216	-0.117943	-0.309339	0.689612	-0.639247	-0.185729	-0.178594	0.333333	0.333333	0	0	0.333333	0.333333
783	STAN	2	0.5	0.498216	-0.117943	-0.309339	-0.310388	0.360753	-0.185729	-0.178594	0	0	-0.166667	-0.166667	0	-0.166667
783	STAN	5	0.5	0.498216	-0.117943	-0.309339	-0.310388	0.360753	-0.185729	-0.178594	0	0	-0.166667	-0.166667	0	0.833333
783	STAN	3	0.5	0.498216	-0.117943	-0.309339	-0.310388	0.360753	-0.185729	-0.178594	0	0	-0.166667	-0.166667	0	-0.166667
534	STAN	3	0.5	-0.501784	-0.117943	-0.309339	0.689612	0.360753	-0.185729	-0.178594	0.166667	-0.5	-0.166667	0	0.666667	0.8
534	STAN	2	0.5	-0.501784	-0.117943	-0.309339	0.689612	0.360753	-0.185729	-0.178594	0.166667	0.5	-0.166667	0	0.666667	NA
534	STAN	7	0.5	-0.501784	-0.117943	-0.309339	0.689612	0.360753	-0.185729	-0.178594	0.166667	-0.5	-0.166667	0	-1.33333	-1.2
640	STAN	4	0.5	-0.501784	-0.117943	-0.309339	0.689612	0.360753	-0.185729	-0.178594	0.5	0	0	-0.166667	0.8	0
640	STAN	6	0.5	-0.501784	-0.117943	-0.309339	0.689612	0.360753	-0.185729	-0.178594	0.5	0	0	-0.166667	-1.2	0
640	STAN	4	0.5	-0.501784	-0.117943	-0.309339	0.689612	0.360753	-0.185729	-0.178594	0.5	0	0	-0.166667	-1.2	0
601	STAN	1	0.5	-0.501784	-0.117943	-0.309339	0.689612	0.360753	0.814271	-0.178594	0.666667	0	0.333333	0	-0.166667	0.666667
601	STAN	2	0.5	-0.501784	-0.117943	-0.309339	0.689612	0.360753	0.814271	-0.178594	0.666667	0	0.333333	0	0.833333	0.666667
601	STAN	2	0.5	-0.501784	-0.117943	-0.309339	0.689612	0.360753	0.814271	-0.178594	-0.333333	0	0.333333	0	-0.166667	-0.333333
518	STAN	8	0.5	0.498216	-0.117943	-0.309339	-0.310388	0.360753	-0.185729	-0.178594	0	-0.166667	0.8	0	-1.83333	-2.16667
518	STAN	3	0.5	0.498216	-0.117943	-0.309339	-0.310388	0.360753	-0.185729	-0.178594	0	-0.166667	NA	0	-0.833333	-0.166667
518	STAN	3	0.5	0.498216	-0.117943	-0.309339	-0.310388	0.360753	-0.185729	-0.178594	0	0.833333	-0.2	0	1.16667	0.833333
764	STAN	7	0.5	-0.501784	0.882057	-0.309339	-0.310388	-0.639247	-0.185729	-0.178594	0.333333	0.333333	0	0	0.166667	1.5
764	STAN	6	0.5	-0.501784	0.882057	-0.309339	-0.310388	-0.639247	-0.185729	-0.178594	0.333333	0.333333	0	0	-0.833333	-1.5
764	STAN	3	0.5	-0.501784	0.882057	-0.309339	-0.310388	-0.639247	-0.185729	-0.178594	0.333333	0.333333	0	0	2.16667	1.5
345	STAN	5	0.5	-0.501784	-0.117943	-0.309339	-0.310388	0.360753	0.814271	-0.178594	0.666667	-0.333333	0	0	-0.666667	-0.333333
345	STAN	5	0.5	-0.501784	-0.117943	-0.309339	-0.310388	0.360753	0.814271	-0.178594	0.666667	-0.333333	0	0	0.333333	-0.333333
345	STAN	6	0.5	-0.501784	-0.117943	-0.309339	-0.310388	0.360753	0.814271	-0.178594	-0.333333	-0.333333	0	0	0.333333	-0.333333
509	STAN	4	0.5	0.498216	-0.117943	-0.309339	-0.310388	0.360753	-0.185729	-0.178594	0	0	0	0	-2	-0.2
509	STAN	2	0.5	0.498216	-0.117943	-0.309339	-0.310388	0.360753	-0.185729	-0.178594	0	0	0	0	1	0.8
509	STAN	4	0.5	0.498216	-0.117943	-0.309339	-0.310388	0.360753	-0.185729	-0.178594	0	0	0	0	0	-0.2
771	STAN	4	0.5	-0.501784	-0.117943	0.690661	-0.310388	0.360753	-0.185729	-0.178594	0.333333	0	0	0	-0.5	-1
771	STAN	4	0.5	-0.501784	-0.117943	0.690661	-0.310388	0.360753	-0.185729	-0.178594	0.333333	0	0	0	-0.5	0
771	STAN	3	0.5	-0.501784	-0.117943	0.690661	-0.310388	0.360753	-0.185729	-0.178594	-0.666667	0	0	0	-0.5	0
587	STAN	4	0.5	0.498216	0.882057	0.690661	-0.310388	0.360753	-0.185729	-0.178594	0	0	-0.166667	-0.166667	0.666667	-0.166667
587	STAN	6	0.5	0.498216	0.882057	0.690661	-0.310388	0.360753	-0.185729	-0.178594	0	0	-0.166667	-0.166667	-0.333333	-0.166667
587	STAN	2	0.5	0.498216	0.882057	0.690661	-0.310388	0.360753	-0.185729	-0.178594	0	0	0.833333	0.833333	-0.333333	-0.166667
157	STAN	4	0.5	-0.501784	-0.117943	-0.309339	0.689612	0.360753	0.814271	-0.178594	0.166667	0	0.333333	0	0.333333	0.166667
157	STAN	3	0.5	-0.501784	-0.117943	-0.309339	0.689612	0.360753	0.814271	-0.178594	0.166667	0	-0.666667	0	0.333333	0.166667
157	STAN	5	0.5	-0.501784	-0.117943	-0.309339	0.689612	0.360753	0.814271	-0.178594	0.166667	0	0.333333	0	-1.66667	0.166667
654	STAN	5	0.5	-0.501784	-0.117943	-0.309339	-0.310388	0.360753	-0.185729	-0.178594	-0.166667	0	0	0	-1	-0.166667
654	STAN	3	0.5	-0.501784	-0.117943	-0.309339	-0.310388	0.360753	-0.185729	-0.178594	0.833333	0	0	0	1	0.833333
654	STAN	2	0.5	-0.501784	-0.117943	-0.309339	-0.310388	0.360753	-0.185729	-0.178594	-0.166667	0	0	0	0	-0.166667
652	STAN	7	0.5	0.498216	-0.117943	-0.309339	-0.310388	-0.639247	-0.185729	-0.178594	0	0.166667	-0.166667	NA	-0.5	1.16667
652	STAN	4	0.5	0.498216	-0.117943	-0.309339	-0.310388	-0.639247	-0.185729	-0.178594	0	0.166667	-0.166667	0	0.5	0.166667
652	STAN	3	0.5	0.498216	-0.117943	-0.309339	-0.310388	-0.639247	-0.185729	-0.178594	0	0.166667	-0.166667	0	0.5	0.166667
529	STAN	4	0.5	-0.501784	-0.117943	-0.309339	-0.310388	0.360753	-0.185729	-0.178594	0.833333	0	-0.2	0	0.333333	0.333333
529	STAN	4	0.5	-0.501784	-0.117943	-0.309339	-0.310388	0.360753	-0.185729	-0.178594	-0.166667	0	NA	0	-0.666667	-0.666667
529	STAN	6	0.5	-0.501784	-0.117943	-0.309339	-0.310388	0.360753	-0.185729	-0.178594	-0.166667	0	0.8	0	-0.666667	-0.666667
182	STAN	2	0.5	-0.501784	-0.117943	0.690661	0.689612	-0.639247	0.814271	0.821406	0.333333	0.333333	0.333333	-0.166667	-1.5	0
182	STAN	4	0.5	-0.501784	-0.117943	0.690661	0.689612	-0.639247	0.814271	0.821406	0.333333	0.333333	0.333333	-0.166667	0.5	0
182	STAN	6	0.5	-0.501784	-0.117943	0.690661	0.689612	-0.639247	0.814271	0.821406	0.333333	0.333333	0.333333	-0.166667	-1.5	-1
500	STAN	3	0.5	0.498216	-0.117943	-0.309339	-0.310388	0.360753	-0.185729	-0.178594	0	0	0.2	0	1	1
500	STAN	7	0.5	0.498216	-0.117943	-0.309339	-0.310388	0.360753	-0.185729	-0.178594	0	0	NA	0	NA	NA
500	STAN	7	0.5	0.498216	-0.117943	-0.309339	-0.310388	0.360753	-0.185729	-0.178594	0	0	-0.8	0	-1	-2
450	STAN	7	0.5	-0.501784	-0.117943	-0.309339	0.689612	0.360753	-0.185729	-0.178594	0.5	0	0.666667	0.666667	-1.2	-1.5
450	STAN	6	0.5	-0.501784	-0.117943	-0.309339	0.689612	0.360753	-0.185729	-0.178594	-0.5	0	-0.333333	-0.333333	-1.2	-1.5
450	STAN	2	0.5	-0.501784	-0.117943	-0.309339	0.689612	0.360753	-0.185729	-0.178594	0.5	0	-0.333333	-0.333333	0.8	0.5
207	STAN	4	0.6	-0.501784	-0.117943	-0.309339	-0.310388	0.360753	0.814271	0.821406	-0.4	-0.2	0	0	0	-0.4
207	STAN	5	0.6	-0.501784	-0.117943	-0.309339	-0.310388	0.360753	0.814271	0.821406	-0.4	-0.2	0	0	0	0.6
690	STAN	4	0.5	-0.501784	-0.117943	-0.309339	0.689612	-0.639247	0.814271	0.821406	NA	0.333333	0.333333	0	-1.5	-2.16667
690	STAN	4	0.5	-0.501784	-0.117943	-0.309339	0.689612	-0.639247	0.814271	0.821406	NA	0.333333	0.333333	0	1.5	0.833333
690	STAN	7	0.5	-0.501784	-0.117943	-0.309339	0.689612	-0.639247	0.814271	0.821406	0	0.333333	0.333333	0	-1.5	-1.16667
158	STAN	3	0.4	-0.501784	-0.117943	-0.309339	0.689612	0.360753	-0.185729	-0.178594	0.8	-0.2	0	0	-0.4	-0.2
158	STAN	4	0.4	-0.501784	-0.117943	-0.309339	0.689612	0.360753	-0.185729	-0.178594	-0.2	-0.2	NA	0	0.6	0.8
158	STAN	2	0.4	-0.501784	-0.117943	-0.309339	0.689612	0.360753	-0.185729	-0.178594	-0.2	-0.2	0	0	-0.4	-1.2
130	STAN	5	0.5	-0.501784	-0.117943	-0.309339	-0.310388	-0.639247	-0.185729	0.821406	0.166667	0.166667	0	0	0.666667	0.833333
130	STAN	7	0.5	-0.501784	-0.117943	-0.309339	-0.310388	-0.639247	-0.185729	0.821406	0.166667	0.166667	0	0	0.666667	0.833333
130	STAN	6	0.5	-0.501784	-0.117943	-0.309339	-0.310388	-0.639247	-0.185729	0.821406	0.166667	0.166667	0	0	-1.33333	-1.16667
133	STAN	7	0.5	0.498216	-0.117943	0.690661	-0.310388	-0.639247	-0.185729	-0.178594	0	0.333333	-0.2	0	-0.666667	0.4
133	STAN	4	0.5	0.498216	-0.117943	0.690661	-0.310388	-0.639247	-0.185729	-0.178594	0	0.333333	-0.2	0	0.333333	1.4
133	STAN	3	0.5	0.498216	-0.117943	0.690661	-0.310388	-0.639247	-0.185729	-0.178594	0	0.333333	-0.2	0	0.333333	NA
551	STAN	4	0.5	0.498216	-0.117943	0.690661	-0.310388	0.360753	-0.185729	0.821406	0	0	0	0	-2	-0.333333
551	STAN	2	0.5	0.498216	-0.117943	0.690661	-0.310388	0.360753	-0.185729	0.821406	0	0	0	0	1	0.666667
551	STAN	3	0.5	0.498216	-0.117943	0.690661	-0.310388	0.360753	-0.185729	0.821406	0	0	0	0	0	-0.333333
715	STAN	3	0.5	0.498216	-0.117943	0.690661	-0.310388	-0.639247	0.814271	-0.178594	0	-0.333333	-0.666667	0	0.5	0.5
715	STAN	6	0.5	0.498216	-0.117943	0.690661	-0.310388	-0.639247	0.814271	-0.178594	0	0.666667	0.333333	NA	-1.5	0.5
715	STAN	4	0.5	0.498216	-0.117943	0.690661	-0.310388	-0.639247	0.814271	-0.178594	0	0.666667	0.333333	0	0.5	0.5
629	STAN	4	0.5	0.498216	-0.117943	-0.309339	-0.310388	-0.639247	-0.185729	-0.178594	0	-0.5	0	0	0.166667	0.5
629	STAN	4	0.5	0.498216	-0.117943	-0.309339	-0.310388	-0.639247	-0.185729	-0.178594	0	0.5	0	0	0.166667	0.5
629	STAN	5	0.5	0.498216	-0.117943	-0.309339	-0.310388	-0.639247	-0.185729	-0.178594	0	0.5	0	0	-0.833333	-0.5
793	STAN	6	0.5	-0.501784	-0.117943	0.690661	0.689612	-0.639247	0.814271	-0.178594	-0.5	0.166667	0	-0.166667	1.16667	1.33333
793	STAN	6	0.5	-0.501784	-0.117943	0.690661	0.689612	-0.639247	0.814271	-0.178594	0.5	-0.833333	0	-0.166667	-0.833333	-1.66667
793	STAN	4	0.5	-0.501784	-0.117943	0.690661	0.689612	-0.639247	0.814271	-0.178594	0.5	0.166667	0	-0.166667	0.166667	0.333333
668	STAN	2	0.5	-0.501784	-0.117943	-0.309339	-0.310388	-0.639247	-0.185729	-0.178594	0.333333	0.5	0.166667	0	0.333333	0.166667
668	STAN	4	0.5	-0.501784	-0.117943	-0.309339	-0.310388	-0.639247	-0.185729	-0.178594	0.333333	0.5	0.166667	0	0.333333	0.166667
668	STAN	5	0.5	-0.501784	-0.117943	-0.309339	-0.310388	-0.639247	-0.185729	-0.178594	0.333333	0.5	0.166667	0	0.333333	0.166667
417	STAN	2	0.5	0.498216	-0.117943	-0.309339	-0.310388	-0.639247	-0.185729	-0.178594	0	0.333333	-0.166667	0	0.833333	0.666667
417	STAN	4	0.5	0.498216	-0.117943	-0.309339	-0.310388	-0.639247	-0.185729	-0.178594	0	0.333333	-0.166667	0	-0.166667	-0.333333
417	STAN	2	0.5	0.498216	-0.117943	-0.309339	-0.310388	-0.639247	-0.185729	-0.178594	0	0.333333	-0.166667	0	-0.166667	-0.333333
672	STAN	4	0.5	0.498216	-0.117943	-0.309339	0.689612	NA	-0.185729	-0.178594	0	0	-0.166667	0	0	0.166667
672	STAN	2	0.5	0.498216	-0.117943	-0.309339	0.689612	NA	-0.185729	-0.178594	0	0	-0.166667	0	1	0.166667
672	STAN	4	0.5	0.498216	-0.117943	-0.309339	0.689612	NA	-0.185729	-0.178594	0	0	-0.166667	0	1	1.16667
304	STAN	4	0.5	-0.501784	-0.117943	-0.309339	0.689612	0.360753	-0.185729	-0.178594	0	0	-0.2	-0.166667	-0.166667	-0.333333
304	STAN	4	0.5	-0.501784	-0.117943	-0.309339	0.689612	0.360753	-0.185729	-0.178594	0	0	-0.2	-0.166667	-0.166667	-0.333333
304	STAN	3	0.5	-0.501784	-0.117943	-0.309339	0.689612	0.360753	-0.185729	-0.178594	0	0	NA	-0.166667	0.833333	0.666667
749	STAN	1	0.5	-0.501784	-0.117943	0.690661	0.689612	0.360753	-0.185729	-0.178594	0.2	-0.2	0	0	1.66667	1.5
749	STAN	4	0.5	-0.501784	-0.117943	0.690661	0.689612	0.360753	-0.185729	-0.178594	0.2	-0.2	0	0	-1.33333	-1.5
749	STAN	6	0.5	-0.501784	-0.117943	0.690661	0.689612	0.360753	-0.185729	-0.178594	0.2	-0.2	0	0	-1.33333	-1.5
673	STAN	4	0.5	-0.501784	-0.117943	-0.309339	0.689612	-0.639247	-0.185729	-0.178594	0.333333	0	0	0	1.5	0.5
673	STAN	5	0.5	-0.501784	-0.117943	-0.309339	0.689612	-0.639247	-0.185729	-0.178594	0.333333	0	0	0	1.5	0.5
673	STAN	4	0.5	-0.501784	-0.117943	-0.309339	0.689612	-0.639247	-0.185729	-0.178594	0.333333	0	0	0	-0.5	-1.5
186	STAN	6	0.5	-0.501784	-0.117943	-0.309339	0.689612	0.360753	0.814271	-0.178594	0.5	-0.166667	-0.833333	0	1.33333	0
186	STAN	7	0.5	-0.501784	-0.117943	-0.309339	0.689612	0.360753	0.814271	-0.178594	-0.5	-0.166667	0.166667	0	-1.66667	-1
186	STAN	7	0.5	-0.501784	-0.117943	-0.309339	0.689612	0.360753	0.814271	-0.178594	0.5	-0.166667	0.166667	0	0.333333	0
677	STAN	2	0.5	-0.501784	-0.117943	-0.309339	0.689612	0.360753	0.814271	0.821406	-0.833333	0.833333	0.333333	-0.166667	1.16667	0.5
677	STAN	5	0.5	-0.501784	-0.117943	-0.309339	0.689612	0.360753	0.814271	0.821406	0.166667	-0.166667	0.333333	0.833333	0.166667	-0.5
677	STAN	5	0.5	-0.501784	-0.117943	-0.309339	0.689612	0.360753	0.814271	0.821406	0.166667	-0.166667	0.333333	-0.166667	0.166667	1.5
653	STAN	2	0.5	0.498216	-0.117943	-0.309339	-0.310388	0.360753	-0.185729	-0.178594	0	0	0.5	0	0.333333	0.5
653	STAN	3	0.5	0.498216	-0.117943	-0.309339	-0.310388	0.360753	-0.185729	-0.178594	0	0	0.5	0	-0.666667	0.5
653	STAN	2	0.5	0.498216	-0.117943	-0.309339	-0.310388	0.360753	-0.185729	-0.178594	0	0	0.5	0	1.33333	0.5
250	STAN	6	0.5	-0.501784	-0.117943	0.690661	-0.310388	0.360753	-0.185729	0.821406	-0.166667	0	-0.166667	0	-1.83333	-0.166667
250	STAN	3	0.5	-0.501784	-0.117943	0.690661	-0.310388	0.360753	-0.185729	0.821406	-0.166667	0	-0.166667	0	1.16667	-0.166667
250	STAN	5	0.5	-0.501784	-0.117943	0.690661	-0.310388	0.360753	-0.185729	0.821406	0.833333	0	-0.166667	0	0.166667	-0.166667
188	STAN	4	0.5	-0.501784	-0.117943	-0.309339	0.689612	-0.639247	-0.185729	-0.178594	-0.5	0.166667	0	0	0	0.166667
188	STAN	4	0.5	-0.501784	-0.117943	-0.309339	0.689612	-0.639247	-0.185729	-0.178594	0.5	0.166667	0	0	0	0.166667
188	STAN	3	0.5	-0.501784	-0.117943	-0.309339	0.689612	-0.639247	-0.185729	-0.178594	0.5	0.166667	0	0	0	0.166667
483	STAN	5	0.5	0.498216	-0.117943	-0.309339	-0.310388	-0.639247	0.814271	-0.178594	NA	0.5	0.333333	0	-1.16667	-0.666667
483	STAN	3	0.5	0.498216	-0.117943	-0.309339	-0.310388	-0.639247	0.814271	-0.178594	0	0.5	0.333333	0	0.833333	0.333333
483	STAN	5	0.5	0.498216	-0.117943	-0.309339	-0.310388	-0.639247	0.814271	-0.178594	0	0.5	0.333333	0	0.833333	0.333333
609	STAN	5	0.5	-0.501784	-0.117943	-0.309339	-0.310388	0.360753	-0.185729	0.821406	-0.333333	0	0.666667	0	-1.33333	0
609	STAN	5	0.5	-0.501784	-0.117943	-0.309339	-0.310388	0.360753	-0.185729	0.821406	0.666667	0	-0.333333	0	1.66667	0
609	STAN	6	0.5	-0.501784	-0.117943	-0.309339	-0.310388	0.360753	-0.185729	0.821406	0.666667	0	-0.333333	0	0.666667	0
743	STAN	5	0.5	0.498216	-0.117943	0.690661	-0.310388	0.360753	-0.185729	-0.178594	0	0	-0.5	0	0.666667	0.166667
743	STAN	4	0.5	0.498216	-0.117943	0.690661	-0.310388	0.360753	-0.185729	-0.178594	0	0	-0.5	0	-1.33333	-1.83333
743	STAN	4	0.5	0.498216	-0.117943	0.690661	-0.310388	0.360753	-0.185729	-0.178594	0	0	-0.5	0	1.66667	1.16667
211	STAN	5	0.5	0.498216	-0.117943	-0.309339	0.689612	-0.639247	-0.185729	-0.178594	0	0.2	0	0	-0.166667	0.5
211	STAN	2	0.5	0.498216	-0.117943	-0.309339	0.689612	-0.639247	-0.185729	-0.178594	0	0.2	0	0	0.833333	0.5
211	STAN	5	0.5	0.498216	-0.117943	-0.309339	0.689612	-0.639247	-0.185729	-0.178594	0	0.2	0	0	-0.166667	0.5
428	STAN	2	0.5	0.498216	-0.117943	0.690661	0.689612	0.360753	-0.185729	-0.178594	0	0	-0.166667	0	-0.333333	-0.333333
428	STAN	6	0.5	0.498216	-0.117943	0.690661	0.689612	0.360753	-0.185729	-0.178594	0	0	-0.166667	0	-0.333333	-0.333333
428	STAN	4	0.5	0.498216	-0.117943	0.690661	0.689612	0.360753	-0.185729	-0.178594	0	0	0.833333	0	-0.333333	0.666667
420	STAN	2	0.5	-0.501784	-0.117943	-0.309339	0.689612	-0.639247	-0.185729	-0.178594	-0.6	0.166667	0	0	0.5	1
420	STAN	2	0.5	-0.501784	-0.117943	-0.309339	0.689612	-0.639247	-0.185729	-0.178594	0.4	0.166667	0	0	-0.5	-1
420	STAN	2	0.5	-0.501784	-0.117943	-0.309339	0.689612	-0.639247	-0.185729	-0.178594	NA	0.166667	0	0	0.5	1
327	STAN	6	0.5	-0.501784	-0.117943	-0.309339	-0.310388	0.360753	-0.185729	-0.178594	0	0.833333	0	0	-1	-1.83333
327	STAN	5	0.5	-0.501784	-0.117943	-0.309339	-0.310388	0.360753	-0.185729	-0.178594	0	-0.166667	0	0	1	1.16667
327	STAN	7	0.5	-0.501784	-0.117943	-0.309339	-0.310388	0.360753	-0.185729	-0.178594	0	-0.166667	0	0	NA	0.166667
285	STAN	5	0.5	-0.501784	-0.117943	-0.309339	0.689612	-0.639247	-0.185729	-0.178594	-0.166667	0.166667	0	0	0.333333	0.2
285	STAN	5	0.5	-0.501784	-0.117943	-0.309339	0.689612	-0.639247	-0.185729	-0.178594	-0.166667	0.166667	0	0	-1.66667	-0.8
285	STAN	3	0.5	-0.501784	-0.117943	-0.309339	0.689612	-0.639247	-0.185729	-0.178594	-0.166667	0.166667	0	0	0.333333	0.2
394	STAN	2	0.5	-0.501784	-0.117943	0.690661	-0.310388	0.360753	-0.185729	-0.178594	0.833333	0	0.333333	0	0.666667	0.666667
394	STAN	3	0.5	-0.501784	-0.117943	0.690661	-0.310388	0.360753	-0.185729	-0.178594	-0.166667	0	0.333333	0	-0.333333	-0.333333
394	STAN	2	0.5	-0.501784	-0.117943	0.690661	-0.310388	0.360753	-0.185729	-0.178594	-0.166667	0	0.333333	0	0.666667	0.666667
641	STAN	6	0.5	0.498216	-0.117943	-0.309339	-0.310388	0.360753	0.814271	-0.178594	0	-0.166667	0.666667	0	0.833333	0.333333
641	STAN	4	0.5	0.498216	-0.117943	-0.309339	-0.310388	0.360753	0.814271	-0.178594	0	-0.166667	-0.333333	0	-0.166667	0.333333
641	STAN	5	0.5	0.498216	-0.117943	-0.309339	-0.310388	0.360753	0.814271	-0.178594	0	0.833333	0.666667	0	-1.16667	-1.66667
314	STAN	5	0.5	0.498216	-0.117943	-0.309339	-0.310388	0.360753	-0.185729	-0.178594	0	0	0	0	0.166667	0.833333
314	STAN	6	0.5	0.498216	-0.117943	-0.309339	-0.310388	0.360753	-0.185729	-0.178594	0	0	NA	0	0.166667	0.833333
314	STAN	3	0.5	0.498216	-0.117943	-0.309339	-0.310388	0.360753	-0.185729	-0.178594	0	0	0	0	0.166667	0.833333
403	STAN	3	0.5	-0.501784	-0.117943	-0.309339	-0.310388	0.360753	-0.185729	-0.178594	0.5	0	0	0	-0.333333	0.6
403	STAN	4	0.5	-0.501784	-0.117943	-0.309339	-0.310388	0.360753	-0.185729	-0.178594	0.5	0	0	0	0.666667	NA
403	STAN	2	0.5	-0.501784	-0.117943	-0.309339	-0.310388	0.360753	-0.185729	-0.178594	0.5	0	0	0	0.666667	0.6
664	STAN	4	0.5	-0.501784	-0.117943	-0.309339	0.689612	-0.639247	-0.185729	-0.178594	-0.166667	0.166667	0	0	-0.166667	0.333333
664	STAN	5	0.5	-0.501784	-0.117943	-0.309339	0.689612	-0.639247	-0.185729	-0.178594	-0.166667	0.166667	0	0	0.833333	0.333333
664	STAN	4	0.5	-0.501784	-0.117943	-0.309339	0.689612	-0.639247	-0.185729	-0.178594	0.833333	0.166667	0	0	-0.166667	0.333333
242	STAN	4	0.5	0.498216	0.882057	-0.309339	-0.310388	-0.639247	-0.185729	-0.178594	0	0.166667	0	0	-1	-0.166667
242	STAN	4	0.5	0.498216	0.882057	-0.309339	-0.310388	-0.639247	-0.185729	-0.178594	0	0.166667	0	0	1	-0.166667
242	STAN	3	0.5	0.498216	0.882057	-0.309339	-0.310388	-0.639247	-0.185729	-0.178594	0	0.166667	0	0	1	0.833333
489	STAN	5	0.5	0.498216	-0.117943	-0.309339	-0.310388	-0.639247	-0.185729	-0.178594	0	0.166667	-0.166667	0	0.666667	0
489	STAN	3	0.5	0.498216	-0.117943	-0.309339	-0.310388	-0.639247	-0.185729	-0.178594	0	0.166667	-0.166667	0	-1.33333	0
489	STAN	5	0.5	0.498216	-0.117943	-0.309339	-0.310388	-0.639247	-0.185729	-0.178594	0	0.166667	0.833333	0	0.666667	0
293	STAN	2	0.5	-0.501784	-0.117943	-0.309339	-0.310388	0.360753	-0.185729	-0.178594	-0.166667	-0.166667	-0.166667	0	0.5	0
293	STAN	2	0.5	-0.501784	-0.117943	-0.309339	-0.310388	0.360753	-0.185729	-0.178594	-0.166667	-0.166667	-0.166667	0	-0.5	0
293	STAN	3	0.5	-0.501784	-0.117943	-0.309339	-0.310388	0.360753	-0.185729	-0.178594	-0.166667	-0.166667	-0.166667	0	0.5	1
671	STAN	1	0.5	-0.501784	-0.117943	-0.309339	-0.310388	0.360753	0.814271	-0.178594	0.4	0	0.333333	0	0.333333	0.333333
671	STAN	5	0.5	-0.501784	-0.117943	-0.309339	-0.310388	0.360753	0.814271	-0.178594	0.4	0	0.333333	0	-1.66667	-1.66667
671	STAN	4	0.5	-0.501784	-0.117943	-0.309339	-0.310388	0.360753	0.814271	-0.178594	0.4	0	0.333333	0	0.333333	0.333333
388	STAN	2	0.5	0.498216	0.882057	0.690661	-0.310388	0.360753	-0.185729	-0.178594	0	0	0	0	1	0.5
388	STAN	2	0.5	0.498216	0.882057	0.690661	-0.310388	0.360753	-0.185729	-0.178594	0	0	0	0	0	-0.5
388	STAN	2	0.5	0.498216	0.882057	0.690661	-0.310388	0.360753	-0.185729	-0.178594	0	0	0	0	0	-0.5
171	STAN	2	0.5	0.498216	-0.117943	0.690661	-0.310388	0.360753	-0.185729	-0.178594	0	-0.166667	0	0	1.33333	0
171	STAN	2	0.5	0.498216	-0.117943	0.690661	-0.310388	0.360753	-0.185729	-0.178594	0	-0.166667	NA	0	0.333333	0
171	STAN	5	0.5	0.498216	-0.117943	0.690661	-0.310388	0.360753	-0.185729	-0.178594	0	-0.166667	0	0	-1.66667	0
168	STAN	4	0.5	-0.501784	-0.117943	-0.309339	-0.310388	0.360753	-0.185729	-0.178594	0.8	-0.2	0.666667	0	-0.166667	-0.166667
168	STAN	4	0.5	-0.501784	-0.117943	-0.309339	-0.310388	0.360753	-0.185729	-0.178594	-0.2	-0.2	NA	0	-1.16667	-1.16667
168	STAN	2	0.5	-0.501784	-0.117943	-0.309339	-0.310388	0.360753	-0.185729	-0.178594	-0.2	-0.2	NA	0	0.833333	0.833333
463	STAN	4	0.5	0.498216	-0.117943	-0.309339	0.689612	-0.639247	-0.185729	-0.178594	0	0	-0.666667	0	-1.33333	-0.333333
463	STAN	2	0.5	0.498216	-0.117943	-0.309339	0.689612	-0.639247	-0.185729	-0.178594	0	0	0.333333	0	0.666667	-0.333333
463	STAN	8	0.5	0.498216	-0.117943	-0.309339	0.689612	-0.639247	-0.185729	-0.178594	0	0	0.333333	0	-0.333333	-0.333333
266	STAN	3	0.5	0.498216	-0.117943	0.690661	-0.310388	-0.639247	-0.185729	-0.178594	0	0	0	0	0.333333	-0.166667
266	STAN	2	0.5	0.498216	-0.117943	0.690661	-0.310388	-0.639247	-0.185729	-0.178594	0	0	0	0	0.333333	-0.166667
266	STAN	4	0.5	0.498216	-0.117943	0.690661	-0.310388	-0.639247	-0.185729	-0.178594	0	0	0	NA	0.333333	-0.166667
634	STAN	2	0.5	-0.501784	-0.117943	-0.309339	0.689612	-0.639247	0.814271	-0.178594	0.5	0	0	0	0.666667	1
634	STAN	5	0.5	-0.501784	-0.117943	-0.309339	0.689612	-0.639247	0.814271	-0.178594	-0.5	0	0	0	-0.333333	-1
634	STAN	4	0.5	-0.501784	-0.117943	-0.309339	0.689612	-0.639247	0.814271	-0.178594	-0.5	0	0	0	-0.333333	0
117	STAN	1	0.5	0.498216	-0.117943	-0.309339	-0.310388	0.360753	-0.185729	-0.178594	0	-0.166667	0	0	-0.666667	-0.666667
117	STAN	2	0.5	0.498216	-0.117943	-0.309339	-0.310388	0.360753	-0.185729	-0.178594	0	-0.166667	0	0	0.333333	0.333333
117	STAN	2	0.5	0.498216	-0.117943	-0.309339	-0.310388	0.360753	-0.185729	-0.178594	0	-0.166667	0	0	0.333333	0.333333
404	STAN	3	0.5	0.498216	-0.117943	0.690661	-0.310388	-0.639247	-0.185729	-0.178594	0	0.4	0	0	1.33333	0.166667
404	STAN	5	0.5	0.498216	-0.117943	0.690661	-0.310388	-0.639247	-0.185729	-0.178594	0	0.4	0	0	-0.666667	-1.83333
404	STAN	3	0.5	0.498216	-0.117943	0.690661	-0.310388	-0.639247	-0.185729	-0.178594	0	0.4	0	0	-0.666667	0.166667
170	STAN	3	0.5	-0.501784	-0.117943	0.690661	-0.310388	-0.639247	-0.185729	-0.178594	0	0.333333	NA	0	0.666667	-0.333333
170	STAN	3	0.5	-0.501784	-0.117943	0.690661	-0.310388	-0.639247	-0.185729	-0.178594	0	0.333333	-0.25	0	-0.333333	-0.333333
170	STAN	3	0.5	-0.501784	-0.117943	0.690661	-0.310388	-0.639247	-0.185729	-0.178594	0	0.333333	NA	0	-0.333333	-0.333333
238	STAN	6	0.5	0.498216	-0.117943	-0.309339	-0.310388	0.360753	-0.185729	-0.178594	0	-0.166667	0.833333	0	-1.33333	0.333333
238	STAN	5	0.5	0.498216	-0.117943	-0.309339	-0.310388	0.360753	-0.185729	-0.178594	0	-0.166667	-0.166667	0	0.666667	0.333333
238	STAN	3	0.5	0.498216	-0.117943	-0.309339	-0.310388	0.360753	-0.185729	-0.178594	0	-0.166667	-0.166667	0	-1.33333	-0.666667
544	STAN	2	0.5	0.498216	0.882057	0.690661	-0.310388	0.360753	-0.185729	0.821406	-0.166667	-0.166667	0	0	0.833333	0
544	STAN	3	0.5	0.498216	0.882057	0.690661	-0.310388	0.360753	-0.185729	0.821406	-0.166667	-0.166667	0	0	-0.166667	0
544	STAN	3	0.5	0.498216	0.882057	0.690661	-0.310388	0.360753	-0.185729	0.821406	-0.166667	-0.166667	0	0	-0.166667	0
444	STAN	4	0.5	-0.501784	-0.117943	-0.309339	0.689612	-0.639247	-0.185729	0.821406	0	0.5	-0.2	0	0.5	1.4
444	STAN	6	0.5	-0.501784	-0.117943	-0.309339	0.689612	-0.639247	-0.185729	0.821406	0	0.5	NA	0	0.5	0.4
444	STAN	5	0.5	-0.501784	-0.117943	-0.309339	0.689612	-0.639247	-0.185729	0.821406	0	0.5	-0.2	0	0.5	0.4
245	STAN	2	0.5	0.498216	0.882057	0.690661	-0.310388	0.360753	-0.185729	-0.178594	0	0	0	0	-0.166667	-0.4
245	STAN	3	0.5	0.498216	0.882057	0.690661	-0.310388	0.360753	-0.185729	-0.178594	NA	NA	NA	NA	-1.16667	NA
245	STAN	1	0.5	0.498216	0.882057	0.690661	-0.310388	0.360753	-0.185729	-0.178594	0	0	0	0	0.833333	0.6
514	STAN	2	0.5	-0.501784	-0.117943	-0.309339	0.689612	0.360753	-0.185729	-0.178594	0.166667	0	-0.166667	0	0.166667	0
514	STAN	3	0.5	-0.501784	-0.117943	-0.309339	0.689612	0.360753	-0.185729	-0.178594	0.166667	0	-0.166667	0	1.16667	1
514	STAN	4	0.5	-0.501784	-0.117943	-0.309339	0.689612	0.360753	-0.185729	-0.178594	0.166667	0	0.833333	0	-0.833333	-1
747	STAN	5	0.5	-0.501784	-0.117943	0.690661	0.689612	-0.639247	0.814271	-0.178594	-0.833333	0	0.333333	0	0.5	-0.166667
747	STAN	7	0.5	-0.501784	-0.117943	0.690661	0.689612	-0.639247	0.814271	-0.178594	0.166667	0	0.333333	0	0.5	-0.166667
747	STAN	2	0.5	-0.501784	-0.117943	0.690661	0.689612	-0.639247	0.814271	-0.178594	0.166667	0	0.333333	0	0.5	0.833333
451	STAN	2	0.5	0.498216	-0.117943	-0.309339	-0.310388	0.360753	-0.185729	-0.178594	0	0	0	0	0.666667	1
451	STAN	3	0.5	0.498216	-0.117943	-0.309339	-0.310388	0.360753	-0.185729	-0.178594	0	0	0	0	0.666667	1
451	STAN	3	0.5	0.498216	-0.117943	-0.309339	-0.310388	0.360753	-0.185729	-0.178594	0	0	0	0	-2.33333	-2
126	STAN	3	0.5	0.498216	-0.117943	0.690661	-0.310388	-0.639247	-0.185729	-0.178594	0	0.5	0	0	0.666667	0
126	STAN	4	0.5	0.498216	-0.117943	0.690661	-0.310388	-0.639247	-0.185729	-0.178594	0	0.5	0	0	-0.333333	0
126	STAN	4	0.5	0.498216	-0.117943	0.690661	-0.310388	-0.639247	-0.185729	-0.178594	0	0.5	0	0	0.666667	0
733	STAN	4	0.5	0.498216	-0.117943	0.690661	-0.310388	-0.639247	0.814271	-0.178594	0	0.5	0.666667	0	1.33333	1.66667
733	STAN	5	0.5	0.498216	-0.117943	0.690661	-0.310388	-0.639247	0.814271	-0.178594	0	0.5	-0.333333	0	0.333333	0.666667
733	STAN	1	0.5	0.498216	-0.117943	0.690661	-0.310388	-0.639247	0.814271	-0.178594	0	0.5	0.666667	0	1.33333	1.66667
507	STAN	2	0.5	-0.501784	-0.117943	-0.309339	0.689612	-0.639247	-0.185729	-0.178594	0.833333	0	0	0	0.833333	0.666667
507	STAN	1	0.5	-0.501784	-0.117943	-0.309339	0.689612	-0.639247	-0.185729	-0.178594	-0.166667	0	0	0	-0.166667	0.666667
507	STAN	2	0.5	-0.501784	-0.117943	-0.309339	0.689612	-0.639247	-0.185729	-0.178594	-0.166667	0	0	0	-0.166667	-0.333333
303	STAN	3	0.5	-0.501784	-0.117943	-0.309339	0.689612	-0.639247	-0.185729	0.821406	0.333333	0.333333	0	0	0.5	-0.5
303	STAN	2	0.5	-0.501784	-0.117943	-0.309339	0.689612	-0.639247	-0.185729	0.821406	0.333333	0.333333	0	0	-0.5	-0.5
303	STAN	2	0.5	-0.501784	-0.117943	-0.309339	0.689612	-0.639247	-0.185729	0.821406	0.333333	0.333333	0	0	0.5	0.5
248	STAN	3	0.5	0.498216	-0.117943	0.690661	0.689612	-0.639247	-0.185729	-0.178594	0	0.166667	0.8	0	0.333333	1
248	STAN	3	0.5	0.498216	-0.117943	0.690661	0.689612	-0.639247	-0.185729	-0.178594	0	0.166667	-0.2	0	0.333333	0
248	STAN	3	0.5	0.498216	-0.117943	0.690661	0.689612	-0.639247	-0.185729	-0.178594	0	0.166667	-0.2	0	0.333333	-1
723	STAN	3	0.5	-0.501784	-0.117943	0.690661	-0.310388	0.360753	-0.185729	-0.178594	-0.166667	0	0	0	-0.666667	-0.5
723	STAN	1	0.5	-0.501784	-0.117943	0.690661	-0.310388	0.360753	-0.185729	-0.178594	-0.166667	0	0	0	0.333333	0.5
723	STAN	2	0.5	-0.501784	-0.117943	0.690661	-0.310388	0.360753	-0.185729	-0.178594	0.833333	0	0	0	0.333333	0.5
724	STAN	8	0.5	0.498216	-0.117943	0.690661	-0.310388	0.360753	-0.185729	-0.178594	0	-0.333333	NA	0	1	0.666667
724	STAN	3	0.5	0.498216	-0.117943	0.690661	-0.310388	0.360753	-0.185729	-0.178594	0	-0.333333	0	0	0	0.666667
724	STAN	2	0.5	0.498216	-0.117943	0.690661	-0.310388	0.360753	-0.185729	-0.178594	0	-0.333333	0	0	0	-0.333333
178	STAN	1	0.5	0.498216	-0.117943	-0.309339	0.689612	-0.639247	-0.185729	-0.178594	0	0.333333	0	0	0	0.5
178	STAN	1	0.5	0.498216	-0.117943	-0.309339	0.689612	-0.639247	-0.185729	-0.178594	0	0.333333	0	0	1	0.5
178	STAN	1	0.5	0.498216	-0.117943	-0.309339	0.689612	-0.639247	-0.185729	-0.178594	0	0.333333	0	0	0	0.5
447	STAN	2	0.5	0.498216	-0.117943	0.690661	0.689612	-0.639247	-0.185729	0.821406	0.833333	0.5	0.6	0	1.83333	1
447	STAN	4	0.5	0.498216	-0.117943	0.690661	0.689612	-0.639247	-0.185729	0.821406	-0.166667	0.5	0.6	0	1.83333	1
447	STAN	4	0.5	0.498216	-0.117943	0.690661	0.689612	-0.639247	-0.185729	0.821406	-0.166667	-0.5	-0.4	0	-2.16667	-2
533	STAN	3	0.5	0.498216	0.882057	0.690661	-0.310388	0.360753	-0.185729	-0.178594	0	-0.166667	0	0	-1.33333	-1.5
533	STAN	2	0.5	0.498216	0.882057	0.690661	-0.310388	0.360753	-0.185729	-0.178594	0	-0.166667	0	0	0.666667	1.5
533	STAN	3	0.5	0.498216	0.882057	0.690661	-0.310388	0.360753	-0.185729	-0.178594	0	-0.166667	0	0	0.666667	0.5
712	STAN	3	0.5	0.498216	-0.117943	-0.309339	-0.310388	0.360753	-0.185729	-0.178594	0	0	0	0	0	-0.333333
712	STAN	5	0.5	0.498216	-0.117943	-0.309339	-0.310388	0.360753	-0.185729	-0.178594	0	0	0	0	-2	-0.333333
712	STAN	5	0.5	0.498216	-0.117943	-0.309339	-0.310388	0.360753	-0.185729	-0.178594	0	0	0	0	0	-0.333333
212	STAN	2	0.5	0.498216	-0.117943	-0.309339	-0.310388	0.360753	-0.185729	-0.178594	NA	NA	NA	NA	NA	NA
212	STAN	6	0.5	0.498216	-0.117943	-0.309339	-0.310388	0.360753	-0.185729	-0.178594	0	-0.2	0.8	0	-1.6	-2.2
212	STAN	4	0.5	0.498216	-0.117943	-0.309339	-0.310388	0.360753	-0.185729	-0.178594	0	-0.2	-0.2	0	0.4	1.8
189	STAN	2	0.5	-0.501784	-0.117943	0.690661	-0.310388	0.360753	-0.185729	-0.178594	0.5	0	0	0	0.333333	0.166667
189	STAN	2	0.5	-0.501784	-0.117943	0.690661	-0.310388	0.360753	-0.185729	-0.178594	-0.5	0	0	0	1.33333	1.16667
189	STAN	3	0.5	-0.501784	-0.117943	0.690661	-0.310388	0.360753	-0.185729	-0.178594	0.5	0	0	0	0.333333	1.16667
279	STAN	3	0.5	0.498216	0.882057	0.690661	-0.310388	0.360753	-0.185729	0.821406	0	0	0	0	0	0.666667
279	STAN	3	0.5	0.498216	0.882057	0.690661	-0.310388	0.360753	-0.185729	0.821406	0	0	0	0	0	0.666667
279	STAN	3	0.5	0.498216	0.882057	0.690661	-0.310388	0.360753	-0.185729	0.821406	0	0	0	0	0	0.666667
792	STAN	6	0.5	-0.501784	-0.117943	0.690661	0.689612	-0.639247	0.814271	-0.178594	0	0.166667	0.166667	0	0.666667	0.4
792	STAN	5	0.5	-0.501784	-0.117943	0.690661	0.689612	-0.639247	0.814271	-0.178594	0	0.166667	0.166667	0	1.66667	1.4
792	STAN	6	0.5	-0.501784	-0.117943	0.690661	0.689612	-0.639247	0.814271	-0.178594	0	0.166667	0.166667	0	-1.33333	0.4
515	STAN	6	0.5	-0.501784	-0.117943	-0.309339	-0.310388	0.360753	0.814271	-0.178594	0.4	0	0.2	0	-1.8	0
515	STAN	6	0.5	-0.501784	-0.117943	-0.309339	-0.310388	0.360753	0.814271	-0.178594	0.4	0	0.2	0	0.2	0
515	STAN	5	0.5	-0.501784	-0.117943	-0.309339	-0.310388	0.360753	0.814271	-0.178594	0.4	0	0.2	0	0.2	0
594	STAN	2	0.5	-0.501784	-0.117943	-0.309339	-0.310388	0.360753	-0.185729	-0.178594	-0.166667	-0.333333	0	0	-1.83333	-0.333333
594	STAN	4	0.5	-0.501784	-0.117943	-0.309339	-0.310388	0.360753	-0.185729	-0.178594	-0.166667	0.666667	0	0	0.166667	-0.333333
594	STAN	6	0.5	-0.501784	-0.117943	-0.309339	-0.310388	0.360753	-0.185729	-0.178594	0.833333	-0.333333	0	0	0.166667	-0.333333
257	STAN	3	0.5	0.498216	-0.117943	0.690661	-0.310388	0.360753	-0.185729	-0.178594	0	0	-0.166667	-0.2	0.333333	0.333333
257	STAN	3	0.5	0.498216	-0.117943	0.690661	-0.310388	0.360753	-0.185729	-0.178594	0	0	-0.166667	-0.2	0.333333	0.333333
257	STAN	4	0.5	0.498216	-0.117943	0.690661	-0.310388	0.360753	-0.185729	-0.178594	0	0	0.833333	0.8	0.333333	0.333333
540	STAN	3	0.5	0.498216	0.882057	-0.309339	-0.310388	0.360753	-0.185729	-0.178594	0	0	0	0	0	-0.2
540	STAN	5	0.5	0.498216	0.882057	-0.309339	-0.310388	0.360753	-0.185729	-0.178594	0	0	0	0	0	-0.2
540	STAN	3	0.5	0.498216	0.882057	-0.309339	-0.310388	0.360753	-0.185729	-0.178594	0	0	0	0	0	-0.2
143	STAN	5	0.5	-0.501784	-0.117943	0.690661	-0.310388	0.360753	-0.185729	-0.178594	NA	0	0.333333	0	0	0
143	STAN	4	0.5	-0.501784	-0.117943	0.690661	-0.310388	0.360753	-0.185729	-0.178594	0	0	0.333333	0	0	-1
143	STAN	4	0.5	-0.501784	-0.117943	0.690661	-0.310388	0.360753	-0.185729	-0.178594	0	0	-0.666667	0	0	1
728	STAN	7	0.5	0.498216	-0.117943	0.690661	-0.310388	0.360753	-0.185729	0.821406	0	-0.166667	0	0	-0.5	1.16667
728	STAN	3	0.5	0.498216	-0.117943	0.690661	-0.310388	0.360753	-0.185729	0.821406	0	-0.166667	0	0	-0.5	-0.833333
728	STAN	7	0.5	0.498216	-0.117943	0.690661	-0.310388	0.360753	-0.185729	0.821406	0	-0.166667	0	0	-0.5	1.16667
297	STAN	5	0.5	-0.501784	-0.117943	-0.309339	0.689612	0.360753	-0.185729	-0.178594	0.5	-0.166667	0	0	0.833333	0.666667
297	STAN	4	0.5	-0.501784	-0.117943	-0.309339	0.689612	0.360753	-0.185729	-0.178594	0.5	-0.166667	0	0	-1.16667	-0.333333
297	STAN	6	0.5	-0.501784	-0.117943	-0.309339	0.689612	0.360753	-0.185729	-0.178594	0.5	-0.166667	0	0	-0.166667	-0.333333
441	STAN	3	0.5	-0.501784	-0.117943	-0.309339	-0.310388	0.360753	-0.185729	-0.178594	-0.333333	0	0	0	-0.166667	0.333333
441	STAN	2	0.5	-0.501784	-0.117943	-0.309339	-0.310388	0.360753	-0.185729	-0.178594	0.666667	0	0	0	0.833333	1.33333
441	STAN	5	0.5	-0.501784	-0.117943	-0.309339	-0.310388	0.360753	-0.185729	-0.178594	0.666667	0	0	0	-0.166667	0.333333
785	STAN	3	0.5	0.498216	-0.117943	0.690661	-0.310388	0.360753	-0.185729	-0.178594	0	0	0	0	-0.2	-0.4
785	STAN	2	0.5	0.498216	-0.117943	0.690661	-0.310388	0.360753	-0.185729	-0.178594	0	0	0	0	0.8	0.6
785	STAN	2	0.5	0.498216	-0.117943	0.690661	-0.310388	0.360753	-0.185729	-0.178594	0	0	NA	0	NA	NA
121	STAN	5	0.5	0.498216	-0.117943	0.690661	-0.310388	0.360753	-0.185729	-0.178594	0	0	0.6	0	-1.83333	-0.166667
121	STAN	5	0.5	0.498216	-0.117943	0.690661	-0.310388	0.360753	-0.185729	-0.178594	0	0	-0.4	0	0.166667	-0.166667
121	STAN	6	0.5	0.498216	-0.117943	0.690661	-0.310388	0.360753	-0.185729	-0.178594	0	0	-0.4	0	0.166667	-0.166667
370	STAN	3	0.5	0.498216	-0.117943	-0.309339	-0.310388	-0.639247	-0.185729	-0.178594	0	0.25	-0.166667	-0.166667	0.2	-0.166667
370	STAN	6	0.5	0.498216	-0.117943	-0.309339	-0.310388	-0.639247	-0.185729	-0.178594	0	0.25	-0.166667	-0.166667	-0.8	-0.166667
370	STAN	4	0.5	0.498216	-0.117943	-0.309339	-0.310388	-0.639247	-0.185729	-0.178594	0	NA	-0.166667	-0.166667	NA	-0.166667
471	STAN	5	0.5	-0.501784	-0.117943	-0.309339	-0.310388	-0.639247	-0.185729	0.821406	0.5	0.333333	-0.666667	0	0.166667	0.166667
471	STAN	6	0.5	-0.501784	-0.117943	-0.309339	-0.310388	-0.639247	-0.185729	0.821406	0.5	0.333333	0.333333	0	-1.83333	0.166667
471	STAN	8	0.5	-0.501784	-0.117943	-0.309339	-0.310388	-0.639247	-0.185729	0.821406	0.5	0.333333	0.333333	0	0.166667	0.166667
725	STAN	5	0.5	0.498216	-0.117943	0.690661	0.689612	0.360753	-0.185729	-0.178594	0	0	-0.25	0	-1.5	-1.5
725	STAN	3	0.5	0.498216	-0.117943	0.690661	0.689612	0.360753	-0.185729	-0.178594	0	0	0.75	0	0.5	0.5
725	STAN	5	0.5	0.498216	-0.117943	0.690661	0.689612	0.360753	-0.185729	-0.178594	0	0	NA	0	-1.5	-1.5
572	STAN	3	0.5	0.498216	0.882057	-0.309339	-0.310388	0.360753	-0.185729	-0.178594	0	-0.166667	0	0	0	0
572	STAN	3	0.5	0.498216	0.882057	-0.309339	-0.310388	0.360753	-0.185729	-0.178594	0	0.833333	0	0	0	0
572	STAN	3	0.5	0.498216	0.882057	-0.309339	-0.310388	0.360753	-0.185729	-0.178594	0	-0.166667	0	0	0	0
191	STAN	5	0.5	0.498216	-0.117943	-0.309339	-0.310388	0.360753	0.814271	0.821406	0	-0.2	0	-0.166667	0.666667	0.666667
191	STAN	6	0.5	0.498216	-0.117943	-0.309339	-0.310388	0.360753	0.814271	0.821406	0	-0.2	0	-0.166667	0.666667	0.666667
191	STAN	5	0.5	0.498216	-0.117943	-0.309339	-0.310388	0.360753	0.814271	0.821406	0	0.8	0	-0.166667	-1.33333	-1.33333
622	STAN	5	0.5	-0.501784	-0.117943	-0.309339	0.689612	-0.639247	-0.185729	-0.178594	0.5	0.333333	0.333333	-0.166667	-1.33333	-0.5
622	STAN	8	0.5	-0.501784	-0.117943	-0.309339	0.689612	-0.639247	-0.185729	-0.178594	0.5	0.333333	0.333333	-0.166667	-1.33333	-1.5
622	STAN	7	0.5	-0.501784	-0.117943	-0.309339	0.689612	-0.639247	-0.185729	-0.178594	0.5	0.333333	0.333333	-0.166667	-0.333333	-0.5
481	STAN	6	0.5	0.498216	-0.117943	-0.309339	-0.310388	0.360753	-0.185729	-0.178594	0	NA	0	0	-1	0.333333
481	STAN	3	0.5	0.498216	-0.117943	-0.309339	-0.310388	0.360753	-0.185729	-0.178594	0	-0.2	0	0	0	0.333333
481	STAN	4	0.5	0.498216	-0.117943	-0.309339	-0.310388	0.360753	-0.185729	-0.178594	0	-0.2	0	0	1	1.33333
208	STAN	3	0.5	-0.501784	-0.117943	-0.309339	0.689612	-0.639247	-0.185729	-0.178594	-0.166667	0	NA	0	0.166667	-1.66667
208	STAN	6	0.5	-0.501784	-0.117943	-0.309339	0.689612	-0.639247	-0.185729	-0.178594	-0.166667	0	-0.2	0	0.166667	0.333333
208	STAN	5	0.5	-0.501784	-0.117943	-0.309339	0.689612	-0.639247	-0.185729	-0.178594	-0.166667	0	-0.2	0	1.16667	-0.666667
269	STAN	3	0.5	0.498216	-0.117943	0.690661	-0.310388	0.360753	-0.185729	-0.178594	0	0	0	0	0.666667	-0.5
269	STAN	1	0.5	0.498216	-0.117943	0.690661	-0.310388	0.360753	-0.185729	-0.178594	0	0	0	0	-0.333333	-0.5
269	STAN	2	0.5	0.498216	-0.117943	0.690661	-0.310388	0.360753	-0.185729	-0.178594	0	0	0	0	0.666667	0.5
711	STAN	3	0.5	0.498216	-0.117943	-0.309339	-0.310388	0.360753	-0.185729	-0.178594	0	0	0.5	-0.166667	1	0.666667
711	STAN	3	0.5	0.498216	-0.117943	-0.309339	-0.310388	0.360753	-0.185729	-0.178594	0	0	-0.5	0.833333	-2	0.666667
711	STAN	8	0.5	0.498216	-0.117943	-0.309339	-0.310388	0.360753	-0.185729	-0.178594	0	0	0.5	-0.166667	1	0.666667
429	STAN	3	0.5	-0.501784	-0.117943	-0.309339	0.689612	-0.639247	-0.185729	0.821406	0	0.4	0.4	0	0.666667	0.333333
429	STAN	4	0.5	-0.501784	-0.117943	-0.309339	0.689612	-0.639247	-0.185729	0.821406	NA	NA	NA	NA	-0.333333	1.33333
429	STAN	2	0.5	-0.501784	-0.117943	-0.309339	0.689612	-0.639247	-0.185729	0.821406	0	0.4	0.4	0	0.666667	1.33333
550	STAN	4	0.5	0.498216	0.882057	0.690661	-0.310388	0.360753	-0.185729	0.821406	0	0	-0.333333	-0.166667	1.66667	1.33333
550	STAN	3	0.5	0.498216	0.882057	0.690661	-0.310388	0.360753	-0.185729	0.821406	0	0	-0.333333	-0.166667	0.666667	0.333333
550	STAN	6	0.5	0.498216	0.882057	0.690661	-0.310388	0.360753	-0.185729	0.821406	0	0	0.666667	-0.166667	-1.33333	-0.666667
203	STAN	1	0.5	0.498216	-0.117943	-0.309339	-0.310388	-0.639247	-0.185729	-0.178594	0	0.166667	0	0	0.5	0.6
203	STAN	3	0.5	0.498216	-0.117943	-0.309339	-0.310388	-0.639247	-0.185729	-0.178594	0	0.166667	0	0	-0.5	NA
203	STAN	2	0.5	0.498216	-0.117943	-0.309339	-0.310388	-0.639247	-0.185729	-0.178594	0	0.166667	0	0	0.5	0.6
556	STAN	2	0.5	-0.501784	-0.117943	0.690661	0.689612	-0.639247	-0.185729	-0.178594	0	0.166667	0	0	-0.666667	0
556	STAN	5	0.5	-0.501784	-0.117943	0.690661	0.689612	-0.639247	-0.185729	-0.178594	0	0.166667	0	0	0.333333	0
556	STAN	2	0.5	-0.501784	-0.117943	0.690661	0.689612	-0.639247	-0.185729	-0.178594	0	0.166667	0	0	0.333333	0
308	STAN	1	0.5	0.498216	-0.117943	-0.309339	-0.310388	0.360753	-0.185729	-0.178594	0	0	0	0	1	1
308	STAN	3	0.5	0.498216	-0.117943	-0.309339	-0.310388	0.360753	-0.185729	-0.178594	0	0	0	0	0	0
308	STAN	2	0.5	0.498216	-0.117943	-0.309339	-0.310388	0.360753	-0.185729	-0.178594	0	0	0	0	0	0
689	STAN	4	0.6	-0.501784	-0.117943	-0.309339	0.689612	0.360753	-0.185729	-0.178594	0.2	0	0	0	0	0
689	STAN	4	0.6	-0.501784	-0.117943	-0.309339	0.689612	0.360753	-0.185729	-0.178594	0.2	0	0	0	1	1
696	STAN	5	0.5	0.498216	-0.117943	-0.309339	0.689612	-0.639247	-0.185729	-0.178594	0	0.166667	0	0	-1.66667	-0.166667
696	STAN	1	0.5	0.498216	-0.117943	-0.309339	0.689612	-0.639247	-0.185729	-0.178594	0	0.166667	0	0	1.33333	0.833333
696	STAN	2	0.5	0.498216	-0.117943	-0.309339	0.689612	-0.639247	-0.185729	-0.178594	0	0.166667	0	0	0.333333	-0.166667
740	STAN	3	0.5	0.498216	-0.117943	0.690661	-0.310388	0.360753	-0.185729	-0.178594	0	0	-0.166667	0	1	1.16667
740	STAN	3	0.5	0.498216	-0.117943	0.690661	-0.310388	0.360753	-0.185729	-0.178594	0	0	-0.166667	0	0	0.166667
740	STAN	3	0.5	0.498216	-0.117943	0.690661	-0.310388	0.360753	-0.185729	-0.178594	0	0	-0.166667	0	1	1.16667
786	STAN	5	0.5	0.498216	0.882057	0.690661	-0.310388	0.360753	-0.185729	0.821406	0	0	0	0	-1.16667	0.833333
786	STAN	3	0.5	0.498216	0.882057	0.690661	-0.310388	0.360753	-0.185729	0.821406	0	0	0	0	0.833333	-0.166667
786	STAN	3	0.5	0.498216	0.882057	0.690661	-0.310388	0.360753	-0.185729	0.821406	0	0	0	0	1.83333	0.833333
337	STAN	4	0.5	0.498216	-0.117943	-0.309339	-0.310388	0.360753	-0.185729	-0.178594	0	-0.166667	0	0	0.333333	0.8
337	STAN	5	0.5	0.498216	-0.117943	-0.309339	-0.310388	0.360753	-0.185729	-0.178594	0	-0.166667	0	0	0.333333	-1.2
337	STAN	6	0.5	0.498216	-0.117943	-0.309339	-0.310388	0.360753	-0.185729	-0.178594	0	-0.166667	0	0	-2.66667	-1.2
780	STAN	3	0.5	-0.501784	-0.117943	0.690661	-0.310388	0.360753	-0.185729	-0.178594	0.5	-0.166667	0	0.833333	0.833333	-0.166667
780	STAN	3	0.5	-0.501784	-0.117943	0.690661	-0.310388	0.360753	-0.185729	-0.178594	-0.5	-0.166667	0	-0.166667	-0.166667	-0.166667
780	STAN	2	0.5	-0.501784	-0.117943	0.690661	-0.310388	0.360753	-0.185729	-0.178594	0.5	-0.166667	0	-0.166667	0.833333	0.833333
144	STAN	3	0.5	0.498216	-0.117943	0.690661	-0.310388	0.360753	-0.185729	-0.178594	0	0	-0.166667	0	0.666667	1.33333
144	STAN	4	0.5	0.498216	-0.117943	0.690661	-0.310388	0.360753	-0.185729	-0.178594	0	0	-0.166667	0	0.666667	-0.666667
144	STAN	4	0.5	0.498216	-0.117943	0.690661	-0.310388	0.360753	-0.185729	-0.178594	0	0	-0.166667	0	-0.333333	-0.666667
366	STAN	3	0.5	-0.501784	-0.117943	-0.309339	-0.310388	0.360753	-0.185729	-0.178594	0.5	-0.333333	0	0	1	1.5
366	STAN	5	0.5	-0.501784	-0.117943	-0.309339	-0.310388	0.360753	-0.185729	-0.178594	0.5	-0.333333	0	0	0	0.5
366	STAN	6	0.5	-0.501784	-0.117943	-0.309339	-0.310388	0.360753	-0.185729	-0.178594	0.5	-0.333333	0	0	0	-1.5
111	STAN	4	0.5	-0.501784	-0.117943	-0.309339	-0.310388	-0.639247	-0.185729	-0.178594	-0.2	0.6	-0.166667	0	0.5	0
111	STAN	3	0.5	-0.501784	-0.117943	-0.309339	-0.310388	-0.639247	-0.185729	-0.178594	0.8	0.6	-0.166667	0	1.5	0
111	STAN	6	0.5	-0.501784	-0.117943	-0.309339	-0.310388	-0.639247	-0.185729	-0.178594	-0.2	-0.4	0.833333	0	-1.5	0
701	STAN	2	0.5	-0.501784	-0.117943	-0.309339	0.689612	-0.639247	-0.185729	-0.178594	-0.166667	0.166667	0	0	0.5	0.166667
701	STAN	4	0.5	-0.501784	-0.117943	-0.309339	0.689612	-0.639247	-0.185729	-0.178594	-0.166667	0.166667	0	0	-0.5	0.166667
701	STAN	3	0.5	-0.501784	-0.117943	-0.309339	0.689612	-0.639247	-0.185729	-0.178594	-0.166667	0.166667	0	0	0.5	0.166667
698	STAN	6	0.5	-0.501784	-0.117943	-0.309339	0.689612	-0.639247	0.814271	-0.178594	0	0.5	-0.25	0	0.25	0.5
698	STAN	3	0.5	-0.501784	-0.117943	-0.309339	0.689612	-0.639247	0.814271	-0.178594	0	0.5	0.75	0	0.25	0.5
770	STAN	4	0.5	-0.501784	-0.117943	0.690661	-0.310388	0.360753	-0.185729	-0.178594	NA	NA	NA	0	0.166667	0.666667
770	STAN	3	0.5	-0.501784	-0.117943	0.690661	-0.310388	0.360753	-0.185729	-0.178594	-0.25	0	-0.2	0	1.16667	0.666667
770	STAN	4	0.5	-0.501784	-0.117943	0.690661	-0.310388	0.360753	-0.185729	-0.178594	-0.25	0	-0.2	0	0.166667	-0.333333
748	STAN	2	0.5	-0.501784	-0.117943	0.690661	-0.310388	-0.639247	-0.185729	-0.178594	-0.166667	0.5	0	0	0.833333	0
748	STAN	1	0.5	-0.501784	-0.117943	0.690661	-0.310388	-0.639247	-0.185729	-0.178594	-0.166667	0.5	0	0	0.833333	1
748	STAN	7	0.5	-0.501784	-0.117943	0.690661	-0.310388	-0.639247	-0.185729	-0.178594	-0.166667	-0.5	0	0	-3.16667	0
741	STAN	3	0.5	0.498216	-0.117943	0.690661	-0.310388	-0.639247	-0.185729	-0.178594	0	0.333333	0	0	0.333333	0.166667
741	STAN	2	0.5	0.498216	-0.117943	0.690661	-0.310388	-0.639247	-0.185729	-0.178594	0	0.333333	0	0	0.333333	0.166667
741	STAN	4	0.5	0.498216	-0.117943	0.690661	-0.310388	-0.639247	-0.185729	-0.178594	0	0.333333	0	0	-0.666667	0.166667
720	STAN	7	0.6	0.498216	0.882057	-0.309339	0.689612	-0.639247	-0.185729	0.821406	0	0	0	0	-2.8	-2.25
720	STAN	4	0.6	0.498216	0.882057	-0.309339	0.689612	-0.639247	-0.185729	0.821406	0	0	0	0	1.2	0.75
560	STAN	4	0.5	0.498216	-0.117943	0.690661	-0.310388	0.360753	-0.185729	-0.178594	0	0	0.2	0	-0.166667	0.333333
560	STAN	3	0.5	0.498216	-0.117943	0.690661	-0.310388	0.360753	-0.185729	-0.178594	0	0	0.2	0	-0.166667	0.333333
560	STAN	3	0.5	0.498216	-0.117943	0.690661	-0.310388	0.360753	-0.185729	-0.178594	0	0	0.2	0	-0.166667	0.333333
101	STAN	4	0.5	-0.501784	-0.117943	-0.309339	-0.310388	-0.639247	-0.185729	-0.178594	0.5	0.5	0.2	-0.166667	0.333333	-0.333333
101	STAN	3	0.5	-0.501784	-0.117943	-0.309339	-0.310388	-0.639247	-0.185729	-0.178594	0.5	0.5	0.2	-0.166667	0.333333	-0.333333
101	STAN	6	0.5	-0.501784	-0.117943	-0.309339	-0.310388	-0.639247	-0.185729	-0.178594	0.5	0.5	NA	-0.166667	0.333333	0.666667
311	STAN	6	0.5	-0.501784	-0.117943	-0.309339	0.689612	-0.639247	0.814271	0.821406	0.5	0	-0.5	0	-0.5	-0.166667
311	STAN	6	0.5	-0.501784	-0.117943	-0.309339	0.689612	-0.639247	0.814271	0.821406	-0.5	0	-0.5	0	0.5	-0.166667
311	STAN	3	0.5	-0.501784	-0.117943	-0.309339	0.689612	-0.639247	0.814271	0.821406	-0.5	0	0.5	0	-0.5	-0.166667
522	STAN	6	0.5	-0.501784	-0.117943	-0.309339	-0.310388	0.360753	-0.185729	0.821406	0.833333	-0.333333	-0.2	0	1	0.6
522	STAN	7	0.5	-0.501784	-0.117943	-0.309339	-0.310388	0.360753	-0.185729	0.821406	-0.166667	-0.333333	-0.2	0	-2	-1.4
522	STAN	4	0.5	-0.501784	-0.117943	-0.309339	-0.310388	0.360753	-0.185729	0.821406	-0.166667	-0.333333	-0.2	0	1	NA
317	STAN	6	0.5	-0.501784	-0.117943	-0.309339	0.689612	0.360753	-0.185729	-0.178594	0.5	0	-0.333333	0	1	0.5
317	STAN	6	0.5	-0.501784	-0.117943	-0.309339	0.689612	0.360753	-0.185729	-0.178594	-0.5	0	0.666667	0	1	-0.5
317	STAN	5	0.5	-0.501784	-0.117943	-0.309339	0.689612	0.360753	-0.185729	-0.178594	0.5	0	-0.333333	0	-1	-1.5
351	STAN	4	0.5	-0.501784	-0.117943	-0.309339	-0.310388	-0.639247	0.814271	-0.178594	0	0.166667	0	0	0.833333	0
351	STAN	2	0.5	-0.501784	-0.117943	-0.309339	-0.310388	-0.639247	0.814271	-0.178594	0	0.166667	0	0	0.833333	0
351	STAN	3	0.5	-0.501784	-0.117943	-0.309339	-0.310388	-0.639247	0.814271	-0.178594	0	0.166667	0	0	-0.166667	0
685	STAN	4	0.5	-0.501784	-0.117943	-0.309339	0.689612	-0.639247	0.814271	-0.178594	0.5	-0.4	0.5	0	-0.333333	-0.2
685	STAN	3	0.5	-0.501784	-0.117943	-0.309339	0.689612	-0.639247	0.814271	-0.178594	0.5	0.6	0.5	0	0.666667	-0.2
685	STAN	3	0.5	-0.501784	-0.117943	-0.309339	0.689612	-0.639247	0.814271	-0.178594	0.5	NA	0.5	0	-0.333333	-0.2
754	STAN	5	0.5	0.498216	-0.117943	0.690661	0.689612	0.360753	-0.185729	-0.178594	0	-0.166667	0	0	-1.66667	0
754	STAN	3	0.5	0.498216	-0.117943	0.690661	0.689612	0.360753	-0.185729	-0.178594	0	-0.166667	NA	0	0.333333	0
754	STAN	3	0.5	0.498216	-0.117943	0.690661	0.689612	0.360753	-0.185729	-0.178594	0	-0.166667	0	0	0.333333	0
769	STAN	6	0.5	-0.501784	0.882057	0.690661	-0.310388	-0.639247	-0.185729	-0.178594	0.333333	0.333333	0	0	-0.833333	-1.16667
769	STAN	4	0.5	-0.501784	0.882057	0.690661	-0.310388	-0.639247	-0.185729	-0.178594	-0.666667	0.333333	0	0	1.16667	0.833333
769	STAN	4	0.5	-0.501784	0.882057	0.690661	-0.310388	-0.639247	-0.185729	-0.178594	0.333333	0.333333	0	0	-0.833333	-1.16667
215	STAN	5	0.5	0.498216	-0.117943	-0.309339	-0.310388	0.360753	0.814271	0.821406	0	0	0.333333	0	1.16667	1
215	STAN	6	0.5	0.498216	-0.117943	-0.309339	-0.310388	0.360753	0.814271	0.821406	0	0	0.333333	0	-0.833333	-1
215	STAN	6	0.5	0.498216	-0.117943	-0.309339	-0.310388	0.360753	0.814271	0.821406	0	0	0.333333	0	-0.833333	1
167	STAN	9	0.5	-0.501784	-0.117943	-0.309339	-0.310388	0.360753	-0.185729	0.821406	0.5	0	0	-0.166667	-0.666667	2
167	STAN	7	0.5	-0.501784	-0.117943	-0.309339	-0.310388	0.360753	-0.185729	0.821406	-0.5	0	0	-0.166667	0.333333	-1
167	STAN	6	0.5	-0.501784	-0.117943	-0.309339	-0.310388	0.360753	-0.185729	0.821406	0.5	0	0	-0.166667	0.333333	-1
326	STAN	7	0.5	-0.501784	-0.117943	-0.309339	-0.310388	-0.639247	-0.185729	0.821406	0.6	0	0.6	0	0	0.333333
326	STAN	7	0.5	-0.501784	-0.117943	-0.309339	-0.310388	-0.639247	-0.185729	0.821406	-0.4	0	0.6	0	0	0.333333
326	STAN	5	0.5	-0.501784	-0.117943	-0.309339	-0.310388	-0.639247	-0.185729	0.821406	0.6	0	-0.4	0	0	0.333333
791	STAN	2	0.5	-0.501784	-0.117943	0.690661	0.689612	0.360753	0.814271	-0.178594	0.5	-0.5	0.833333	0	0.666667	0.833333
791	STAN	3	0.5	-0.501784	-0.117943	0.690661	0.689612	0.360753	0.814271	-0.178594	0.5	-0.5	-0.166667	0	0.666667	-0.166667
791	STAN	8	0.5	-0.501784	-0.117943	0.690661	0.689612	0.360753	0.814271	-0.178594	-0.5	0.5	-0.166667	0	0.666667	0.833333
382	STAN	4	0.5	0.498216	0.882057	0.690661	-0.310388	-0.639247	-0.185729	-0.178594	0	0	0	0	NA	-1
382	STAN	3	0.5	0.498216	0.882057	0.690661	-0.310388	-0.639247	-0.185729	-0.178594	0	0	0	0	-1	0
382	STAN	3	0.5	0.498216	0.882057	0.690661	-0.310388	-0.639247	-0.185729	-0.178594	0	0	0	0	0	1
520	STAN	1	0.5	0.498216	-0.117943	-0.309339	-0.310388	-0.639247	-0.185729	-0.178594	0	-0.333333	-0.166667	0	1	1
520	STAN	3	0.5	0.498216	-0.117943	-0.309339	-0.310388	-0.639247	-0.185729	-0.178594	0	0.666667	-0.166667	0	1	0
520	STAN	3	0.5	0.498216	-0.117943	-0.309339	-0.310388	-0.639247	-0.185729	-0.178594	0	0.666667	0.833333	0	NA	0
476	STAN	4	0.5	0.498216	-0.117943	-0.309339	-0.310388	-0.639247	0.814271	-0.178594	0	0.333333	0.5	0	0.333333	0.833333
476	STAN	6	0.5	0.498216	-0.117943	-0.309339	-0.310388	-0.639247	0.814271	-0.178594	0	0.333333	0.5	0	-0.666667	-0.166667
476	STAN	3	0.5	0.498216	-0.117943	-0.309339	-0.310388	-0.639247	0.814271	-0.178594	0	0.333333	0.5	0	-1.66667	0.833333
123	STAN	4	0.5	-0.501784	-0.117943	0.690661	0.689612	-0.639247	-0.185729	-0.178594	0.166667	0.166667	NA	0	0.166667	-0.333333
123	STAN	2	0.5	-0.501784	-0.117943	0.690661	0.689612	-0.639247	-0.185729	-0.178594	0.166667	0.166667	0.6	0	1.16667	0.666667
123	STAN	3	0.5	-0.501784	-0.117943	0.690661	0.689612	-0.639247	-0.185729	-0.178594	0.166667	0.166667	-0.4	0	0.166667	-0.333333
96	STAN	6	0.5	-0.501784	-0.117943	-0.309339	-0.310388	0.360753	0.814271	-0.178594	0	-0.2	-0.666667	0	0.5	-0.166667
96	STAN	5	0.5	-0.501784	-0.117943	-0.309339	-0.310388	0.360753	0.814271	-0.178594	0	-0.2	0.333333	0	0.5	-0.166667
96	STAN	5	0.5	-0.501784	-0.117943	-0.309339	-0.310388	0.360753	0.814271	-0.178594	0	-0.2	-0.666667	0	-1.5	-0.166667
592	STAN	1	0.5	-0.501784	-0.117943	0.690661	-0.310388	0.360753	-0.185729	-0.178594	0	-0.166667	0	0	0.5	0.333333
592	STAN	2	0.5	-0.501784	-0.117943	0.690661	-0.310388	0.360753	-0.185729	-0.178594	0	-0.166667	0	0	0.5	0.333333
592	STAN	1	0.5	-0.501784	-0.117943	0.690661	-0.310388	0.360753	-0.185729	-0.178594	0	-0.166667	0	0	0.5	0.333333
195	STAN	4	0.5	-0.501784	-0.117943	-0.309339	-0.310388	0.360753	-0.185729	-0.178594	0.5	0	0	0	1.33333	0.666667
195	STAN	5	0.5	-0.501784	-0.117943	-0.309339	-0.310388	0.360753	-0.185729	-0.178594	-0.5	0	0	0	-1.66667	-0.333333
195	STAN	3	0.5	-0.501784	-0.117943	-0.309339	-0.310388	0.360753	-0.185729	-0.178594	0.5	0	0	0	1.33333	0.666667
363	STAN	3	0.5	0.498216	-0.117943	-0.309339	-0.310388	0.360753	-0.185729	-0.178594	0	0	-0.333333	0	0.666667	0.833333
363	STAN	7	0.5	0.498216	-0.117943	-0.309339	-0.310388	0.360753	-0.185729	-0.178594	0	0	-0.333333	0	0.666667	0.833333
363	STAN	2	0.5	0.498216	-0.117943	-0.309339	-0.310388	0.360753	-0.185729	-0.178594	0	0	0.666667	0	0.666667	-0.166667
480	STAN	5	0.5	0.498216	-0.117943	-0.309339	-0.310388	-0.639247	-0.185729	-0.178594	0	0.333333	0	0	1	0.666667
480	STAN	6	0.5	0.498216	-0.117943	-0.309339	-0.310388	-0.639247	-0.185729	-0.178594	0	0.333333	0	0	-1	1.66667
480	STAN	5	0.5	0.498216	-0.117943	-0.309339	-0.310388	-0.639247	-0.185729	-0.178594	0	0.333333	0	0	-1	-1.33333
272	STAN	5	0.5	0.498216	-0.117943	-0.309339	-0.310388	-0.639247	-0.185729	-0.178594	0	0.2	-0.2	0	1	1
272	STAN	2	0.5	0.498216	-0.117943	-0.309339	-0.310388	-0.639247	-0.185729	-0.178594	0	0.2	-0.2	0	1	1
272	STAN	1	0.5	0.498216	-0.117943	-0.309339	-0.310388	-0.639247	-0.185729	-0.178594	0	0.2	-0.2	0	0	0
722	STAN	4	0.5	0.498216	-0.117943	0.690661	0.689612	0.360753	-0.185729	0.821406	0	0	0.5	-0.5	1.16667	0.666667
722	STAN	8	0.5	0.498216	-0.117943	0.690661	0.689612	0.360753	-0.185729	0.821406	0	0	0.5	0.5	-0.833333	1.66667
722	STAN	3	0.5	0.498216	-0.117943	0.690661	0.689612	0.360753	-0.185729	0.821406	0	0	0.5	-0.5	2.16667	0.666667
776	STAN	6	0.5	-0.501784	-0.117943	0.690661	-0.310388	0.360753	-0.185729	-0.178594	0.833333	0	-0.166667	0	-0.833333	0
776	STAN	5	0.5	-0.501784	-0.117943	0.690661	-0.310388	0.360753	-0.185729	-0.178594	-0.166667	0	0.833333	0	-0.833333	1
776	STAN	5	0.5	-0.501784	-0.117943	0.690661	-0.310388	0.360753	-0.185729	-0.178594	-0.166667	0	-0.166667	0	0.166667	-1
136	STAN	4	0.5	0.498216	0.882057	-0.309339	-0.310388	0.360753	-0.185729	-0.178594	0	0	0	0	-1.2	-1.2
136	STAN	7	0.5	0.498216	0.882057	-0.309339	-0.310388	0.360753	-0.185729	-0.178594	0	0	0	0	0.8	0.8
136	STAN	5	0.5	0.498216	0.882057	-0.309339	-0.310388	0.360753	-0.185729	-0.178594	0	0	0	0	0.8	0.8
707	STAN	2	0.5	0.498216	-0.117943	-0.309339	0.689612	-0.639247	-0.185729	-0.178594	0	0.166667	0	0	-0.166667	0.333333
707	STAN	4	0.5	0.498216	-0.117943	-0.309339	0.689612	-0.639247	-0.185729	-0.178594	0	0.166667	0	0	0.833333	0.333333
707	STAN	4	0.5	0.498216	-0.117943	-0.309339	0.689612	-0.639247	-0.185729	-0.178594	0	0.166667	0	0	0.833333	0.333333
449	STAN	2	0.5	0.498216	-0.117943	-0.309339	0.689612	0.360753	-0.185729	-0.178594	0	0	-0.166667	0	0.5	0.333333
449	STAN	3	0.5	0.498216	-0.117943	-0.309339	0.689612	0.360753	-0.185729	-0.178594	0	0	-0.166667	0	0.5	0.333333
449	STAN	3	0.5	0.498216	-0.117943	-0.309339	0.689612	0.360753	-0.185729	-0.178594	0	0	0.833333	0	-0.5	0.333333
120	STAN	4	0.5	0.498216	-0.117943	0.690661	-0.310388	0.360753	0.814271	0.821406	0	0	0.5	0	0.333333	0.5
120	STAN	5	0.5	0.498216	-0.117943	0.690661	-0.310388	0.360753	0.814271	0.821406	0	0	-0.5	0	1.33333	0.5
120	STAN	6	0.5	0.498216	-0.117943	0.690661	-0.310388	0.360753	0.814271	0.821406	0	0	0.5	0	-0.666667	-1.5
232	STAN	2	0.5	-0.501784	-0.117943	-0.309339	-0.310388	0.360753	-0.185729	-0.178594	0.333333	0	0	0	1	0.5
232	STAN	4	0.5	-0.501784	-0.117943	-0.309339	-0.310388	0.360753	-0.185729	-0.178594	0.333333	0	0	0	1	0.5
232	STAN	4	0.5	-0.501784	-0.117943	-0.309339	-0.310388	0.360753	-0.185729	-0.178594	0.333333	0	0	0	0	0.5
183	STAN	4	0.5	0.498216	-0.117943	-0.309339	0.689612	-0.639247	-0.185729	-0.178594	-0.166667	0.5	0	0	-0.5	0.166667
183	STAN	6	0.5	0.498216	-0.117943	-0.309339	0.689612	-0.639247	-0.185729	-0.178594	-0.166667	0.5	0	0	0.5	0.166667
183	STAN	4	0.5	0.498216	-0.117943	-0.309339	0.689612	-0.639247	-0.185729	-0.178594	-0.166667	0.5	0	0	-0.5	0.166667
373	STAN	1	0.5	-0.501784	-0.117943	-0.309339	-0.310388	0.360753	-0.185729	-0.178594	0.333333	0	0	0	1	1.16667
373	STAN	2	0.5	-0.501784	-0.117943	-0.309339	-0.310388	0.360753	-0.185729	-0.178594	0.333333	0	0	0	1	0.166667
373	STAN	4	0.5	-0.501784	-0.117943	-0.309339	-0.310388	0.360753	-0.185729	-0.178594	0.333333	0	0	0	-2	-1.83333
736	STAN	4	0.5	-0.501784	-0.117943	0.690661	0.689612	-0.639247	0.814271	-0.178594	0.333333	0.166667	0	0	-1.33333	-1.33333
736	STAN	6	0.5	-0.501784	-0.117943	0.690661	0.689612	-0.639247	0.814271	-0.178594	0.333333	0.166667	0	0	0.666667	-1.33333
736	STAN	7	0.5	-0.501784	-0.117943	0.690661	0.689612	-0.639247	0.814271	-0.178594	0.333333	0.166667	NA	0	0.666667	0.666667
353	STAN	6	0.5	-0.501784	-0.117943	-0.309339	0.689612	-0.639247	-0.185729	-0.178594	0.333333	0	0	0	0.5	0.166667
353	STAN	6	0.5	-0.501784	-0.117943	-0.309339	0.689612	-0.639247	-0.185729	-0.178594	0.333333	0	0	0	-1.5	-0.833333
353	STAN	4	0.5	-0.501784	-0.117943	-0.309339	0.689612	-0.639247	-0.185729	-0.178594	-0.666667	0	0	0	0.5	1.16667
324	STAN	2	0.4	-0.501784	-0.117943	-0.309339	-0.310388	0.360753	0.814271	-0.178594	-0.2	0	0.5	0	0	0
324	STAN	5	0.4	-0.501784	-0.117943	-0.309339	-0.310388	0.360753	0.814271	-0.178594	-0.2	0	-0.5	0	0	0
324	STAN	8	0.4	-0.501784	-0.117943	-0.309339	-0.310388	0.360753	0.814271	-0.178594	-0.2	0	NA	0	0	0
590	STAN	3	0.5	-0.501784	-0.117943	0.690661	-0.310388	0.360753	-0.185729	-0.178594	0.833333	0	-0.333333	0	0.833333	0
590	STAN	5	0.5	-0.501784	-0.117943	0.690661	-0.310388	0.360753	-0.185729	-0.178594	-0.166667	0	-0.333333	0	-0.166667	0
590	STAN	4	0.5	-0.501784	-0.117943	0.690661	-0.310388	0.360753	-0.185729	-0.178594	-0.166667	0	0.666667	0	-0.166667	0
561	STAN	1	0.5	-0.501784	0.882057	0.690661	-0.310388	0.360753	-0.185729	-0.178594	0.166667	0	0	0	0.333333	0
561	STAN	2	0.5	-0.501784	0.882057	0.690661	-0.310388	0.360753	-0.185729	-0.178594	0.166667	0	0	0	-0.666667	0
561	STAN	4	0.5	-0.501784	0.882057	0.690661	-0.310388	0.360753	-0.185729	-0.178594	0.166667	0	0	0	0.333333	0
631	STAN	6	0.5	-0.501784	-0.117943	-0.309339	0.689612	0.360753	0.814271	-0.178594	0.666667	0	0	0	0.166667	0.833333
631	STAN	4	0.5	-0.501784	-0.117943	-0.309339	0.689612	0.360753	0.814271	-0.178594	0.666667	0	0	0	0.166667	-0.166667
631	STAN	6	0.5	-0.501784	-0.117943	-0.309339	0.689612	0.360753	0.814271	-0.178594	-0.333333	0	0	0	-0.833333	-1.16667
400	STAN	3	0.5	0.498216	-0.117943	-0.309339	-0.310388	-0.639247	-0.185729	-0.178594	0	0.166667	-0.166667	0	1.16667	0.8
400	STAN	5	0.5	0.498216	-0.117943	-0.309339	-0.310388	-0.639247	-0.185729	-0.178594	0	0.166667	-0.166667	0	-1.83333	-1.2
400	STAN	2	0.5	0.498216	-0.117943	-0.309339	-0.310388	-0.639247	-0.185729	-0.178594	0	0.166667	-0.166667	0	1.16667	0.8
113	STAN	7	0.5	0.498216	-0.117943	-0.309339	-0.310388	-0.639247	0.814271	0.821406	0	0.5	0.166667	0.166667	1	-0.8
113	STAN	7	0.5	0.498216	-0.117943	-0.309339	-0.310388	-0.639247	0.814271	0.821406	0	0.5	0.166667	0.166667	-2	1.2
113	STAN	6	0.5	0.498216	-0.117943	-0.309339	-0.310388	-0.639247	0.814271	0.821406	0	0.5	0.166667	0.166667	0	0.2
154	STAN	4	0.5	-0.501784	-0.117943	-0.309339	0.689612	-0.639247	-0.185729	-0.178594	0.166667	0.5	0	0	-0.166667	-0.166667
154	STAN	2	0.5	-0.501784	-0.117943	-0.309339	0.689612	-0.639247	-0.185729	-0.178594	0.166667	0.5	0	0	-0.166667	-0.166667
154	STAN	3	0.5	-0.501784	-0.117943	-0.309339	0.689612	-0.639247	-0.185729	-0.178594	0.166667	-0.5	0	0	-0.166667	-0.166667
412	STAN	3	0.5	-0.501784	-0.117943	0.690661	-0.310388	-0.639247	-0.185729	-0.178594	0.5	0.333333	0.5	0	0.666667	-0.166667
412	STAN	4	0.5	-0.501784	-0.117943	0.690661	-0.310388	-0.639247	-0.185729	-0.178594	0.5	0.333333	-0.5	0	0.666667	-0.166667
412	STAN	4	0.5	-0.501784	-0.117943	0.690661	-0.310388	-0.639247	-0.185729	-0.178594	-0.5	0.333333	0.5	0	0.666667	-0.166667
633	STAN	2	0.5	0.498216	-0.117943	-0.309339	-0.310388	0.360753	-0.185729	-0.178594	0	0	-0.166667	0	1.5	1
633	STAN	3	0.5	0.498216	-0.117943	-0.309339	-0.310388	0.360753	-0.185729	-0.178594	0	0	-0.166667	0	0.5	0
633	STAN	2	0.5	0.498216	-0.117943	-0.309339	-0.310388	0.360753	-0.185729	-0.178594	0	0	-0.166667	0	1.5	0
585	STAN	2	0.5	-0.501784	-0.117943	0.690661	-0.310388	-0.639247	-0.185729	-0.178594	-0.5	0.333333	-0.166667	0	0	-0.166667
585	STAN	2	0.5	-0.501784	-0.117943	0.690661	-0.310388	-0.639247	-0.185729	-0.178594	0.5	0.333333	-0.166667	0	0	-0.166667
585	STAN	2	0.5	-0.501784	-0.117943	0.690661	-0.310388	-0.639247	-0.185729	-0.178594	0.5	0.333333	-0.166667	0	1	-0.166667
763	STAN	2	0.5	-0.501784	-0.117943	-0.309339	0.689612	0.360753	-0.185729	-0.178594	-0.166667	-0.333333	0	0	0.833333	0.833333
763	STAN	4	0.5	-0.501784	-0.117943	-0.309339	0.689612	0.360753	-0.185729	-0.178594	-0.166667	-0.333333	0	0	-0.166667	-0.166667
763	STAN	4	0.5	-0.501784	-0.117943	-0.309339	0.689612	0.360753	-0.185729	-0.178594	-0.166667	-0.333333	0	0	-0.166667	-0.166667
484	STAN	5	0.5	0.498216	-0.117943	-0.309339	-0.310388	0.360753	-0.185729	-0.178594	0	-0.333333	-0.166667	0	0.333333	0.5
484	STAN	4	0.5	0.498216	-0.117943	-0.309339	-0.310388	0.360753	-0.185729	-0.178594	0	-0.333333	-0.166667	0	1.33333	1.5
484	STAN	6	0.5	0.498216	-0.117943	-0.309339	-0.310388	0.360753	-0.185729	-0.178594	0	-0.333333	-0.166667	0	-1.66667	-1.5
524	STAN	1	0.5	0.498216	-0.117943	-0.309339	-0.310388	0.360753	-0.185729	-0.178594	0	-0.333333	0.666667	0	0.833333	1
524	STAN	4	0.5	0.498216	-0.117943	-0.309339	-0.310388	0.360753	-0.185729	-0.178594	0	-0.333333	0.666667	0	-0.166667	NA
524	STAN	1	0.5	0.498216	-0.117943	-0.309339	-0.310388	0.360753	-0.185729	-0.178594	0	-0.333333	-0.333333	0	-0.166667	0
746	STAN	3	0.5	-0.501784	-0.117943	0.690661	0.689612	0.360753	-0.185729	-0.178594	0.4	0	0	0	0.333333	0.333333
746	STAN	2	0.5	-0.501784	-0.117943	0.690661	0.689612	0.360753	-0.185729	-0.178594	0.4	0	0	0	-2.66667	-1.66667
746	STAN	2	0.5	-0.501784	-0.117943	0.690661	0.689612	0.360753	-0.185729	-0.178594	0.4	0	0	0	1.33333	1.33333
267	STAN	7	0.5	-0.501784	-0.117943	0.690661	-0.310388	0.360753	-0.185729	0.821406	0	0	-0.166667	-0.5	0.333333	-0.666667
267	STAN	7	0.5	-0.501784	-0.117943	0.690661	-0.310388	0.360753	-0.185729	0.821406	0	0	-0.166667	-0.5	0.333333	-0.666667
267	STAN	8	0.5	-0.501784	-0.117943	0.690661	-0.310388	0.360753	-0.185729	0.821406	0	0	-0.166667	0.5	0.333333	-0.666667
750	STAN	4	0.5	0.498216	-0.117943	0.690661	-0.310388	0.360753	-0.185729	-0.178594	0.833333	-0.166667	0	0	-1	-0.166667
750	STAN	4	0.5	0.498216	-0.117943	0.690661	-0.310388	0.360753	-0.185729	-0.178594	-0.166667	-0.166667	0	0	0	-0.166667
750	STAN	4	0.5	0.498216	-0.117943	0.690661	-0.310388	0.360753	-0.185729	-0.178594	-0.166667	-0.166667	0	0	0	-0.166667
322	STAN	6	0.5	0.498216	-0.117943	-0.309339	-0.310388	0.360753	0.814271	-0.178594	0	-0.166667	-0.5	0	0.5	0.166667
322	STAN	4	0.5	0.498216	-0.117943	-0.309339	-0.310388	0.360753	0.814271	-0.178594	0	-0.166667	0.5	0	0.5	-0.833333
322	STAN	3	0.5	0.498216	-0.117943	-0.309339	-0.310388	0.360753	0.814271	-0.178594	0	-0.166667	0.5	0	0.5	0.166667
423	STAN	3	0.5	0.498216	0.882057	0.690661	0.689612	0.360753	-0.185729	-0.178594	0	-0.166667	0	0	-0.166667	0
423	STAN	3	0.5	0.498216	0.882057	0.690661	0.689612	0.360753	-0.185729	-0.178594	0	-0.166667	0	0	0.833333	1
423	STAN	8	0.5	0.498216	0.882057	0.690661	0.689612	0.360753	-0.185729	-0.178594	0	-0.166667	0	0	-1.16667	-2
135	STAN	4	0.5	0.498216	-0.117943	0.690661	-0.310388	0.360753	-0.185729	-0.178594	0	-0.166667	-0.166667	0	-0.166667	-0.166667
135	STAN	2	0.5	0.498216	-0.117943	0.690661	-0.310388	0.360753	-0.185729	-0.178594	0	-0.166667	-0.166667	0	0.833333	0.833333
135	STAN	3	0.5	0.498216	-0.117943	0.690661	-0.310388	0.360753	-0.185729	-0.178594	0	-0.166667	-0.166667	0	-0.166667	-0.166667
637	STAN	6	0.5	-0.501784	-0.117943	-0.309339	0.689612	-0.639247	-0.185729	-0.178594	0	0	-0.166667	0	0.5	0.166667
637	STAN	4	0.5	-0.501784	-0.117943	-0.309339	0.689612	-0.639247	-0.185729	-0.178594	0	0	-0.166667	0	0.5	0.166667
637	STAN	2	0.5	-0.501784	-0.117943	-0.309339	0.689612	-0.639247	-0.185729	-0.178594	0	0	-0.166667	0	0.5	0.166667
607	STAN	2	0.5	-0.501784	-0.117943	-0.309339	0.689612	0.360753	-0.185729	-0.178594	0.5	-0.166667	-0.166667	0	0.833333	0.666667
607	STAN	3	0.5	-0.501784	-0.117943	-0.309339	0.689612	0.360753	-0.185729	-0.178594	0.5	-0.166667	-0.166667	0	0.833333	0.666667
607	STAN	7	0.5	-0.501784	-0.117943	-0.309339	0.689612	0.360753	-0.185729	-0.178594	0.5	-0.166667	-0.166667	0	-0.166667	-0.333333
439	STAN	4	0.5	0.498216	-0.117943	-0.309339	-0.310388	0.360753	-0.185729	-0.178594	0	-0.166667	-0.166667	0	0.166667	0
439	STAN	4	0.5	0.498216	-0.117943	-0.309339	-0.310388	0.360753	-0.185729	-0.178594	0	-0.166667	-0.166667	0	0.166667	0
439	STAN	3	0.5	0.498216	-0.117943	-0.309339	-0.310388	0.360753	-0.185729	-0.178594	0	-0.166667	-0.166667	0	0.166667	0
99	STAN	8	0.5	0.498216	-0.117943	-0.309339	-0.310388	0.360753	-0.185729	-0.178594	0	0	-0.333333	0	-0.666667	0.833333
99	STAN	2	0.5	0.498216	-0.117943	-0.309339	-0.310388	0.360753	-0.185729	-0.178594	0	0	-0.333333	0	0.333333	0.833333
99	STAN	3	0.5	0.498216	-0.117943	-0.309339	-0.310388	0.360753	-0.185729	-0.178594	0	0	-0.333333	0	0.333333	0.833333
360	STAN	5	0.5	-0.501784	-0.117943	-0.309339	0.689612	0.360753	0.814271	0.821406	0.166667	-0.5	0.833333	-0.5	-1.33333	-1.33333
360	STAN	4	0.5	-0.501784	-0.117943	-0.309339	0.689612	0.360753	0.814271	0.821406	0.166667	-0.5	-0.166667	0.5	0.666667	0.666667
360	STAN	4	0.5	-0.501784	-0.117943	-0.309339	0.689612	0.360753	0.814271	0.821406	0.166667	-0.5	-0.166667	-0.5	0.666667	0.666667
546	STAN	5	0.5	-0.501784	-0.117943	0.690661	-0.310388	0.360753	-0.185729	-0.178594	0.666667	-0.333333	0.5	0	-2.16667	-0.5
546	STAN	7	0.5	-0.501784	-0.117943	0.690661	-0.310388	0.360753	-0.185729	-0.178594	-0.333333	0.666667	-0.5	0	-1.16667	0.5
546	STAN	3	0.5	-0.501784	-0.117943	0.690661	-0.310388	0.360753	-0.185729	-0.178594	0.666667	-0.333333	-0.5	0	0.833333	0.5
495	STAN	5	0.5	0.498216	-0.117943	-0.309339	-0.310388	0.360753	-0.185729	-0.178594	0	0	0	0	0	-0.333333
495	STAN	4	0.5	0.498216	-0.117943	-0.309339	-0.310388	0.360753	-0.185729	-0.178594	0	0	0	0	1	0.666667
495	STAN	4	0.5	0.498216	-0.117943	-0.309339	-0.310388	0.360753	-0.185729	-0.178594	0	0	0	0	0	0.666667
276	STAN	4	0.5	-0.501784	-0.117943	-0.309339	0.689612	-0.639247	-0.185729	-0.178594	0.166667	0.166667	0	0	0.166667	0.5
276	STAN	5	0.5	-0.501784	-0.117943	-0.309339	0.689612	-0.639247	-0.185729	-0.178594	0.166667	0.166667	0	0	-1.83333	-1.5
276	STAN	3	0.5	-0.501784	-0.117943	-0.309339	0.689612	-0.639247	-0.185729	-0.178594	0.166667	0.166667	0	0	1.16667	0.5
538	STAN	4	0.5	0.498216	-0.117943	0.690661	-0.310388	0.360753	0.814271	-0.178594	0	-0.166667	0.333333	0	-1.83333	-1
538	STAN	2	0.5	0.498216	-0.117943	0.690661	-0.310388	0.360753	0.814271	-0.178594	0	-0.166667	0.333333	0	0.166667	0
538	STAN	4	0.5	0.498216	-0.117943	0.690661	-0.310388	0.360753	0.814271	-0.178594	0	-0.166667	0.333333	0	0.166667	0
719	STAN	4	0.5	0.498216	-0.117943	0.690661	-0.310388	0.360753	-0.185729	-0.178594	0	-0.166667	0	0	0.333333	1.16667
719	STAN	7	0.5	0.498216	-0.117943	0.690661	-0.310388	0.360753	-0.185729	-0.178594	0	-0.166667	0	0	-1.66667	-0.833333
719	STAN	7	0.5	0.498216	-0.117943	0.690661	-0.310388	0.360753	-0.185729	-0.178594	0	-0.166667	0	0	-1.66667	-0.833333
124	STAN	2	0.5	0.498216	0.882057	-0.309339	0.689612	0.360753	-0.185729	-0.178594	0	-0.333333	-0.166667	0	0.5	1.16667
124	STAN	2	0.5	0.498216	0.882057	-0.309339	0.689612	0.360753	-0.185729	-0.178594	0	-0.333333	-0.166667	0	0.5	1.16667
124	STAN	2	0.5	0.498216	0.882057	-0.309339	0.689612	0.360753	-0.185729	-0.178594	0	-0.333333	-0.166667	0	-0.5	0.166667
371	STAN	3	0.5	0.498216	-0.117943	0.690661	-0.310388	0.360753	-0.185729	0.821406	0	-0.166667	0	-0.166667	0.333333	0
371	STAN	5	0.5	0.498216	-0.117943	0.690661	-0.310388	0.360753	-0.185729	0.821406	0	-0.166667	0	-0.166667	0.333333	0
371	STAN	4	0.5	0.498216	-0.117943	0.690661	-0.310388	0.360753	-0.185729	0.821406	0	-0.166667	0	-0.166667	0.333333	-1
152	STAN	7	0.5	0.498216	-0.117943	-0.309339	-0.310388	0.360753	-0.185729	-0.178594	0	-0.333333	0.666667	0	-1	0.333333
152	STAN	7	0.5	0.498216	-0.117943	-0.309339	-0.310388	0.360753	-0.185729	-0.178594	0	-0.333333	-0.333333	0	-1	-1.66667
152	STAN	4	0.5	0.498216	-0.117943	-0.309339	-0.310388	0.360753	-0.185729	-0.178594	0	-0.333333	-0.333333	0	2	1.33333
283	STAN	4	0.5	0.498216	-0.117943	0.690661	-0.310388	-0.639247	-0.185729	-0.178594	0	0.4	0	0	-1.66667	-0.666667
283	STAN	4	0.5	0.498216	-0.117943	0.690661	-0.310388	-0.639247	-0.185729	-0.178594	0	0.4	0	0	0.333333	0.333333
283	STAN	2	0.5	0.498216	-0.117943	0.690661	-0.310388	-0.639247	-0.185729	-0.178594	0	0.4	0	0	1.33333	1.33333
756	STAN	4	0.5	-0.501784	-0.117943	0.690661	-0.310388	-0.639247	-0.185729	-0.178594	0.5	0.333333	0.333333	0	0	0.333333
756	STAN	6	0.5	-0.501784	-0.117943	0.690661	-0.310388	-0.639247	-0.185729	-0.178594	0.5	0.333333	-0.666667	0	1	0.333333
756	STAN	3	0.5	-0.501784	-0.117943	0.690661	-0.310388	-0.639247	-0.185729	-0.178594	-0.5	0.333333	0.333333	0	1	0.333333
216	STAN	3	0.5	0.498216	-0.117943	-0.309339	-0.310388	0.360753	-0.185729	-0.178594	0	-0.166667	0	0	0.333333	0.666667
216	STAN	3	0.5	0.498216	-0.117943	-0.309339	-0.310388	0.360753	-0.185729	-0.178594	0	-0.166667	0	0	-0.666667	-0.333333
216	STAN	2	0.5	0.498216	-0.117943	-0.309339	-0.310388	0.360753	-0.185729	-0.178594	0	-0.166667	0	0	0.333333	-0.333333
142	STAN	4	0.5	0.498216	-0.117943	0.690661	-0.310388	NA	-0.185729	-0.178594	0	0	0	-0.166667	0.833333	0.5
142	STAN	4	0.5	0.498216	-0.117943	0.690661	-0.310388	NA	-0.185729	-0.178594	0	0	0	-0.166667	-1.16667	1.5
142	STAN	2	0.5	0.498216	-0.117943	0.690661	-0.310388	NA	-0.185729	-0.178594	0	0	0	-0.166667	0.833333	-0.5
128	STAN	5	0.5	0.498216	-0.117943	0.690661	-0.310388	-0.639247	-0.185729	-0.178594	0	0.333333	0	0	0	0.5
128	STAN	3	0.5	0.498216	-0.117943	0.690661	-0.310388	-0.639247	-0.185729	-0.178594	0	0.333333	0	0	0	0.5
128	STAN	2	0.5	0.498216	-0.117943	0.690661	-0.310388	-0.639247	-0.185729	-0.178594	0	0.333333	0	0	1	1.5
745	STAN	4	0.5	-0.501784	0.882057	-0.309339	-0.310388	0.360753	-0.185729	-0.178594	0	0	0	-0.166667	-0.166667	0.5
745	STAN	3	0.5	-0.501784	0.882057	-0.309339	-0.310388	0.360753	-0.185729	-0.178594	0	0	0	-0.166667	-0.166667	0.5
745	STAN	2	0.5	-0.501784	0.882057	-0.309339	-0.310388	0.360753	-0.185729	-0.178594	0	0	0	-0.166667	-0.166667	0.5
344	STAN	5	0.5	-0.501784	-0.117943	-0.309339	-0.310388	0.360753	-0.185729	-0.178594	0.333333	-0.166667	0.5	-0.166667	0.833333	1.16667
344	STAN	5	0.5	-0.501784	-0.117943	-0.309339	-0.310388	0.360753	-0.185729	-0.178594	0.333333	-0.166667	-0.5	-0.166667	-0.166667	0.166667
344	STAN	6	0.5	-0.501784	-0.117943	-0.309339	-0.310388	0.360753	-0.185729	-0.178594	0.333333	-0.166667	0.5	-0.166667	-0.166667	-0.833333
328	STAN	4	0.5	-0.501784	-0.117943	-0.309339	-0.310388	0.360753	-0.185729	0.821406	NA	NA	0.5	-0.166667	0.833333	0.5
328	STAN	4	0.5	-0.501784	-0.117943	-0.309339	-0.310388	0.360753	-0.185729	0.821406	0.4	0	0.5	-0.166667	0.833333	0.5
328	STAN	5	0.5	-0.501784	-0.117943	-0.309339	-0.310388	0.360753	-0.185729	0.821406	0.4	0	-0.5	-0.166667	0.833333	0.5
679	STAN	5	0.5	-0.501784	-0.117943	-0.309339	-0.310388	0.360753	-0.185729	-0.178594	0.166667	0.833333	0	0	0	0.166667
679	STAN	3	0.5	-0.501784	-0.117943	-0.309339	-0.310388	0.360753	-0.185729	-0.178594	0.166667	-0.166667	0	0	1	0.166667
679	STAN	4	0.5	-0.501784	-0.117943	-0.309339	-0.310388	0.360753	-0.185729	-0.178594	0.166667	-0.166667	0	0	0	-0.833333
275	STAN	2	0.5	-0.501784	-0.117943	-0.309339	0.689612	-0.639247	-0.185729	-0.178594	0.5	0.333333	0	0	-0.333333	-0.333333
275	STAN	3	0.5	-0.501784	-0.117943	-0.309339	0.689612	-0.639247	-0.185729	-0.178594	0.5	0.333333	0	0	-0.333333	-0.333333
275	STAN	3	0.5	-0.501784	-0.117943	-0.309339	0.689612	-0.639247	-0.185729	-0.178594	0.5	0.333333	0	0	-0.333333	-0.333333
228	STAN	4	0.5	-0.501784	-0.117943	-0.309339	0.689612	-0.639247	0.814271	-0.178594	-0.166667	0.5	0.166667	0	-0.166667	-0.333333
228	STAN	4	0.5	-0.501784	-0.117943	-0.309339	0.689612	-0.639247	0.814271	-0.178594	0.833333	0.5	0.166667	0	0.833333	0.666667
228	STAN	2	0.5	-0.501784	-0.117943	-0.309339	0.689612	-0.639247	0.814271	-0.178594	-0.166667	0.5	0.166667	0	-0.166667	-0.333333
569	STAN	6	0.5	-0.501784	-0.117943	0.690661	0.689612	-0.639247	-0.185729	0.821406	0.833333	0.333333	0.666667	0	-2	-0.166667
569	STAN	5	0.5	-0.501784	-0.117943	0.690661	0.689612	-0.639247	-0.185729	0.821406	-0.166667	0.333333	-0.333333	0	0	-1.16667
569	STAN	5	0.5	-0.501784	-0.117943	0.690661	0.689612	-0.639247	-0.185729	0.821406	-0.166667	0.333333	0.666667	0	0	-0.166667
738	STAN	4	0.5	0.498216	-0.117943	0.690661	-0.310388	-0.639247	-0.185729	-0.178594	0	0.333333	-0.5	0	0.333333	0.5
738	STAN	3	0.5	0.498216	-0.117943	0.690661	-0.310388	-0.639247	-0.185729	-0.178594	0	0.333333	0.5	0	0.333333	0.5
738	STAN	2	0.5	0.498216	-0.117943	0.690661	-0.310388	-0.639247	-0.185729	-0.178594	0	0.333333	0.5	0	1.33333	1.5
375	STAN	3	0.5	0.498216	-0.117943	0.690661	-0.310388	-0.639247	-0.185729	-0.178594	0	0.5	0	0.833333	-1.5	-1.66667
375	STAN	5	0.5	0.498216	-0.117943	0.690661	-0.310388	-0.639247	-0.185729	-0.178594	0	0.5	0	-0.166667	-0.5	0.333333
375	STAN	5	0.5	0.498216	-0.117943	0.690661	-0.310388	-0.639247	-0.185729	-0.178594	0	0.5	0	-0.166667	-0.5	0.333333
347	STAN	4	0.5	-0.501784	-0.117943	-0.309339	0.689612	-0.639247	-0.185729	-0.178594	-0.333333	0.333333	0	0	0.333333	0.166667
347	STAN	4	0.5	-0.501784	-0.117943	-0.309339	0.689612	-0.639247	-0.185729	-0.178594	0.666667	0.333333	0	0	0.333333	0.166667
347	STAN	6	0.5	-0.501784	-0.117943	-0.309339	0.689612	-0.639247	-0.185729	-0.178594	0.666667	0.333333	0	0	1.33333	1.16667
611	STAN	2	0.5	0.498216	-0.117943	-0.309339	0.689612	0.360753	-0.185729	-0.178594	0	-0.333333	-0.166667	0	0.166667	-0.166667
611	STAN	5	0.5	0.498216	-0.117943	-0.309339	0.689612	0.360753	-0.185729	-0.178594	0	-0.333333	-0.166667	0	0.166667	-0.166667
611	STAN	3	0.5	0.498216	-0.117943	-0.309339	0.689612	0.360753	-0.185729	-0.178594	0	-0.333333	-0.166667	0	0.166667	0.833333
466	STAN	1	0.5	0.498216	-0.117943	-0.309339	0.689612	0.360753	-0.185729	-0.178594	0	0	0	0	1	1
466	STAN	3	0.5	0.498216	-0.117943	-0.309339	0.689612	0.360753	-0.185729	-0.178594	0	0	0	0	0	0
466	STAN	2	0.5	0.498216	-0.117943	-0.309339	0.689612	0.360753	-0.185729	-0.178594	0	0	0	0	1	1
166	STAN	2	0.5	-0.501784	-0.117943	0.690661	-0.310388	-0.639247	-0.185729	-0.178594	0.4	0.2	-0.166667	0	1.16667	1
166	STAN	1	0.5	-0.501784	-0.117943	0.690661	-0.310388	-0.639247	-0.185729	-0.178594	0.4	0.2	-0.166667	0	1.16667	0
166	STAN	1	0.5	-0.501784	-0.117943	0.690661	-0.310388	-0.639247	-0.185729	-0.178594	0.4	0.2	-0.166667	0	1.16667	1
490	STAN	5	0.5	0.498216	-0.117943	-0.309339	-0.310388	0.360753	-0.185729	-0.178594	0	0	-0.333333	0	0.666667	0
490	STAN	3	0.5	0.498216	-0.117943	-0.309339	-0.310388	0.360753	-0.185729	-0.178594	0	0	-0.333333	0	-0.333333	0
490	STAN	3	0.5	0.498216	-0.117943	-0.309339	-0.310388	0.360753	-0.185729	-0.178594	0	0	0.666667	0	0.666667	NA
528	STAN	2	0.5	0.498216	-0.117943	-0.309339	-0.310388	0.360753	-0.185729	-0.178594	0	0	-0.4	0	-0.333333	NA
528	STAN	2	0.5	0.498216	-0.117943	-0.309339	-0.310388	0.360753	-0.185729	-0.178594	0	0	NA	0	0.666667	0.4
528	STAN	4	0.5	0.498216	-0.117943	-0.309339	-0.310388	0.360753	-0.185729	-0.178594	0	0	-0.4	0	-0.333333	-0.6
564	STAN	3	0.5	-0.501784	0.882057	0.690661	-0.310388	0.360753	-0.185729	-0.178594	-0.5	0	0	0	0.5	0.166667
564	STAN	NA	0.5	-0.501784	0.882057	0.690661	-0.310388	0.360753	-0.185729	-0.178594	0.5	0	0	0	0.5	1.16667
564	STAN	6	0.5	-0.501784	0.882057	0.690661	-0.310388	0.360753	-0.185729	-0.178594	0.5	0	0	0	-1.5	-1.83333
487	STAN	2	0.5	-0.501784	-0.117943	-0.309339	-0.310388	0.360753	-0.185729	-0.178594	0.333333	0	0	0	-0.333333	-0.166667
487	STAN	3	0.5	-0.501784	-0.117943	-0.309339	-0.310388	0.360753	-0.185729	-0.178594	0.333333	0	NA	0	0.666667	0.833333
487	STAN	1	0.5	-0.501784	-0.117943	-0.309339	-0.310388	0.360753	-0.185729	-0.178594	0.333333	0	0	0	-0.333333	-0.166667
380	STAN	2	0.5	0.498216	0.882057	0.690661	-0.310388	-0.639247	-0.185729	-0.178594	0	0.333333	-0.166667	0	0.333333	0.5
380	STAN	4	0.5	0.498216	0.882057	0.690661	-0.310388	-0.639247	-0.185729	-0.178594	0	0.333333	-0.166667	0	-0.666667	-0.5
380	STAN	4	0.5	0.498216	0.882057	0.690661	-0.310388	-0.639247	-0.185729	-0.178594	0	0.333333	0.833333	0	-0.666667	0.5
612	STAN	4	0.5	-0.501784	-0.117943	-0.309339	0.689612	0.360753	-0.185729	0.821406	0.333333	0	0.666667	0	0.5	-0.5
612	STAN	4	0.5	-0.501784	-0.117943	-0.309339	0.689612	0.360753	-0.185729	0.821406	0.333333	0	-0.333333	0	0.5	1.5
612	STAN	7	0.5	-0.501784	-0.117943	-0.309339	0.689612	0.360753	-0.185729	0.821406	0.333333	0	0.666667	0	-2.5	-2.5
430	STAN	4	0.5	0.498216	-0.117943	-0.309339	-0.310388	-0.639247	-0.185729	-0.178594	0	0.666667	-0.166667	0	-0.166667	-0.833333
430	STAN	4	0.5	0.498216	-0.117943	-0.309339	-0.310388	-0.639247	-0.185729	-0.178594	0	0.666667	-0.166667	0	-0.166667	0.166667
430	STAN	4	0.5	0.498216	-0.117943	-0.309339	-0.310388	-0.639247	-0.185729	-0.178594	0	-0.333333	-0.166667	0	-0.166667	0.166667
782	STAN	5	0.5	0.498216	-0.117943	0.690661	-0.310388	-0.639247	-0.185729	-0.178594	0	0.333333	0	0	NA	-0.166667
782	STAN	5	0.5	0.498216	-0.117943	0.690661	-0.310388	-0.639247	-0.185729	-0.178594	0	0.333333	0	0	-2.4	-0.166667
782	STAN	7	0.5	0.498216	-0.117943	0.690661	-0.310388	-0.639247	-0.185729	-0.178594	0	0.333333	0	0	-0.4	-0.166667
109	STAN	3	0.5	0.498216	-0.117943	-0.309339	-0.310388	-0.639247	-0.185729	-0.178594	0	0.5	0	0	-1	0.166667
109	STAN	4	0.5	0.498216	-0.117943	-0.309339	-0.310388	-0.639247	-0.185729	-0.178594	0	NA	0	0	0	-0.833333
109	STAN	4	0.5	0.498216	-0.117943	-0.309339	-0.310388	-0.639247	-0.185729	-0.178594	0	0.5	0	0	0	0.166667
709	STAN	2	0.5	0.498216	-0.117943	-0.309339	0.689612	-0.639247	-0.185729	-0.178594	0	0.166667	0	-0.166667	1.16667	0.833333
709	STAN	5	0.5	0.498216	-0.117943	-0.309339	0.689612	-0.639247	-0.185729	-0.178594	0	0.166667	0	-0.166667	-0.833333	-0.166667
709	STAN	6	0.5	0.498216	-0.117943	-0.309339	0.689612	-0.639247	-0.185729	-0.178594	0	0.166667	0	-0.166667	1.16667	0.833333
261	STAN	4	0.5	-0.501784	0.882057	0.690661	0.689612	-0.639247	-0.185729	-0.178594	0	0.333333	-0.166667	0	-0.333333	0.333333
261	STAN	1	0.5	-0.501784	0.882057	0.690661	0.689612	-0.639247	-0.185729	-0.178594	0	0.333333	-0.166667	0	0.666667	0.333333
261	STAN	2	0.5	-0.501784	0.882057	0.690661	0.689612	-0.639247	-0.185729	-0.178594	0	0.333333	-0.166667	0	0.666667	1.33333
717	STAN	4	0.5	0.498216	-0.117943	0.690661	-0.310388	0.360753	-0.185729	-0.178594	0	-0.2	0	0	0	-1
717	STAN	4	0.5	0.498216	-0.117943	0.690661	-0.310388	0.360753	-0.185729	-0.178594	0	-0.2	0	0	0	1
717	STAN	2	0.5	0.498216	-0.117943	0.690661	-0.310388	0.360753	-0.185729	-0.178594	0	-0.2	0	0	0	0
475	STAN	6	0.5	0.498216	-0.117943	-0.309339	-0.310388	-0.639247	-0.185729	-0.178594	0	0.333333	0	-0.166667	-1.5	0.333333
475	STAN	3	0.5	0.498216	-0.117943	-0.309339	-0.310388	-0.639247	-0.185729	-0.178594	0	0.333333	0	-0.166667	1.5	1.33333
475	STAN	4	0.5	0.498216	-0.117943	-0.309339	-0.310388	-0.639247	-0.185729	-0.178594	0	0.333333	0	-0.166667	0.5	0.333333
424	STAN	3	0.5	0.498216	-0.117943	-0.309339	0.689612	0.360753	-0.185729	-0.178594	0	0	0	0	1.83333	0.833333
424	STAN	5	0.5	0.498216	-0.117943	-0.309339	0.689612	0.360753	-0.185729	-0.178594	0	0	0	0	-1.16667	-0.166667
424	STAN	3	0.5	0.498216	-0.117943	-0.309339	0.689612	0.360753	-0.185729	-0.178594	0	0	0	0	0.833333	-0.166667
628	STAN	4	0.5	0.498216	-0.117943	-0.309339	-0.310388	-0.639247	-0.185729	-0.178594	0	0.5	0.333333	0	-0.166667	-0.166667
628	STAN	3	0.5	0.498216	-0.117943	-0.309339	-0.310388	-0.639247	-0.185729	-0.178594	0	-0.5	0.333333	0	-0.166667	-0.166667
628	STAN	4	0.5	0.498216	-0.117943	-0.309339	-0.310388	-0.639247	-0.185729	-0.178594	0	0.5	-0.666667	0	-0.166667	-0.166667
559	STAN	4	0.5	-0.501784	-0.117943	0.690661	-0.310388	0.360753	-0.185729	-0.178594	0.5	-0.166667	-0.333333	0	1.16667	1
559	STAN	4	0.5	-0.501784	-0.117943	0.690661	-0.310388	0.360753	-0.185729	-0.178594	-0.5	-0.166667	-0.333333	0	-1.83333	-1
559	STAN	5	0.5	-0.501784	-0.117943	0.690661	-0.310388	0.360753	-0.185729	-0.178594	0.5	-0.166667	-0.333333	0	-0.833333	-1
343	STAN	5	0.4	-0.501784	-0.117943	-0.309339	-0.310388	0.360753	0.814271	0.821406	-0.2	0	0.25	0	0	1
343	STAN	5	0.4	-0.501784	-0.117943	-0.309339	-0.310388	0.360753	0.814271	0.821406	-0.2	0	0.25	0	0	0
343	STAN	3	0.4	-0.501784	-0.117943	-0.309339	-0.310388	0.360753	0.814271	0.821406	-0.2	0	NA	0	0	0
286	STAN	5	0.5	0.498216	-0.117943	-0.309339	-0.310388	-0.639247	-0.185729	-0.178594	0	0.333333	-0.333333	0	0	NA
286	STAN	3	0.5	0.498216	-0.117943	-0.309339	-0.310388	-0.639247	-0.185729	-0.178594	0	0.333333	-0.333333	0	1	1
286	STAN	4	0.5	0.498216	-0.117943	-0.309339	-0.310388	-0.639247	-0.185729	-0.178594	0	0.333333	-0.333333	0	1	1
104	STAN	7	0.5	0.498216	-0.117943	-0.309339	0.689612	0.360753	0.814271	-0.178594	0	-0.166667	0.4	0	-0.666667	-0.833333
104	STAN	3	0.5	0.498216	-0.117943	-0.309339	0.689612	0.360753	0.814271	-0.178594	0	-0.166667	0.4	0	0.333333	0.166667
104	STAN	3	0.5	0.498216	-0.117943	-0.309339	0.689612	0.360753	0.814271	-0.178594	0	-0.166667	-0.6	0	0.333333	0.166667
523	STAN	3	0.5	0.498216	-0.117943	-0.309339	-0.310388	0.360753	-0.185729	-0.178594	0	-0.166667	0	0	0	0.166667
523	STAN	3	0.5	0.498216	-0.117943	-0.309339	-0.310388	0.360753	-0.185729	-0.178594	0	-0.166667	0	0	0	-0.833333
523	STAN	2	0.5	0.498216	-0.117943	-0.309339	-0.310388	0.360753	-0.185729	-0.178594	0	0.833333	0	0	0	0.166667
146	STAN	2	0.5	0.498216	-0.117943	0.690661	-0.310388	-0.639247	-0.185729	-0.178594	0	0	0	0	1.5	0.5
146	STAN	4	0.5	0.498216	-0.117943	0.690661	-0.310388	-0.639247	-0.185729	-0.178594	0	0	0	0	0.5	0.5
146	STAN	3	0.5	0.498216	-0.117943	0.690661	-0.310388	-0.639247	-0.185729	-0.178594	0	0	0	0	1.5	0.5
727	STAN	1	0.5	-0.501784	-0.117943	0.690661	-0.310388	0.360753	-0.185729	-0.178594	0.6	0	0	0	0.833333	1
727	STAN	4	0.5	-0.501784	-0.117943	0.690661	-0.310388	0.360753	-0.185729	-0.178594	-0.4	0	0	0	-1.16667	0
727	STAN	1	0.5	-0.501784	-0.117943	0.690661	-0.310388	0.360753	-0.185729	-0.178594	0.6	0	0	0	0.833333	1
180	STAN	6	0.5	-0.501784	-0.117943	-0.309339	0.689612	-0.639247	-0.185729	-0.178594	0.5	0.5	-0.166667	0	-1.66667	-0.166667
180	STAN	7	0.5	-0.501784	-0.117943	-0.309339	0.689612	-0.639247	-0.185729	-0.178594	0.5	0.5	-0.166667	0	0.333333	-0.166667
180	STAN	5	0.5	-0.501784	-0.117943	-0.309339	0.689612	-0.639247	-0.185729	-0.178594	0.5	0.5	0.833333	0	-1.66667	-0.166667
198	STAN	5	0.5	-0.501784	-0.117943	-0.309339	-0.310388	0.360753	-0.185729	-0.178594	-0.166667	0	0	0	-0.833333	0
198	STAN	7	0.5	-0.501784	-0.117943	-0.309339	-0.310388	0.360753	-0.185729	-0.178594	-0.166667	0	0	0	1.16667	-2
198	STAN	7	0.5	-0.501784	-0.117943	-0.309339	-0.310388	0.360753	-0.185729	-0.178594	0.833333	0	0	0	-1.83333	1
425	STAN	4	0.5	-0.501784	-0.117943	-0.309339	0.689612	0.360753	0.814271	-0.178594	0	-0.166667	0.666667	0	0.5	-0.166667
425	STAN	2	0.5	-0.501784	-0.117943	-0.309339	0.689612	0.360753	0.814271	-0.178594	0	-0.166667	-0.333333	0	1.5	0.833333
425	STAN	3	0.5	-0.501784	-0.117943	-0.309339	0.689612	0.360753	0.814271	-0.178594	0	-0.166667	0.666667	0	0.5	-0.166667
134	STAN	8	0.5	-0.501784	-0.117943	0.690661	0.689612	0.360753	-0.185729	-0.178594	0	0	0	-0.166667	1	0.166667
134	STAN	4	0.5	-0.501784	-0.117943	0.690661	0.689612	0.360753	-0.185729	-0.178594	0	0	0	-0.166667	-1	-1.83333
134	STAN	7	0.5	-0.501784	-0.117943	0.690661	0.689612	0.360753	-0.185729	-0.178594	0	0	0	-0.166667	1	1.16667
767	STAN	6	0.5	0.498216	-0.117943	0.690661	-0.310388	0.360753	-0.185729	0.821406	0	0	-0.166667	-0.166667	-1.16667	-0.5
767	STAN	3	0.5	0.498216	-0.117943	0.690661	-0.310388	0.360753	-0.185729	0.821406	0	0	-0.166667	-0.166667	0.833333	0.5
767	STAN	4	0.5	0.498216	-0.117943	0.690661	-0.310388	0.360753	-0.185729	0.821406	0	0	-0.166667	-0.166667	0.833333	0.5
287	STAN	4	0.5	-0.501784	-0.117943	-0.309339	-0.310388	0.360753	-0.185729	-0.178594	-0.166667	0	0.833333	0	0.833333	0.666667
287	STAN	5	0.5	-0.501784	-0.117943	-0.309339	-0.310388	0.360753	-0.185729	-0.178594	0.833333	0	-0.166667	0	0.833333	1.66667
287	STAN	4	0.5	-0.501784	-0.117943	-0.309339	-0.310388	0.360753	-0.185729	-0.178594	-0.166667	0	-0.166667	0	0.833333	0.666667
513	STAN	4	0.5	-0.501784	-0.117943	-0.309339	0.689612	-0.639247	0.814271	-0.178594	0.5	0	0.333333	0	-0.166667	-0.333333
513	STAN	3	0.5	-0.501784	-0.117943	-0.309339	0.689612	-0.639247	0.814271	-0.178594	0.5	0	0.333333	0	0.833333	0.666667
513	STAN	4	0.5	-0.501784	-0.117943	-0.309339	0.689612	-0.639247	0.814271	-0.178594	0.5	0	0.333333	0	-0.166667	-0.333333
453	STAN	3	0.5	0.498216	-0.117943	-0.309339	-0.310388	-0.639247	-0.185729	-0.178594	0	0.333333	0.666667	0	-0.166667	0.5
453	STAN	6	0.5	0.498216	-0.117943	-0.309339	-0.310388	-0.639247	-0.185729	-0.178594	0	0.333333	-0.333333	0	0.833333	-1.5
453	STAN	5	0.5	0.498216	-0.117943	-0.309339	-0.310388	-0.639247	-0.185729	-0.178594	0	0.333333	-0.333333	0	-0.166667	0.5
264	STAN	2	0.5	-0.501784	-0.117943	0.690661	0.689612	0.360753	0.814271	-0.178594	0.666667	0	0	0	0.2	0
264	STAN	7	0.5	-0.501784	-0.117943	0.690661	0.689612	0.360753	0.814271	-0.178594	0.666667	0	0	0	-1.8	0
264	STAN	7	0.5	-0.501784	-0.117943	0.690661	0.689612	0.360753	0.814271	-0.178594	-0.333333	0	0	0	0.2	0
563	STAN	2	0.5	0.498216	0.882057	-0.309339	-0.310388	NA	-0.185729	-0.178594	0	0	0	0	1.33333	0.5
563	STAN	5	0.5	0.498216	0.882057	-0.309339	-0.310388	NA	-0.185729	-0.178594	0	0	0	0	-0.666667	-0.5
563	STAN	7	0.5	0.498216	0.882057	-0.309339	-0.310388	NA	-0.185729	-0.178594	0	0	0	0	-0.666667	-0.5
766	STAN	5	0.5	0.498216	-0.117943	-0.309339	-0.310388	0.360753	-0.185729	-0.178594	0	0	0	0	0.5	0.166667
766	STAN	3	0.5	0.498216	-0.117943	-0.309339	-0.310388	0.360753	-0.185729	-0.178594	0	0	0	0	1.5	1.16667
766	STAN	4	0.5	0.498216	-0.117943	-0.309339	-0.310388	0.360753	-0.185729	-0.178594	0	0	0	0	-1.5	-0.833333
650	STAN	5	0.5	-0.501784	-0.117943	-0.309339	-0.310388	0.360753	0.814271	0.821406	0	0	0	-0.166667	0	0.5
650	STAN	6	0.5	-0.501784	-0.117943	-0.309339	-0.310388	0.360753	0.814271	0.821406	0	0	0	-0.166667	-1	-1.5
650	STAN	3	0.5	-0.501784	-0.117943	-0.309339	-0.310388	0.360753	0.814271	0.821406	0	0	0	0.833333	0	0.5
681	STAN	3	0.5	-0.501784	-0.117943	-0.309339	-0.310388	0.360753	0.814271	-0.178594	0.5	0	0.333333	0	-2.16667	-2.5
681	STAN	7	0.5	-0.501784	-0.117943	-0.309339	-0.310388	0.360753	0.814271	-0.178594	-0.5	0	0.333333	0	-1.16667	0.5
681	STAN	3	0.5	-0.501784	-0.117943	-0.309339	-0.310388	0.360753	0.814271	-0.178594	0.5	0	0.333333	0	0.833333	0.5
302	STAN	3	0.5	-0.501784	-0.117943	0.690661	0.689612	-0.639247	-0.185729	-0.178594	0	0	0	0	1	1.16667
302	STAN	6	0.5	-0.501784	-0.117943	0.690661	0.689612	-0.639247	-0.185729	-0.178594	0	0	0	0	0	0.166667
302	STAN	3	0.5	-0.501784	-0.117943	0.690661	0.689612	-0.639247	-0.185729	-0.178594	0	0	0	0	0	-0.833333
229	STAN	5	0.5	0.498216	-0.117943	-0.309339	-0.310388	0.360753	-0.185729	0.821406	0	-0.166667	0.166667	0	-1	0.333333
229	STAN	2	0.5	0.498216	-0.117943	-0.309339	-0.310388	0.360753	-0.185729	0.821406	0	-0.166667	0.166667	0	1	1.33333
229	STAN	3	0.5	0.498216	-0.117943	-0.309339	-0.310388	0.360753	-0.185729	0.821406	0	-0.166667	0.166667	0	0	0.333333
511	STAN	8	0.5	-0.501784	-0.117943	-0.309339	-0.310388	0.360753	-0.185729	0.821406	0.6	0	0	-0.166667	0	1.33333
511	STAN	5	0.5	-0.501784	-0.117943	-0.309339	-0.310388	0.360753	-0.185729	0.821406	-0.4	0	0	-0.166667	1	0.333333
511	STAN	7	0.5	-0.501784	-0.117943	-0.309339	-0.310388	0.360753	-0.185729	0.821406	-0.4	0	0	-0.166667	-1	1.33333
416	STAN	3	0.5	-0.501784	0.882057	0.690661	-0.310388	-0.639247	-0.185729	-0.178594	0.5	0	0	0	-0.5	0
416	STAN	3	0.5	-0.501784	0.882057	0.690661	-0.310388	-0.639247	-0.185729	-0.178594	-0.5	0	0	0	1.5	0
416	STAN	4	0.5	-0.501784	0.882057	0.690661	-0.310388	-0.639247	-0.185729	-0.178594	-0.5	0	0	0	-0.5	0
752	STAN	2	0.5	-0.501784	-0.117943	0.690661	-0.310388	0.360753	-0.185729	-0.178594	-0.333333	0	0	0	-0.333333	0.5
752	STAN	3	0.5	-0.501784	-0.117943	0.690661	-0.310388	0.360753	-0.185729	-0.178594	0.666667	NA	0	0	-0.333333	-0.5
752	STAN	3	0.5	-0.501784	-0.117943	0.690661	-0.310388	0.360753	-0.185729	-0.178594	0.666667	0	0	0	-0.333333	-0.5
200	STAN	7	0.5	-0.501784	-0.117943	-0.309339	-0.310388	-0.639247	0.814271	-0.178594	0.166667	0.166667	-0.333333	-0.333333	1	0.833333
200	STAN	7	0.5	-0.501784	-0.117943	-0.309339	-0.310388	-0.639247	0.814271	-0.178594	0.166667	0.166667	-0.333333	0.666667	-1	-1.16667
200	STAN	3	0.5	-0.501784	-0.117943	-0.309339	-0.310388	-0.639247	0.814271	-0.178594	0.166667	0.166667	-0.333333	0.666667	1	0.833333
426	STAN	3	0.5	0.498216	-0.117943	-0.309339	0.689612	-0.639247	-0.185729	-0.178594	-0.166667	0.166667	0	NA	-0.166667	-0.166667
426	STAN	5	0.5	0.498216	-0.117943	-0.309339	0.689612	-0.639247	-0.185729	-0.178594	-0.166667	0.166667	0	0	-0.166667	-0.166667
426	STAN	4	0.5	0.498216	-0.117943	-0.309339	0.689612	-0.639247	-0.185729	-0.178594	-0.166667	0.166667	0	0	-0.166667	-1.16667
436	STAN	3	0.5	0.498216	-0.117943	-0.309339	0.689612	-0.639247	-0.185729	-0.178594	0	0.166667	0.333333	0	0	0
436	STAN	4	0.5	0.498216	-0.117943	-0.309339	0.689612	-0.639247	-0.185729	-0.178594	0	0.166667	0.333333	0	0	0
436	STAN	4	0.5	0.498216	-0.117943	-0.309339	0.689612	-0.639247	-0.185729	-0.178594	0	0.166667	0.333333	0	0	0
192	STAN	8	0.5	0.498216	-0.117943	-0.309339	0.689612	0.360753	-0.185729	-0.178594	0	0	-0.4	0	-1.16667	0
192	STAN	5	0.5	0.498216	-0.117943	-0.309339	0.689612	0.360753	-0.185729	-0.178594	0	0	NA	0	0.833333	1
192	STAN	7	0.5	0.498216	-0.117943	-0.309339	0.689612	0.360753	-0.185729	-0.178594	0	0	-0.4	0	0.833333	1
726	STAN	2	0.5	0.498216	0.882057	0.690661	-0.310388	-0.639247	-0.185729	-0.178594	0	0.333333	0	0	1.33333	1.16667
726	STAN	2	0.5	0.498216	0.882057	0.690661	-0.310388	-0.639247	-0.185729	-0.178594	0	0.333333	0	0	0.333333	0.166667
726	STAN	2	0.5	0.498216	0.882057	0.690661	-0.310388	-0.639247	-0.185729	-0.178594	0	0.333333	0	0	0.333333	0.166667
583	STAN	3	0.5	-0.501784	-0.117943	-0.309339	-0.310388	-0.639247	-0.185729	-0.178594	0.333333	0	-0.333333	0	1.5	1.5
583	STAN	3	0.5	-0.501784	-0.117943	-0.309339	-0.310388	-0.639247	-0.185729	-0.178594	0.333333	0	0.666667	0	0.5	0.5
583	STAN	4	0.5	-0.501784	-0.117943	-0.309339	-0.310388	-0.639247	-0.185729	-0.178594	0.333333	0	0.666667	0	-0.5	0.5
796	STAN	8	0.5	0.498216	-0.117943	-0.309339	0.689612	-0.639247	-0.185729	-0.178594	0	0.166667	0	0	1.16667	0.833333
796	STAN	5	0.5	0.498216	-0.117943	-0.309339	0.689612	-0.639247	-0.185729	-0.178594	0	0.166667	NA	0	-0.833333	-1.16667
796	STAN	4	0.5	0.498216	-0.117943	-0.309339	0.689612	-0.639247	-0.185729	-0.178594	0	0.166667	0	0	-0.833333	-0.166667
467	STAN	4	0.5	-0.501784	-0.117943	-0.309339	0.689612	-0.639247	-0.185729	-0.178594	0	0	0	0	0.333333	0.5
467	STAN	2	0.5	-0.501784	-0.117943	-0.309339	0.689612	-0.639247	-0.185729	-0.178594	0	0	0	0	0.333333	0.5
467	STAN	5	0.5	-0.501784	-0.117943	-0.309339	0.689612	-0.639247	-0.185729	-0.178594	0	0	0	0	-1.66667	-1.5
492	STAN	4	0.5	0.498216	-0.117943	-0.309339	-0.310388	0.360753	0.814271	-0.178594	0	0	0.333333	0	0.5	0.5
492	STAN	4	0.5	0.498216	-0.117943	-0.309339	-0.310388	0.360753	0.814271	-0.178594	0	0	0.333333	0	0.5	0.5
492	STAN	6	0.5	0.498216	-0.117943	-0.309339	-0.310388	0.360753	0.814271	-0.178594	0	0	0.333333	0	-2.5	-0.5
568	STAN	3	0.5	-0.501784	-0.117943	0.690661	-0.310388	0.360753	0.814271	-0.178594	0	0	0	0	0.333333	0
568	STAN	4	0.5	-0.501784	-0.117943	0.690661	-0.310388	0.360753	0.814271	-0.178594	NA	0	0	0	-0.666667	-1
568	STAN	4	0.5	-0.501784	-0.117943	0.690661	-0.310388	0.360753	0.814271	-0.178594	0	0	0	0	0.333333	0
243	STAN	1	0.5	0.498216	0.882057	-0.309339	-0.310388	0.360753	-0.185729	-0.178594	0	0	0	0	1.33333	0.833333
243	STAN	1	0.5	0.498216	0.882057	-0.309339	-0.310388	0.360753	-0.185729	-0.178594	0	0	0	0	1.33333	0.833333
243	STAN	2	0.5	0.498216	0.882057	-0.309339	-0.310388	0.360753	-0.185729	-0.178594	0	0	0	0	1.33333	-0.166667
506	STAN	1	0.5	-0.501784	-0.117943	-0.309339	0.689612	0.360753	-0.185729	0.821406	0.5	0	0.333333	-0.333333	1.16667	1
506	STAN	2	0.5	-0.501784	-0.117943	-0.309339	0.689612	0.360753	-0.185729	0.821406	0.5	0	0.333333	-0.333333	1.16667	0
506	STAN	8	0.5	-0.501784	-0.117943	-0.309339	0.689612	0.360753	-0.185729	0.821406	0.5	0	-0.666667	-0.333333	-0.833333	0
427	STAN	6	0.5	-0.501784	0.882057	-0.309339	0.689612	0.360753	-0.185729	-0.178594	0.166667	-0.166667	0	-0.166667	0.333333	-0.5
427	STAN	2	0.5	-0.501784	0.882057	-0.309339	0.689612	0.360753	-0.185729	-0.178594	0.166667	-0.166667	0	-0.166667	0.333333	0.5
427	STAN	5	0.5	-0.501784	0.882057	-0.309339	0.689612	0.360753	-0.185729	-0.178594	0.166667	-0.166667	0	-0.166667	0.333333	0.5
713	STAN	6	0.5	-0.501784	-0.117943	-0.309339	-0.310388	0.360753	-0.185729	-0.178594	0.5	0	0	0	-1.83333	-1
713	STAN	5	0.5	-0.501784	-0.117943	-0.309339	-0.310388	0.360753	-0.185729	-0.178594	0.5	0	0	0	1.16667	0
713	STAN	5	0.5	-0.501784	-0.117943	-0.309339	-0.310388	0.360753	-0.185729	-0.178594	0.5	0	0	0	0.166667	1
448	STAN	4	0.5	-0.501784	-0.117943	-0.309339	0.689612	0.360753	-0.185729	-0.178594	-0.166667	-0.166667	-0.166667	0	-0.5	0.166667
448	STAN	3	0.5	-0.501784	-0.117943	-0.309339	0.689612	0.360753	-0.185729	-0.178594	0.833333	-0.166667	-0.166667	0	1.5	-0.833333
448	STAN	6	0.5	-0.501784	-0.117943	-0.309339	0.689612	0.360753	-0.185729	-0.178594	-0.166667	-0.166667	-0.166667	0	0.5	0.166667
663	STAN	6	0.5	-0.501784	-0.117943	-0.309339	-0.310388	0.360753	0.814271	0.821406	0.666667	-0.166667	-0.166667	0	-1.33333	-1.33333
663	STAN	5	0.5	-0.501784	-0.117943	-0.309339	-0.310388	0.360753	0.814271	0.821406	0.666667	-0.166667	-0.166667	0	1.66667	1.66667
663	STAN	5	0.5	-0.501784	-0.117943	-0.309339	-0.310388	0.360753	0.814271	0.821406	-0.333333	-0.166667	-0.166667	0	-0.333333	0.666667
355	STAN	7	0.4	0.498216	-0.117943	-0.309339	-0.310388	-0.639247	-0.185729	-0.178594	0	0.25	0	0	-1	-1.6
355	STAN	7	0.4	0.498216	-0.117943	-0.309339	-0.310388	-0.639247	-0.185729	-0.178594	0	0.25	0	0	1	0.4
355	STAN	1	0.4	0.498216	-0.117943	-0.309339	-0.310388	-0.639247	-0.185729	-0.178594	0	-0.75	0	0	1	0.4
224	STAN	6	0.5	-0.501784	-0.117943	-0.309339	-0.310388	0.360753	-0.185729	-0.178594	0.666667	-0.333333	-0.5	-0.166667	-1.33333	-0.333333
224	STAN	5	0.5	-0.501784	-0.117943	-0.309339	-0.310388	0.360753	-0.185729	-0.178594	-0.333333	-0.333333	0.5	-0.166667	0.666667	0.666667
224	STAN	5	0.5	-0.501784	-0.117943	-0.309339	-0.310388	0.360753	-0.185729	-0.178594	0.666667	-0.333333	0.5	0.833333	0.666667	-0.333333
201	STAN	6	0.5	0.498216	-0.117943	-0.309339	-0.310388	0.360753	-0.185729	-0.178594	0	0	-0.166667	0	0.833333	0.666667
201	STAN	5	0.5	0.498216	-0.117943	-0.309339	-0.310388	0.360753	-0.185729	-0.178594	0	0	-0.166667	0	0.833333	-1.33333
201	STAN	4	0.5	0.498216	-0.117943	-0.309339	-0.310388	0.360753	-0.185729	-0.178594	0	0	-0.166667	0	-0.166667	0.666667
508	STAN	5	0.5	0.498216	-0.117943	-0.309339	-0.310388	0.360753	-0.185729	0.821406	0	-0.2	-0.166667	0	-0.166667	0.166667
508	STAN	3	0.5	0.498216	-0.117943	-0.309339	-0.310388	0.360753	-0.185729	0.821406	0	NA	-0.166667	0	-0.166667	0.166667
508	STAN	4	0.5	0.498216	-0.117943	-0.309339	-0.310388	0.360753	-0.185729	0.821406	0	-0.2	-0.166667	0	0.833333	1.16667
718	STAN	3	0.5	-0.501784	-0.117943	-0.309339	-0.310388	0.360753	-0.185729	-0.178594	0	-0.166667	0	0	-1.66667	-0.166667
718	STAN	3	0.5	-0.501784	-0.117943	-0.309339	-0.310388	0.360753	-0.185729	-0.178594	0	-0.166667	0	0	1.33333	0.833333
718	STAN	4	0.5	-0.501784	-0.117943	-0.309339	-0.310388	0.360753	-0.185729	-0.178594	0	-0.166667	0	0	-1.66667	-0.166667
222	STAN	3	0.5	-0.501784	-0.117943	-0.309339	-0.310388	-0.639247	-0.185729	-0.178594	-0.4	0.333333	0	0	0.333333	-0.166667
222	STAN	6	0.5	-0.501784	-0.117943	-0.309339	-0.310388	-0.639247	-0.185729	-0.178594	-0.4	0.333333	0	0	-1.66667	-0.166667
222	STAN	6	0.5	-0.501784	-0.117943	-0.309339	-0.310388	-0.639247	-0.185729	-0.178594	0.6	0.333333	0	0	0.333333	0.833333
164	STAN	7	0.5	0.498216	-0.117943	-0.309339	-0.310388	0.360753	-0.185729	-0.178594	0	0	-0.166667	0	1.5	0.833333
164	STAN	6	0.5	0.498216	-0.117943	-0.309339	-0.310388	0.360753	-0.185729	-0.178594	0	0	-0.166667	0	-1.5	0.833333
164	STAN	8	0.5	0.498216	-0.117943	-0.309339	-0.310388	0.360753	-0.185729	-0.178594	0	0	0.833333	0	-1.5	-2.16667
464	STAN	5	0.5	-0.501784	-0.117943	-0.309339	0.689612	-0.639247	-0.185729	-0.178594	0	0.5	0	0	0.166667	-1.66667
464	STAN	5	0.5	-0.501784	-0.117943	-0.309339	0.689612	-0.639247	-0.185729	-0.178594	0	0.5	0	0	0.166667	0.333333
464	STAN	3	0.5	-0.501784	-0.117943	-0.309339	0.689612	-0.639247	-0.185729	-0.178594	0	0.5	0	0	0.166667	0.333333
367	STAN	5	0.5	0.498216	-0.117943	-0.309339	-0.310388	0.360753	-0.185729	-0.178594	0	0	0	0	0.666667	1.16667
367	STAN	5	0.5	0.498216	-0.117943	-0.309339	-0.310388	0.360753	-0.185729	-0.178594	0	0	0	0	0.666667	0.166667
367	STAN	6	0.5	0.498216	-0.117943	-0.309339	-0.310388	0.360753	-0.185729	-0.178594	0	0	0	0	-1.33333	-1.83333
627	STAN	6	0.5	0.498216	-0.117943	-0.309339	-0.310388	0.360753	0.814271	-0.178594	0	-0.333333	0.166667	0	-0.166667	0.166667
627	STAN	2	0.5	0.498216	-0.117943	-0.309339	-0.310388	0.360753	0.814271	-0.178594	0	-0.333333	0.166667	0	0.833333	0.166667
627	STAN	5	0.5	0.498216	-0.117943	-0.309339	-0.310388	0.360753	0.814271	-0.178594	0	-0.333333	0.166667	0	-0.166667	-0.833333
617	STAN	4	0.5	-0.501784	-0.117943	-0.309339	-0.310388	0.360753	0.814271	-0.178594	0.166667	-0.166667	0.666667	0	0.5	0.666667
617	STAN	4	0.5	-0.501784	-0.117943	-0.309339	-0.310388	0.360753	0.814271	-0.178594	0.166667	-0.166667	0.666667	0	-0.5	-0.333333
617	STAN	2	0.5	-0.501784	-0.117943	-0.309339	-0.310388	0.360753	0.814271	-0.178594	0.166667	-0.166667	-0.333333	0	-0.5	-0.333333
661	STAN	5	0.5	-0.501784	-0.117943	-0.309339	0.689612	-0.639247	-0.185729	-0.178594	0	0.166667	0	0	0	-0.166667
661	STAN	2	0.5	-0.501784	-0.117943	-0.309339	0.689612	-0.639247	-0.185729	-0.178594	0	0.166667	0	0	1	0.833333
661	STAN	5	0.5	-0.501784	-0.117943	-0.309339	0.689612	-0.639247	-0.185729	-0.178594	0	0.166667	0	0	-1	-0.166667
545	STAN	2	0.5	0.498216	0.882057	-0.309339	-0.310388	0.360753	-0.185729	-0.178594	0	0	0	0	0.833333	1.16667
545	STAN	3	0.5	0.498216	0.882057	-0.309339	-0.310388	0.360753	-0.185729	-0.178594	0	0	0	0	-0.166667	0.166667
545	STAN	5	0.5	0.498216	0.882057	-0.309339	-0.310388	0.360753	-0.185729	-0.178594	0	0	0	0	-0.166667	0.166667
618	STAN	6	0.5	0.498216	-0.117943	-0.309339	-0.310388	0.360753	-0.185729	-0.178594	0	-0.166667	0	0	0.666667	0
618	STAN	4	0.5	0.498216	-0.117943	-0.309339	-0.310388	0.360753	-0.185729	-0.178594	0	-0.166667	0	0	-0.333333	0
618	STAN	4	0.5	0.498216	-0.117943	-0.309339	-0.310388	0.360753	-0.185729	-0.178594	0	-0.166667	0	0	-0.333333	0
298	STAN	6	0.5	-0.501784	-0.117943	-0.309339	0.689612	-0.639247	0.814271	-0.178594	0.333333	0.333333	0.333333	0	-0.333333	-0.833333
298	STAN	4	0.5	-0.501784	-0.117943	-0.309339	0.689612	-0.639247	0.814271	-0.178594	0.333333	0.333333	0.333333	0	-1.33333	0.166667
298	STAN	3	0.5	-0.501784	-0.117943	-0.309339	0.689612	-0.639247	0.814271	-0.178594	0.333333	0.333333	0.333333	0	-1.33333	-0.833333
204	STAN	5	0.6	-0.501784	-0.117943	-0.309339	-0.310388	0.360753	0.814271	-0.178594	0.5	0	0.2	0	-0.4	0
204	STAN	7	0.6	-0.501784	-0.117943	-0.309339	-0.310388	0.360753	0.814271	-0.178594	-0.5	0	0.2	0	-1.4	0
721	STAN	5	0.5	0.498216	0.882057	-0.309339	-0.310388	0.360753	-0.185729	-0.178594	0	0	0	0	-1.66667	-0.5
721	STAN	5	0.5	0.498216	0.882057	-0.309339	-0.310388	0.360753	-0.185729	-0.178594	0	0	0	0	0.333333	0.5
721	STAN	5	0.5	0.498216	0.882057	-0.309339	-0.310388	0.360753	-0.185729	-0.178594	0	0	0	0	-0.666667	-1.5
666	STAN	7	0.5	-0.501784	-0.117943	-0.309339	0.689612	0.360753	-0.185729	-0.178594	-0.666667	0	-0.2	-0.166667	0.166667	-0.5
666	STAN	4	0.5	-0.501784	-0.117943	-0.309339	0.689612	0.360753	-0.185729	-0.178594	0.333333	0	NA	-0.166667	0.166667	0.5
666	STAN	4	0.5	-0.501784	-0.117943	-0.309339	0.689612	0.360753	-0.185729	-0.178594	0.333333	0	0.8	-0.166667	1.16667	0.5
325	STAN	5	0.5	0.498216	-0.117943	-0.309339	-0.310388	-0.639247	-0.185729	-0.178594	0	0	0	0	-2.16667	0.5
325	STAN	4	0.5	0.498216	-0.117943	-0.309339	-0.310388	-0.639247	-0.185729	-0.178594	0	0	0	0	-0.166667	0.5
325	STAN	5	0.5	0.498216	-0.117943	-0.309339	-0.310388	-0.639247	-0.185729	-0.178594	0	0	0	0	0.833333	-0.5
219	STAN	3	0.5	0.498216	-0.117943	-0.309339	0.689612	-0.639247	-0.185729	0.821406	0	0	0.333333	0	-0.166667	0
219	STAN	2	0.5	0.498216	-0.117943	-0.309339	0.689612	-0.639247	-0.185729	0.821406	0	0	-0.666667	0	-0.166667	0
219	STAN	5	0.5	0.498216	-0.117943	-0.309339	0.689612	-0.639247	-0.185729	0.821406	0	0	0.333333	0	-0.166667	0
319	STAN	5	0.5	0.498216	-0.117943	-0.309339	-0.310388	0.360753	-0.185729	0.821406	0	0	-0.5	-0.166667	0.333333	-0.833333
319	STAN	6	0.5	0.498216	-0.117943	-0.309339	-0.310388	0.360753	-0.185729	0.821406	0	0	0.5	-0.166667	-1.66667	0.166667
319	STAN	4	0.5	0.498216	-0.117943	-0.309339	-0.310388	0.360753	-0.185729	0.821406	0	0	0.5	-0.166667	1.33333	0.166667
789	STAN	4	0.5	-0.501784	-0.117943	-0.309339	-0.310388	0.360753	-0.185729	-0.178594	0.166667	0	0	0	-0.166667	-0.333333
789	STAN	2	0.5	-0.501784	-0.117943	-0.309339	-0.310388	0.360753	-0.185729	-0.178594	0.166667	0	0	0	0.833333	0.666667
789	STAN	3	0.5	-0.501784	-0.117943	-0.309339	-0.310388	0.360753	-0.185729	-0.178594	0.166667	0	0	0	-0.166667	-0.333333
161	STAN	6	0.5	-0.501784	-0.117943	-0.309339	-0.310388	-0.639247	-0.185729	0.821406	0.8	0.4	-0.333333	0	-0.833333	-0.166667
161	STAN	7	0.5	-0.501784	-0.117943	-0.309339	-0.310388	-0.639247	-0.185729	0.821406	-0.2	0.4	-0.333333	0	-1.83333	-2.16667
161	STAN	5	0.5	-0.501784	-0.117943	-0.309339	-0.310388	-0.639247	-0.185729	0.821406	-0.2	0.4	-0.333333	0	0.166667	0.833333
758	STAN	7	0.5	0.498216	0.882057	0.690661	-0.310388	-0.639247	-0.185729	-0.178594	0	0.166667	-0.166667	0	0	0.166667
758	STAN	3	0.5	0.498216	0.882057	0.690661	-0.310388	-0.639247	-0.185729	-0.178594	0	0.166667	-0.166667	0	1	1.16667
758	STAN	4	0.5	0.498216	0.882057	0.690661	-0.310388	-0.639247	-0.185729	-0.178594	0	0.166667	-0.166667	0	0	-0.833333
246	STAN	2	0.5	0.498216	-0.117943	0.690661	-0.310388	0.360753	0.814271	-0.178594	0	0	0.333333	0	0.833333	1
246	STAN	4	0.5	0.498216	-0.117943	0.690661	-0.310388	0.360753	0.814271	-0.178594	NA	0	0.333333	0	-0.166667	0
246	STAN	3	0.5	0.498216	-0.117943	0.690661	-0.310388	0.360753	0.814271	-0.178594	0	0	-0.666667	0	-0.166667	-1
575	STAN	2	0.5	-0.501784	-0.117943	0.690661	-0.310388	0.360753	-0.185729	-0.178594	0.666667	0	-0.166667	0	1	1.2
575	STAN	4	0.5	-0.501784	-0.117943	0.690661	-0.310388	0.360753	-0.185729	-0.178594	-0.333333	0	-0.166667	0	1	0.2
575	STAN	4	0.5	-0.501784	-0.117943	0.690661	-0.310388	0.360753	-0.185729	-0.178594	-0.333333	0	-0.166667	0	0	0.2
649	STAN	2	0.5	-0.501784	-0.117943	-0.309339	-0.310388	0.360753	0.814271	-0.178594	-0.166667	0	-0.5	0	1	1
649	STAN	6	0.5	-0.501784	-0.117943	-0.309339	-0.310388	0.360753	0.814271	-0.178594	-0.166667	0	0.5	0	-1	0
649	STAN	7	0.5	-0.501784	-0.117943	-0.309339	-0.310388	0.360753	0.814271	-0.178594	-0.166667	0	0.5	0	-1	0
348	STAN	2	0.5	-0.501784	-0.117943	-0.309339	0.689612	-0.639247	0.814271	-0.178594	0.666667	0.333333	0.333333	0	1.33333	1
348	STAN	2	0.5	-0.501784	-0.117943	-0.309339	0.689612	-0.639247	0.814271	-0.178594	0.666667	-0.666667	0.333333	0	-1.66667	0
348	STAN	3	0.5	-0.501784	-0.117943	-0.309339	0.689612	-0.639247	0.814271	-0.178594	-0.333333	0.333333	0.333333	0	0.333333	0
762	STAN	5	0.5	0.498216	-0.117943	-0.309339	-0.310388	-0.639247	-0.185729	-0.178594	0	0.333333	0	0	0.833333	0.666667
762	STAN	5	0.5	0.498216	-0.117943	-0.309339	-0.310388	-0.639247	-0.185729	-0.178594	0	0.333333	0	0	-1.16667	0.666667
762	STAN	5	0.5	0.498216	-0.117943	-0.309339	-0.310388	-0.639247	-0.185729	-0.178594	0	0.333333	0	0	-0.166667	0.666667
145	STAN	2	0.5	0.498216	-0.117943	0.690661	-0.310388	-0.639247	-0.185729	-0.178594	0	-0.5	-0.166667	0	-0.333333	NA
145	STAN	2	0.5	0.498216	-0.117943	0.690661	-0.310388	-0.639247	-0.185729	-0.178594	0	-0.5	-0.166667	0	0.666667	-0.4
145	STAN	2	0.5	0.498216	-0.117943	0.690661	-0.310388	-0.639247	-0.185729	-0.178594	0	0.5	0.833333	0	-0.333333	-0.4
217	STAN	4	0.5	-0.501784	-0.117943	-0.309339	-0.310388	0.360753	0.814271	-0.178594	-0.5	0	0.333333	0	-0.8	-1.33333
217	STAN	6	0.5	-0.501784	-0.117943	-0.309339	-0.310388	0.360753	0.814271	-0.178594	0.5	0	0.333333	0	1.2	0.666667
217	STAN	5	0.5	-0.501784	-0.117943	-0.309339	-0.310388	0.360753	0.814271	-0.178594	0.5	0	0.333333	0	1.2	0.666667
98	STAN	5	0.5	-0.501784	-0.117943	-0.309339	0.689612	-0.639247	-0.185729	-0.178594	0.833333	0.333333	0	0	0.6	0.2
98	STAN	2	0.5	-0.501784	-0.117943	-0.309339	0.689612	-0.639247	-0.185729	-0.178594	-0.166667	0.333333	0	0	0.6	0.2
98	STAN	4	0.5	-0.501784	-0.117943	-0.309339	0.689612	-0.639247	-0.185729	-0.178594	-0.166667	0.333333	0	0	-1.4	0.2
525	STAN	5	0.5	0.498216	-0.117943	-0.309339	0.689612	-0.639247	-0.185729	0.821406	0	0.333333	-0.333333	0	-2.16667	-1
525	STAN	2	0.5	0.498216	-0.117943	-0.309339	0.689612	-0.639247	-0.185729	0.821406	0	0.333333	-0.333333	0	-0.166667	0
525	STAN	3	0.5	0.498216	-0.117943	-0.309339	0.689612	-0.639247	-0.185729	0.821406	0	0.333333	-0.333333	0	1.83333	1
187	STAN	4	0.5	0.498216	-0.117943	-0.309339	-0.310388	0.360753	-0.185729	-0.178594	0	-0.166667	0	0	0	0
187	STAN	3	0.5	0.498216	-0.117943	-0.309339	-0.310388	0.360753	-0.185729	-0.178594	0	-0.166667	0	0	0	0
187	STAN	3	0.5	0.498216	-0.117943	-0.309339	-0.310388	0.360753	-0.185729	-0.178594	0	-0.166667	0	0	0	0
163	STAN	6	0.5	-0.501784	-0.117943	0.690661	0.689612	-0.639247	-0.185729	0.821406	0.166667	0.5	-0.166667	0.833333	0.833333	0
163	STAN	5	0.5	-0.501784	-0.117943	0.690661	0.689612	-0.639247	-0.185729	0.821406	-0.833333	0.5	-0.166667	-0.166667	-1.16667	0
163	STAN	6	0.5	-0.501784	-0.117943	0.690661	0.689612	-0.639247	-0.185729	0.821406	0.166667	0.5	-0.166667	-0.166667	0.833333	0
247	STAN	3	0.5	0.498216	0.882057	-0.309339	-0.310388	0.360753	-0.185729	-0.178594	0	0	0	0	1.16667	1.16667
247	STAN	2	0.5	0.498216	0.882057	-0.309339	-0.310388	0.360753	-0.185729	-0.178594	0	0	0	0	0.166667	0.166667
247	STAN	3	0.5	0.498216	0.882057	-0.309339	-0.310388	0.360753	-0.185729	-0.178594	0	0	0	0	0.166667	0.166667
422	STAN	3	0.5	-0.501784	-0.117943	-0.309339	0.689612	0.360753	-0.185729	-0.178594	0.6	0	0	0	0.5	0.333333
422	STAN	3	0.5	-0.501784	-0.117943	-0.309339	0.689612	0.360753	-0.185729	-0.178594	-0.4	0	0	0	0.5	1.33333
422	STAN	5	0.5	-0.501784	-0.117943	-0.309339	0.689612	0.360753	-0.185729	-0.178594	-0.4	0	0	0	0.5	0.333333
772	STAN	1	0.5	0.498216	-0.117943	0.690661	-0.310388	0.360753	-0.185729	-0.178594	0	-0.166667	0	0	0.666667	0.6
772	STAN	2	0.5	0.498216	-0.117943	0.690661	-0.310388	0.360753	-0.185729	-0.178594	0	-0.166667	0	0	-0.333333	-0.4
772	STAN	3	0.5	0.498216	-0.117943	0.690661	-0.310388	0.360753	-0.185729	-0.178594	0	-0.166667	0	0	-0.333333	-0.4
768	STAN	3	0.5	0.498216	-0.117943	0.690661	0.689612	0.360753	-0.185729	0.821406	-0.166667	-0.166667	0	0	-0.833333	-0.666667
768	STAN	2	0.5	0.498216	-0.117943	0.690661	0.689612	0.360753	-0.185729	0.821406	-0.166667	-0.166667	0	0	1.16667	0.333333
768	STAN	3	0.5	0.498216	-0.117943	0.690661	0.689612	0.360753	-0.185729	0.821406	0.833333	-0.166667	0	0	0.166667	0.333333
600	STAN	2	0.5	-0.501784	0.882057	-0.309339	-0.310388	0.360753	-0.185729	-0.178594	0.166667	-0.333333	0	-0.166667	0.5	-0.166667
600	STAN	2	0.5	-0.501784	0.882057	-0.309339	-0.310388	0.360753	-0.185729	-0.178594	0.166667	-0.333333	0	-0.166667	0.5	0.833333
600	STAN	3	0.5	-0.501784	0.882057	-0.309339	-0.310388	0.360753	-0.185729	-0.178594	0.166667	-0.333333	0	-0.166667	-0.5	-0.166667
202	STAN	3	0.5	-0.501784	-0.117943	-0.309339	-0.310388	0.360753	0.814271	-0.178594	-0.5	-0.166667	-0.5	0	0.166667	0.666667
202	STAN	5	0.5	-0.501784	-0.117943	-0.309339	-0.310388	0.360753	0.814271	-0.178594	0.5	-0.166667	0.5	0	0.166667	-0.333333
202	STAN	4	0.5	-0.501784	-0.117943	-0.309339	-0.310388	0.360753	0.814271	-0.178594	-0.5	-0.166667	-0.5	0	1.16667	-0.333333
226	STAN	5	0.4	0.498216	-0.117943	-0.309339	-0.310388	-0.639247	-0.185729	-0.178594	NA	NA	NA	NA	NA	NA
226	STAN	6	0.4	0.498216	-0.117943	-0.309339	-0.310388	-0.639247	-0.185729	-0.178594	0	0.25	0	0	0.25	0.5
226	STAN	4	0.4	0.498216	-0.117943	-0.309339	-0.310388	-0.639247	-0.185729	-0.178594	0	0.25	0	0	0.25	0.5
662	STAN	5	0.5	0.498216	-0.117943	-0.309339	-0.310388	0.360753	0.814271	-0.178594	0	-0.333333	0.5	0	-1	0.333333
662	STAN	5	0.5	0.498216	-0.117943	-0.309339	-0.310388	0.360753	0.814271	-0.178594	0	-0.333333	0.5	0	1	0.333333
662	STAN	4	0.5	0.498216	-0.117943	-0.309339	-0.310388	0.360753	0.814271	-0.178594	0	-0.333333	0.5	0	1	0.333333
659	STAN	6	0.5	-0.501784	-0.117943	-0.309339	0.689612	-0.639247	0.814271	-0.178594	0.166667	0.2	NA	0	0	0.2
659	STAN	3	0.5	-0.501784	-0.117943	-0.309339	0.689612	-0.639247	0.814271	-0.178594	0.166667	0.2	-0.2	0	0	1.2
659	STAN	6	0.5	-0.501784	-0.117943	-0.309339	0.689612	-0.639247	0.814271	-0.178594	0.166667	NA	-0.2	0	0	NA
692	STAN	6	0.5	-0.501784	-0.117943	-0.309339	-0.310388	-0.639247	-0.185729	-0.178594	-0.4	0	0	0	0	-0.166667
692	STAN	3	0.5	-0.501784	-0.117943	-0.309339	-0.310388	-0.639247	-0.185729	-0.178594	-0.4	0	0	0	1	0.833333
692	STAN	5	0.5	-0.501784	-0.117943	-0.309339	-0.310388	-0.639247	-0.185729	-0.178594	0.6	0	0	0	-2	-0.166667
330	STAN	5	0.5	0.498216	-0.117943	-0.309339	-0.310388	0.360753	-0.185729	-0.178594	0	-0.333333	-0.166667	0	-0.166667	0
330	STAN	4	0.5	0.498216	-0.117943	-0.309339	-0.310388	0.360753	-0.185729	-0.178594	0	-0.333333	-0.166667	0	-0.166667	-1
330	STAN	2	0.5	0.498216	-0.117943	-0.309339	-0.310388	0.360753	-0.185729	-0.178594	0	-0.333333	-0.166667	0	0.833333	1
431	STAN	4	0.5	0.498216	-0.117943	-0.309339	-0.310388	-0.639247	-0.185729	-0.178594	0	0.5	0	0	-0.5	-1.16667
431	STAN	6	0.5	0.498216	-0.117943	-0.309339	-0.310388	-0.639247	-0.185729	-0.178594	0	0.5	0	0	0.5	0.833333
431	STAN	6	0.5	0.498216	-0.117943	-0.309339	-0.310388	-0.639247	-0.185729	-0.178594	0	0.5	0	0	-0.5	-0.166667
395	STAN	4	0.5	0.498216	0.882057	-0.309339	-0.310388	0.360753	-0.185729	-0.178594	0	0	-0.166667	-0.166667	0.333333	NA
395	STAN	4	0.5	0.498216	0.882057	-0.309339	-0.310388	0.360753	-0.185729	-0.178594	0	0	-0.166667	-0.166667	-0.666667	0.2
395	STAN	4	0.5	0.498216	0.882057	-0.309339	-0.310388	0.360753	-0.185729	-0.178594	0	0	-0.166667	-0.166667	0.333333	0.2
402	STAN	5	0.5	-0.501784	0.882057	0.690661	-0.310388	0.360753	-0.185729	-0.178594	-0.2	0	0	0	1	0.833333
402	STAN	3	0.5	-0.501784	0.882057	0.690661	-0.310388	0.360753	-0.185729	-0.178594	0.8	0	0	0	-1	-0.166667
402	STAN	5	0.5	-0.501784	0.882057	0.690661	-0.310388	0.360753	-0.185729	-0.178594	-0.2	0	0	0	0	-0.166667
277	STAN	3	0.5	-0.501784	-0.117943	-0.309339	0.689612	-0.639247	-0.185729	-0.178594	0	-0.5	0	0	1.83333	0.5
277	STAN	1	0.5	-0.501784	-0.117943	-0.309339	0.689612	-0.639247	-0.185729	-0.178594	0	0.5	0	0	1.83333	1.5
277	STAN	7	0.5	-0.501784	-0.117943	-0.309339	0.689612	-0.639247	-0.185729	-0.178594	0	0.5	0	0	-1.16667	-1.5
635	STAN	5	0.5	0.498216	-0.117943	-0.309339	-0.310388	0.360753	-0.185729	-0.178594	0	0	0	0	-0.666667	0.666667
635	STAN	5	0.5	0.498216	-0.117943	-0.309339	-0.310388	0.360753	-0.185729	-0.178594	0	0	0	0	0.333333	-1.33333
635	STAN	6	0.5	0.498216	-0.117943	-0.309339	-0.310388	0.360753	-0.185729	-0.178594	0	0	0	0	-1.66667	0.666667
280	STAN	4	0.5	-0.501784	-0.117943	-0.309339	0.689612	-0.639247	0.814271	-0.178594	0.333333	0.5	0.5	0	1.16667	0.833333
280	STAN	7	0.5	-0.501784	-0.117943	-0.309339	0.689612	-0.639247	0.814271	-0.178594	0.333333	0.5	0.5	0	-1.83333	-1.16667
280	STAN	7	0.5	-0.501784	-0.117943	-0.309339	0.689612	-0.639247	0.814271	-0.178594	0.333333	-0.5	0.5	0	-1.83333	-1.16667
260	STAN	5	0.5	0.498216	-0.117943	-0.309339	-0.310388	0.360753	-0.185729	-0.178594	0	0	0	0	-0.833333	0.666667
260	STAN	6	0.5	0.498216	-0.117943	-0.309339	-0.310388	0.360753	-0.185729	-0.178594	0	0	0	0	1.16667	0.666667
260	STAN	5	0.5	0.498216	-0.117943	-0.309339	-0.310388	0.360753	-0.185729	-0.178594	0	0	0	0	-0.833333	-1.33333
700	STAN	4	0.5	-0.501784	-0.117943	-0.309339	-0.310388	-0.639247	-0.185729	-0.178594	0	0.166667	0.833333	0	0.166667	-0.166667
700	STAN	2	0.5	-0.501784	-0.117943	-0.309339	-0.310388	-0.639247	-0.185729	-0.178594	0	0.166667	-0.166667	0	0.166667	-0.166667
700	STAN	4	0.5	-0.501784	-0.117943	-0.309339	-0.310388	-0.639247	-0.185729	-0.178594	0	0.166667	-0.166667	0	-2.83333	-0.166667
95	STAN	4	0.5	0.498216	-0.117943	-0.309339	-0.310388	0.360753	-0.185729	-0.178594	0	-0.2	-0.333333	0	-1.6	-0.166667
95	STAN	6	0.5	0.498216	-0.117943	-0.309339	-0.310388	0.360753	-0.185729	-0.178594	0	-0.2	-0.333333	0	-0.6	-0.166667
95	STAN	4	0.5	0.498216	-0.117943	-0.309339	-0.310388	0.360753	-0.185729	-0.178594	0	-0.2	-0.333333	0	NA	-0.166667
742	STAN	3	0.5	-0.501784	-0.117943	0.690661	0.689612	0.360753	0.814271	0.821406	0.5	-0.166667	-0.166667	0	0.5	0.333333
742	STAN	6	0.5	-0.501784	-0.117943	0.690661	0.689612	0.360753	0.814271	0.821406	-0.5	-0.166667	0.833333	0	0.5	0.333333
742	STAN	5	0.5	-0.501784	-0.117943	0.690661	0.689612	0.360753	0.814271	0.821406	-0.5	-0.166667	-0.166667	0	-0.5	-1.66667
379	STAN	2	0.5	-0.501784	-0.117943	0.690661	0.689612	-0.639247	-0.185729	-0.178594	0.833333	0.333333	-0.166667	0	0.666667	0.833333
379	STAN	7	0.5	-0.501784	-0.117943	0.690661	0.689612	-0.639247	-0.185729	-0.178594	-0.166667	0.333333	-0.166667	0	-0.333333	-0.166667
379	STAN	3	0.5	-0.501784	-0.117943	0.690661	0.689612	-0.639247	-0.185729	-0.178594	-0.166667	0.333333	-0.166667	0	0.666667	-0.166667
418	STAN	4	0.5	-0.501784	-0.117943	-0.309339	-0.310388	-0.639247	-0.185729	-0.178594	0.5	0.5	-0.2	0	1	-0.2
418	STAN	2	0.5	-0.501784	-0.117943	-0.309339	-0.310388	-0.639247	-0.185729	-0.178594	0.5	0.5	NA	0	1	NA
418	STAN	4	0.5	-0.501784	-0.117943	-0.309339	-0.310388	-0.639247	-0.185729	-0.178594	0.5	0.5	-0.2	0	-2	-0.2
315	STAN	6	0.5	-0.501784	-0.117943	-0.309339	-0.310388	-0.639247	-0.185729	-0.178594	-0.333333	0.333333	-0.166667	0	0.166667	0
315	STAN	3	0.5	-0.501784	-0.117943	-0.309339	-0.310388	-0.639247	-0.185729	-0.178594	0.666667	0.333333	-0.166667	0	1.16667	1
315	STAN	6	0.5	-0.501784	-0.117943	-0.309339	-0.310388	-0.639247	-0.185729	-0.178594	0.666667	0.333333	-0.166667	0	0.166667	0
193	STAN	7	0.5	0.498216	-0.117943	-0.309339	-0.310388	0.360753	-0.185729	-0.178594	0	-0.5	0.5	0	-1	-2.16667
193	STAN	6	0.5	0.498216	-0.117943	-0.309339	-0.310388	0.360753	-0.185729	-0.178594	0	-0.5	0.5	0	0	0.833333
193	STAN	5	0.5	0.498216	-0.117943	-0.309339	-0.310388	0.360753	-0.185729	-0.178594	0	-0.5	0.5	0	1	-0.166667
141	STAN	2	0.5	0.498216	0.882057	-0.309339	-0.310388	0.360753	-0.185729	-0.178594	0.8	0	0	0	1.5	0.333333
141	STAN	3	0.5	0.498216	0.882057	-0.309339	-0.310388	0.360753	-0.185729	-0.178594	-0.2	0	0	0	1.5	0.333333
141	STAN	6	0.5	0.498216	0.882057	-0.309339	-0.310388	0.360753	-0.185729	-0.178594	-0.2	0	NA	0	0.5	0.333333
442	STAN	2	0.5	0.498216	-0.117943	-0.309339	-0.310388	0.360753	-0.185729	-0.178594	0	0	0.5	0	0.833333	1
442	STAN	4	0.5	0.498216	-0.117943	-0.309339	-0.310388	0.360753	-0.185729	-0.178594	0	0	-0.5	0	-0.166667	0
442	STAN	2	0.5	0.498216	-0.117943	-0.309339	-0.310388	0.360753	-0.185729	-0.178594	0	0	-0.5	0	-0.166667	0
735	STAN	4	0.5	-0.501784	-0.117943	0.690661	0.689612	-0.639247	-0.185729	-0.178594	0.5	0.2	-0.4	0	0.166667	-0.166667
735	STAN	3	0.5	-0.501784	-0.117943	0.690661	0.689612	-0.639247	-0.185729	-0.178594	NA	0.2	-0.4	0	0.166667	-0.166667
735	STAN	4	0.5	-0.501784	-0.117943	0.690661	0.689612	-0.639247	-0.185729	-0.178594	NA	NA	0.6	0	0.166667	-0.166667
172	STAN	4	0.5	-0.501784	0.882057	-0.309339	-0.310388	-0.639247	-0.185729	-0.178594	0.333333	0.166667	0	0	0	1.16667
172	STAN	3	0.5	-0.501784	0.882057	-0.309339	-0.310388	-0.639247	-0.185729	-0.178594	0.333333	0.166667	0	0	0	0.166667
172	STAN	2	0.5	-0.501784	0.882057	-0.309339	-0.310388	-0.639247	-0.185729	-0.178594	0.333333	0.166667	0	0	1	0.166667
100	STAN	3	0.5	-0.501784	-0.117943	-0.309339	-0.310388	0.360753	-0.185729	-0.178594	0	0	0.666667	0	-0.8	0
100	STAN	5	0.5	-0.501784	-0.117943	-0.309339	-0.310388	0.360753	-0.185729	-0.178594	0	0	0.666667	0	-1.8	-1
100	STAN	2	0.5	-0.501784	-0.117943	-0.309339	-0.310388	0.360753	-0.185729	-0.178594	0	0	-0.333333	0	NA	NA
318	STAN	4	0.5	-0.501784	-0.117943	-0.309339	-0.310388	-0.639247	-0.185729	-0.178594	-0.333333	0.166667	0	0	-0.166667	-0.5
318	STAN	5	0.5	-0.501784	-0.117943	-0.309339	-0.310388	-0.639247	-0.185729	-0.178594	-0.333333	-0.833333	0	0	-0.166667	-0.5
318	STAN	4	0.5	-0.501784	-0.117943	-0.309339	-0.310388	-0.639247	-0.185729	-0.178594	-0.333333	0.166667	NA	0	-0.166667	0.5
438	STAN	6	0.5	0.498216	-0.117943	-0.309339	0.689612	-0.639247	-0.185729	-0.178594	0.833333	0.166667	-0.333333	0	-1	-0.833333
438	STAN	4	0.5	0.498216	-0.117943	-0.309339	0.689612	-0.639247	-0.185729	-0.178594	-0.166667	0.166667	-0.333333	0	1	1.16667
438	STAN	5	0.5	0.498216	-0.117943	-0.309339	0.689612	-0.639247	-0.185729	-0.178594	-0.166667	0.166667	0.666667	0	1	1.16667
77	STAN	3	0.5	-0.501784	0.882057	-0.309339	-0.310388	-0.639247	-0.185729	-0.178594	-0.2	0.333333	0	0	-0.166667	-0.333333
77	STAN	3	0.5	-0.501784	0.882057	-0.309339	-0.310388	-0.639247	-0.185729	-0.178594	NA	0.333333	0	0	-0.166667	-0.333333
77	STAN	3	0.5	-0.501784	0.882057	-0.309339	-0.310388	-0.639247	-0.185729	-0.178594	-0.2	0.333333	0	0	-0.166667	-0.333333
9	STAN	6	0.5	-0.501784	-0.117943	-0.309339	-0.310388	0.360753	0.814271	-0.178594	-0.5	0	-0.666667	0	-0.333333	0
9	STAN	4	0.5	-0.501784	-0.117943	-0.309339	-0.310388	0.360753	0.814271	-0.178594	0.5	0	0.333333	0	-0.333333	0
9	STAN	5	0.5	-0.501784	-0.117943	-0.309339	-0.310388	0.360753	0.814271	-0.178594	-0.5	0	0.333333	0	-0.333333	0
47	STAN	6	0.6	-0.501784	-0.117943	-0.309339	0.689612	-0.639247	0.814271	-0.178594	0.8	-0.4	-0.4	0	-0.4	0
47	STAN	2	0.6	-0.501784	-0.117943	-0.309339	0.689612	-0.639247	0.814271	-0.178594	-0.2	0.6	0.6	0	0.6	0
22	STAN	5	0.5	0.498216	-0.117943	-0.309339	-0.310388	0.360753	-0.185729	0.821406	0	0	0	0	1.16667	1
22	STAN	7	0.5	0.498216	-0.117943	-0.309339	-0.310388	0.360753	-0.185729	0.821406	0	0	0	0	-0.833333	-1
22	STAN	5	0.5	0.498216	-0.117943	-0.309339	-0.310388	0.360753	-0.185729	0.821406	0	0	0	0	1.16667	1
69	STAN	4	0.5	0.498216	0.882057	0.690661	-0.310388	0.360753	-0.185729	-0.178594	0	0	0	0	-0.333333	0.5
69	STAN	3	0.5	0.498216	0.882057	0.690661	-0.310388	0.360753	-0.185729	-0.178594	0	0	0	0	1.66667	-0.5
69	STAN	4	0.5	0.498216	0.882057	0.690661	-0.310388	0.360753	-0.185729	-0.178594	0	0	0	0	-0.333333	-0.5
26	STAN	4	0.6	0.498216	-0.117943	0.690661	-0.310388	0.360753	-0.185729	0.821406	0	-0.2	0.6	0	0.2	0.2
26	STAN	5	0.6	0.498216	-0.117943	0.690661	-0.310388	0.360753	-0.185729	0.821406	0	-0.2	-0.4	0	0.2	0.2
44	STAN	3	0.5	-0.501784	-0.117943	-0.309339	-0.310388	-0.639247	-0.185729	-0.178594	0.5	0.333333	0	0	1.16667	0
44	STAN	5	0.5	-0.501784	-0.117943	-0.309339	-0.310388	-0.639247	-0.185729	-0.178594	-0.5	0.333333	0	0	-0.833333	-2
44	STAN	7	0.5	-0.501784	-0.117943	-0.309339	-0.310388	-0.639247	-0.185729	-0.178594	0.5	0.333333	0	0	-1.83333	0
[truncated: 2,766 more rows]
